# Supplementary material
Source: publisher figshare collection journal article supplement (https://acs.figshare.com/ndownloader/files/4546504)

# Diastereoselective Synthesis of 2,3,6- Trisubstituted Piperidines

*John M. Humphrey,\* Eric P. Arnold, Thomas A. Chappie, John B. Feltenberger, Arthur  
Nagel, Wendy Simon, Melani Suarez-Contreras, Norma J. Tom and Brian T. O'Neill\**

Pfizer Global Research and Development, Eastern Point Rd. Groton, CT, 06340

## Supporting Information

|                                     | Page       |
|-------------------------------------|------------|
| <b>General Experimental Methods</b> | <b>S2</b>  |
| <b><sup>1</sup>H NMR Spectra</b>    | <b>S3</b>  |
| <b>X-ray Crystallography</b>        | <b>S33</b> |

## General Experimental Methods.

$^1\text{H}$  and  $^{13}\text{C}$  NMR spectra are reported in ppm relative to the residual solvent signal. Data are reported as follows: chemical shift, multiplicity (s = singlet, d = doublet, t = triplet, q = quartet, m = multiplet, br = broad, comp = complicated pattern due to overlapping resonances, par obsc = partially obscured), coupling constant (J) in Hz, and integration. Low resolution mass spectrometry data was obtained using the chemical ionization method. Infrared spectra are reported as diffuse reflectance (DRIFTS) values. Melting points are reported uncorrected. Solution pH measurements were made with Whatman type CF pH 0-14 indicator paper strips. Inert atmosphere reactions were conducted in oven-dried glassware under an atmosphere of dry nitrogen. Anhydrous solvents and reagents, including 25% sodium methoxide in methanol, were obtained from Aldrich and used without further purification. Two exceptions are ethyl vinyl ketone and methyl vinyl ketone, which were distilled prior to use. Commercial grade Raney® 2800 nickel (Aldrich Catalog #22,167-8) was rinsed with deionized water until the rinse registered a neutral pH. The resultant neutral Raney nickel gave better results for hydrogenation of the nitro group. Some procedures employed fresh Raney nickel, which was prepared as described below. The following protocols include full experimental details for the synthesis of each of the 6-ethyl isomers, and select procedures for the synthesis of various compounds from the 6-methyl series.

Solvent: cdcl3  
Ambient temperature  
UNITYplus-400  
PULSE SEQUENCE  
Pulse 45.0 degrees  
Acq. time 2.355 sec  
Width 6794.6 Hz  
16 repetitions  
OBSERVE H1, 399.6555328 MHz  
DATA PROCESSING  
Line broadening 0.1 Hz  
FT size 32768  
Total time 1 minute

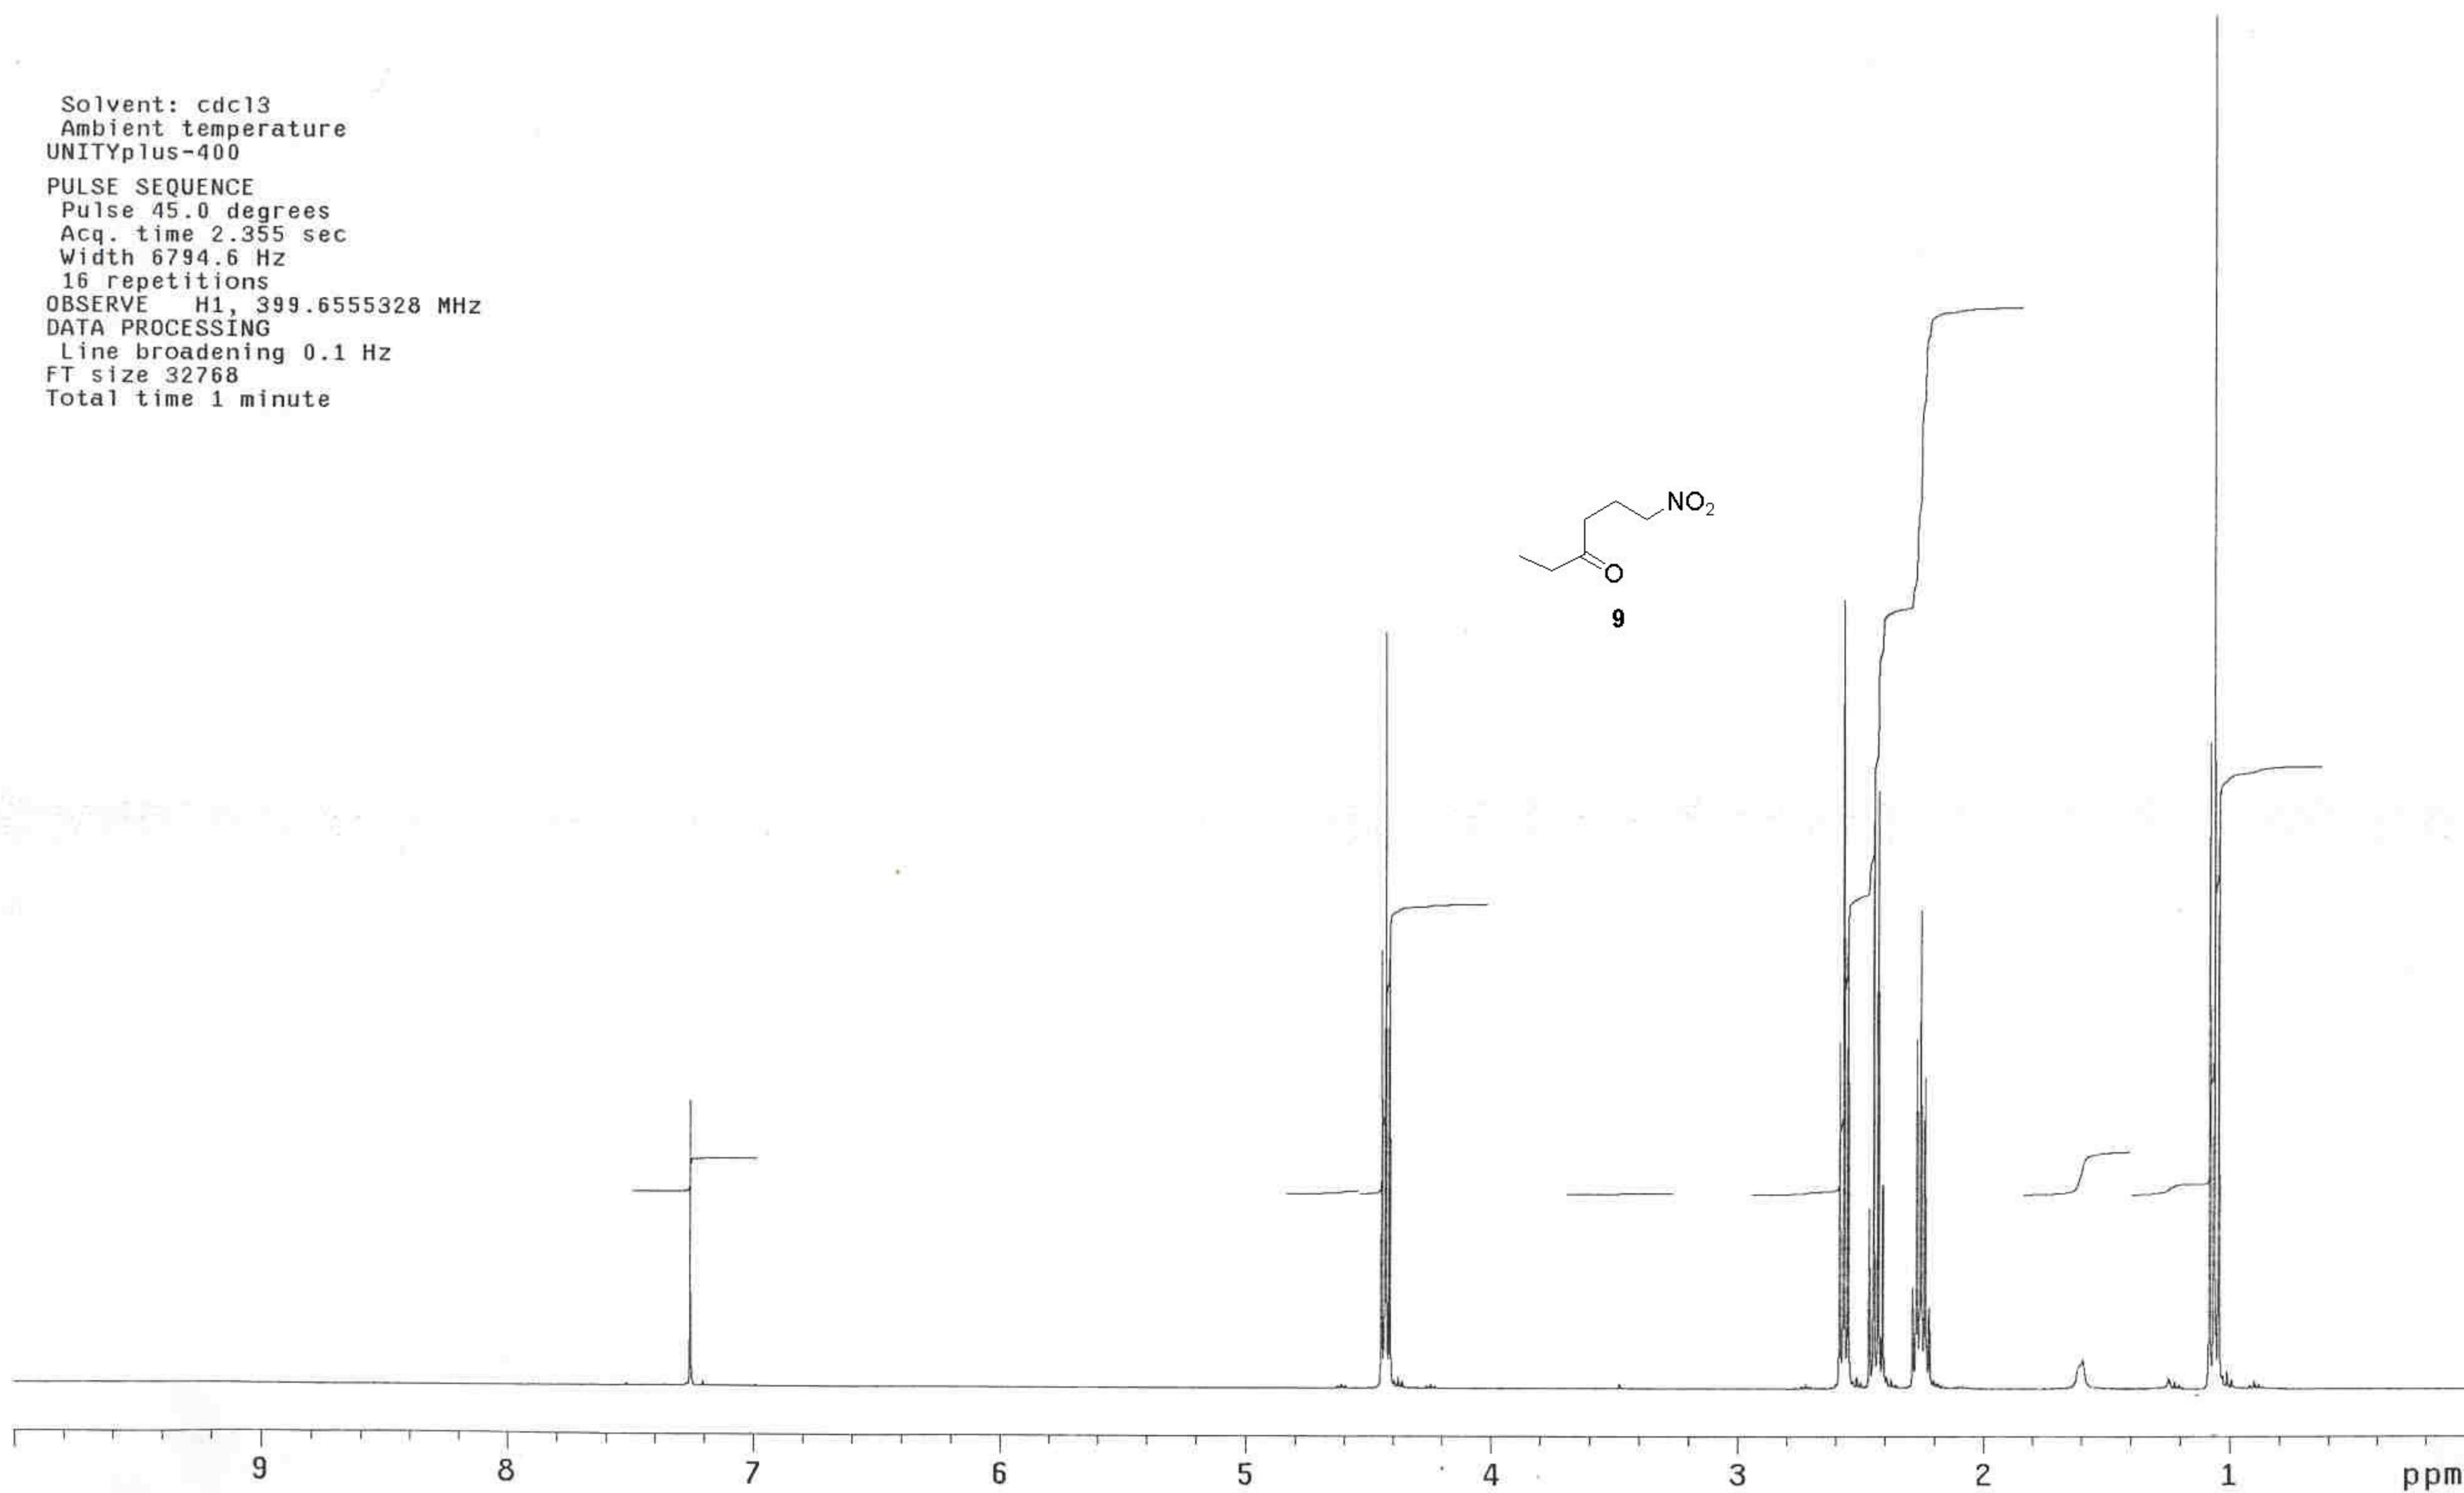

Solvent: cdc13  
Ambient temperature  
Sample #20  
File: 2001  
UNITYplus-400  
PULSE SEQUENCE  
Pulse 45.0 degrees  
Acq. time 2.410 sec  
Width 6798.1 Hz  
32 repetitions  
OBSERVE H1, 399.8914397 MHz  
DATA PROCESSING  
Line broadening 0.1 Hz  
FT size 32768  
Total time 1 minute

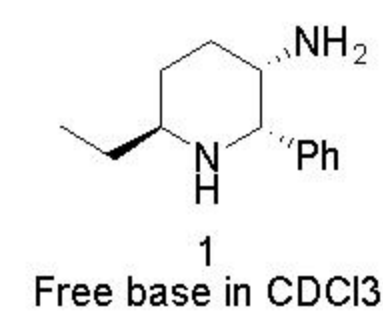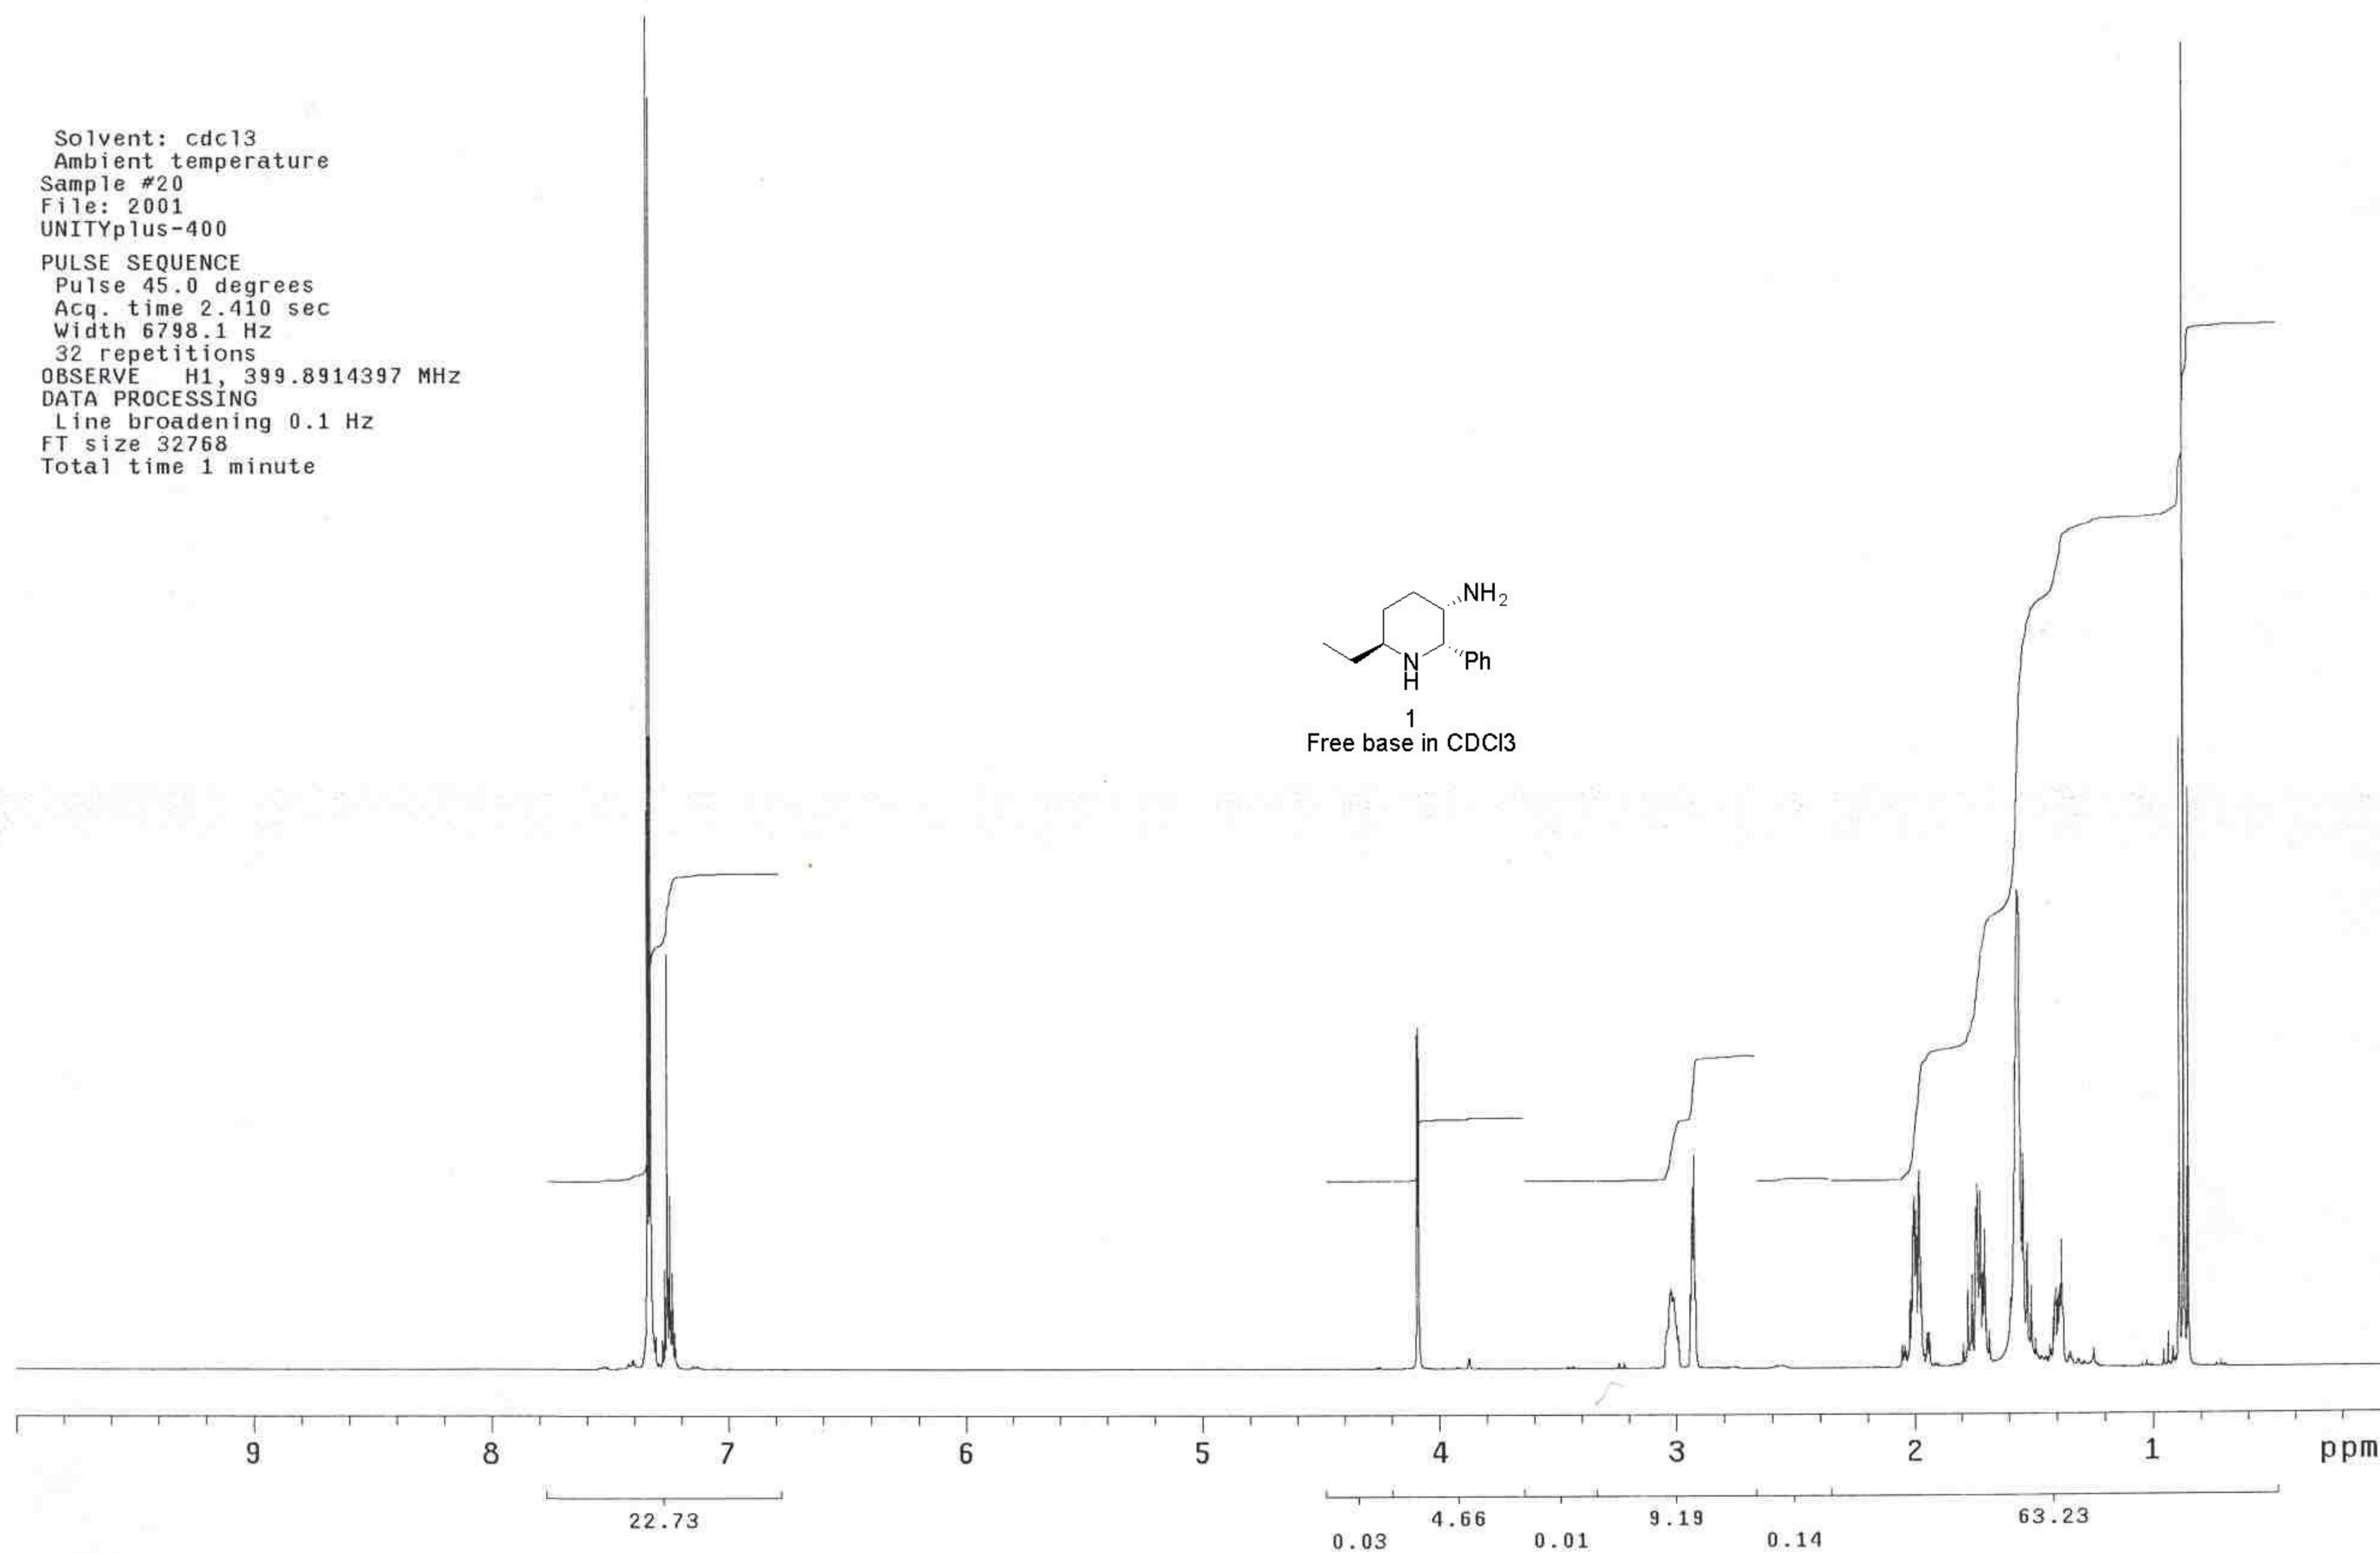

Solvent: d2o  
Ambient temperature  
UNITYplus-400  
PULSE SEQUENCE  
Pulse 45.0 degrees  
Acq. time 2.412 sec  
Width 6794.1 Hz  
16 repetitions  
OBSERVE H1, 399.6565599 MHz  
DATA PROCESSING  
Line broadening 0.1 Hz  
FT size 32768  
Total time 1 minute

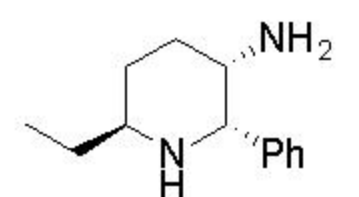

1  
Di-HCl salt in D2O

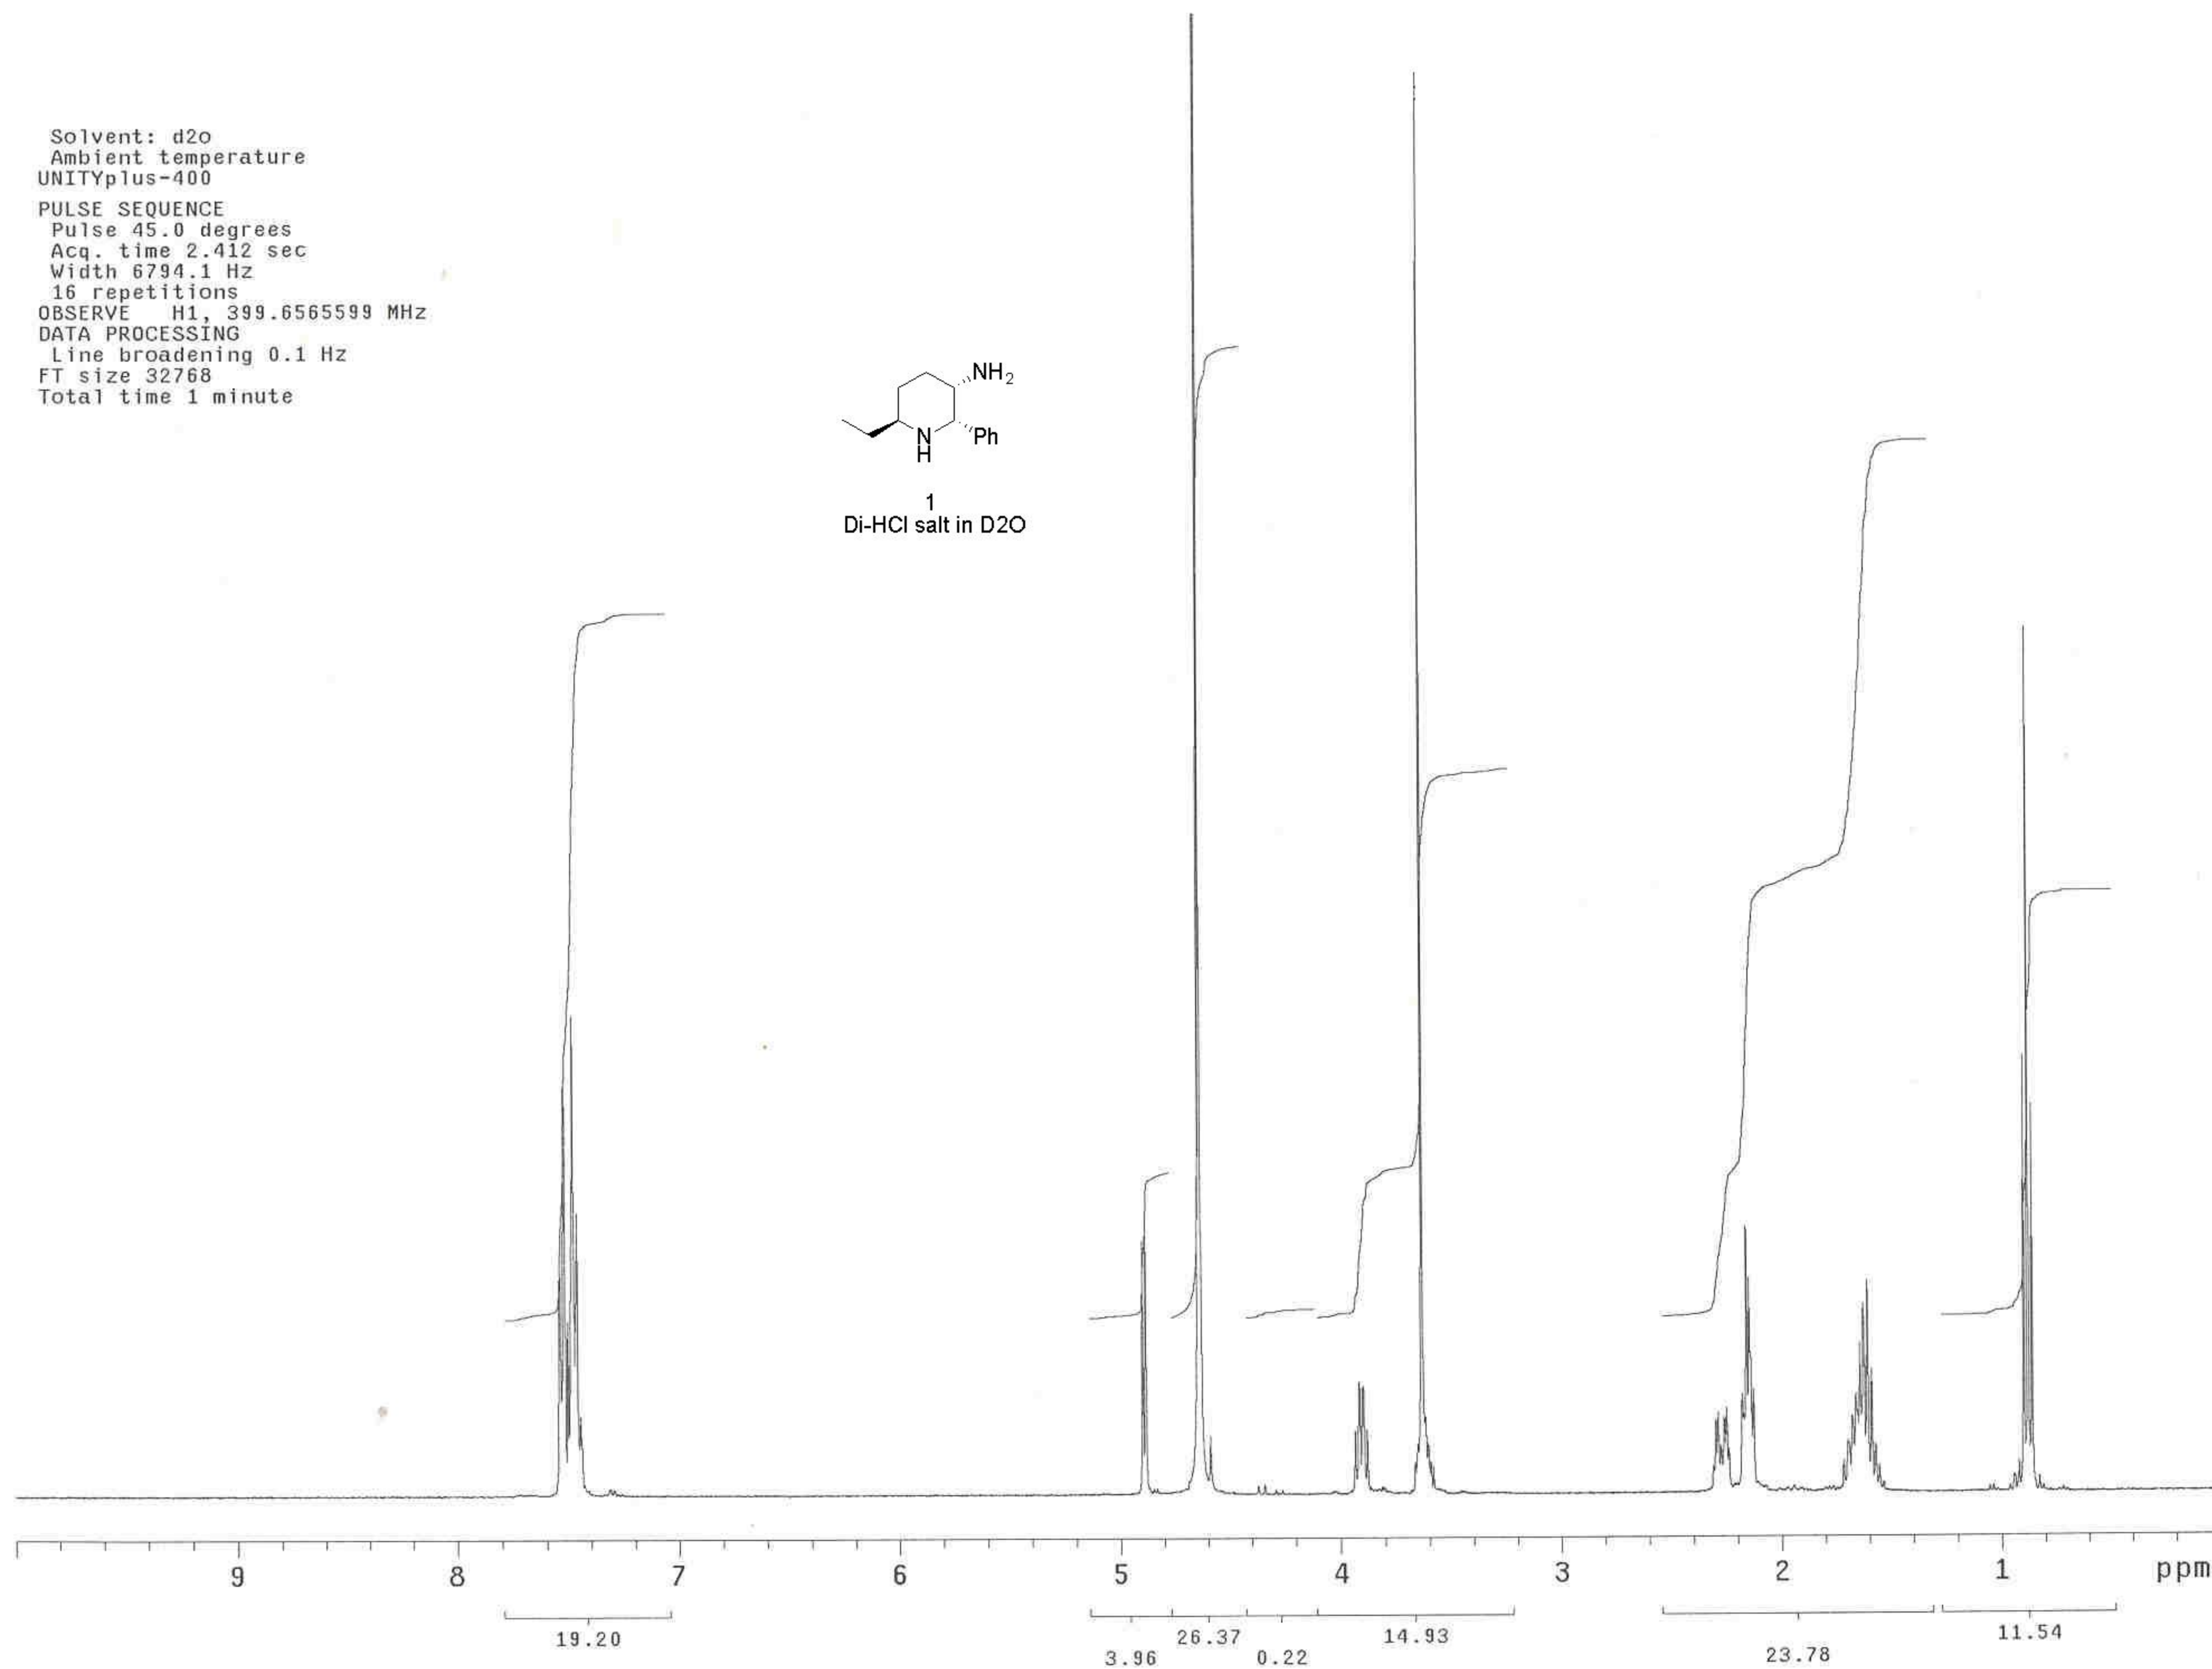



Automation directory: /auto/Automation\_data/090205

Pulse Sequence: s2pu1

Solvent: dmsd

Temp. 25.0 C / 298.1 K

Sample #40, user thomas.a.chappie@pfizer.com

File: 4001

INOVA-400 "unityn"

Relax. delay 0.950 sec

Pulse 45.0 degrees

Acq. time 2.562 sec

Width 6394.9 Hz

256 repetitions

OBSERVE H1, 399.6704280 MHz

DATA PROCESSING

Line broadening 0.4 Hz

FT size 65536

Total time 15 min, 1 sec

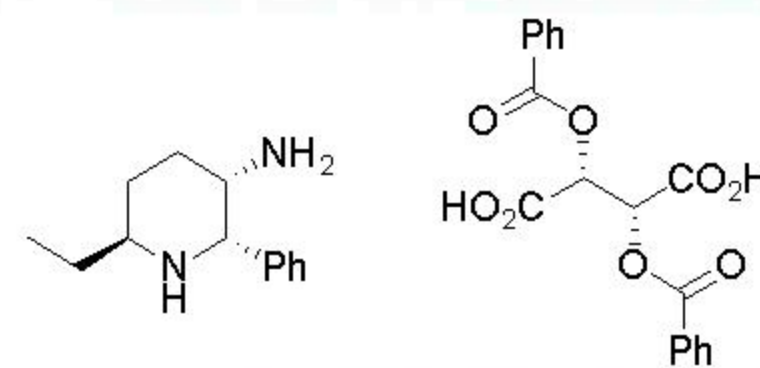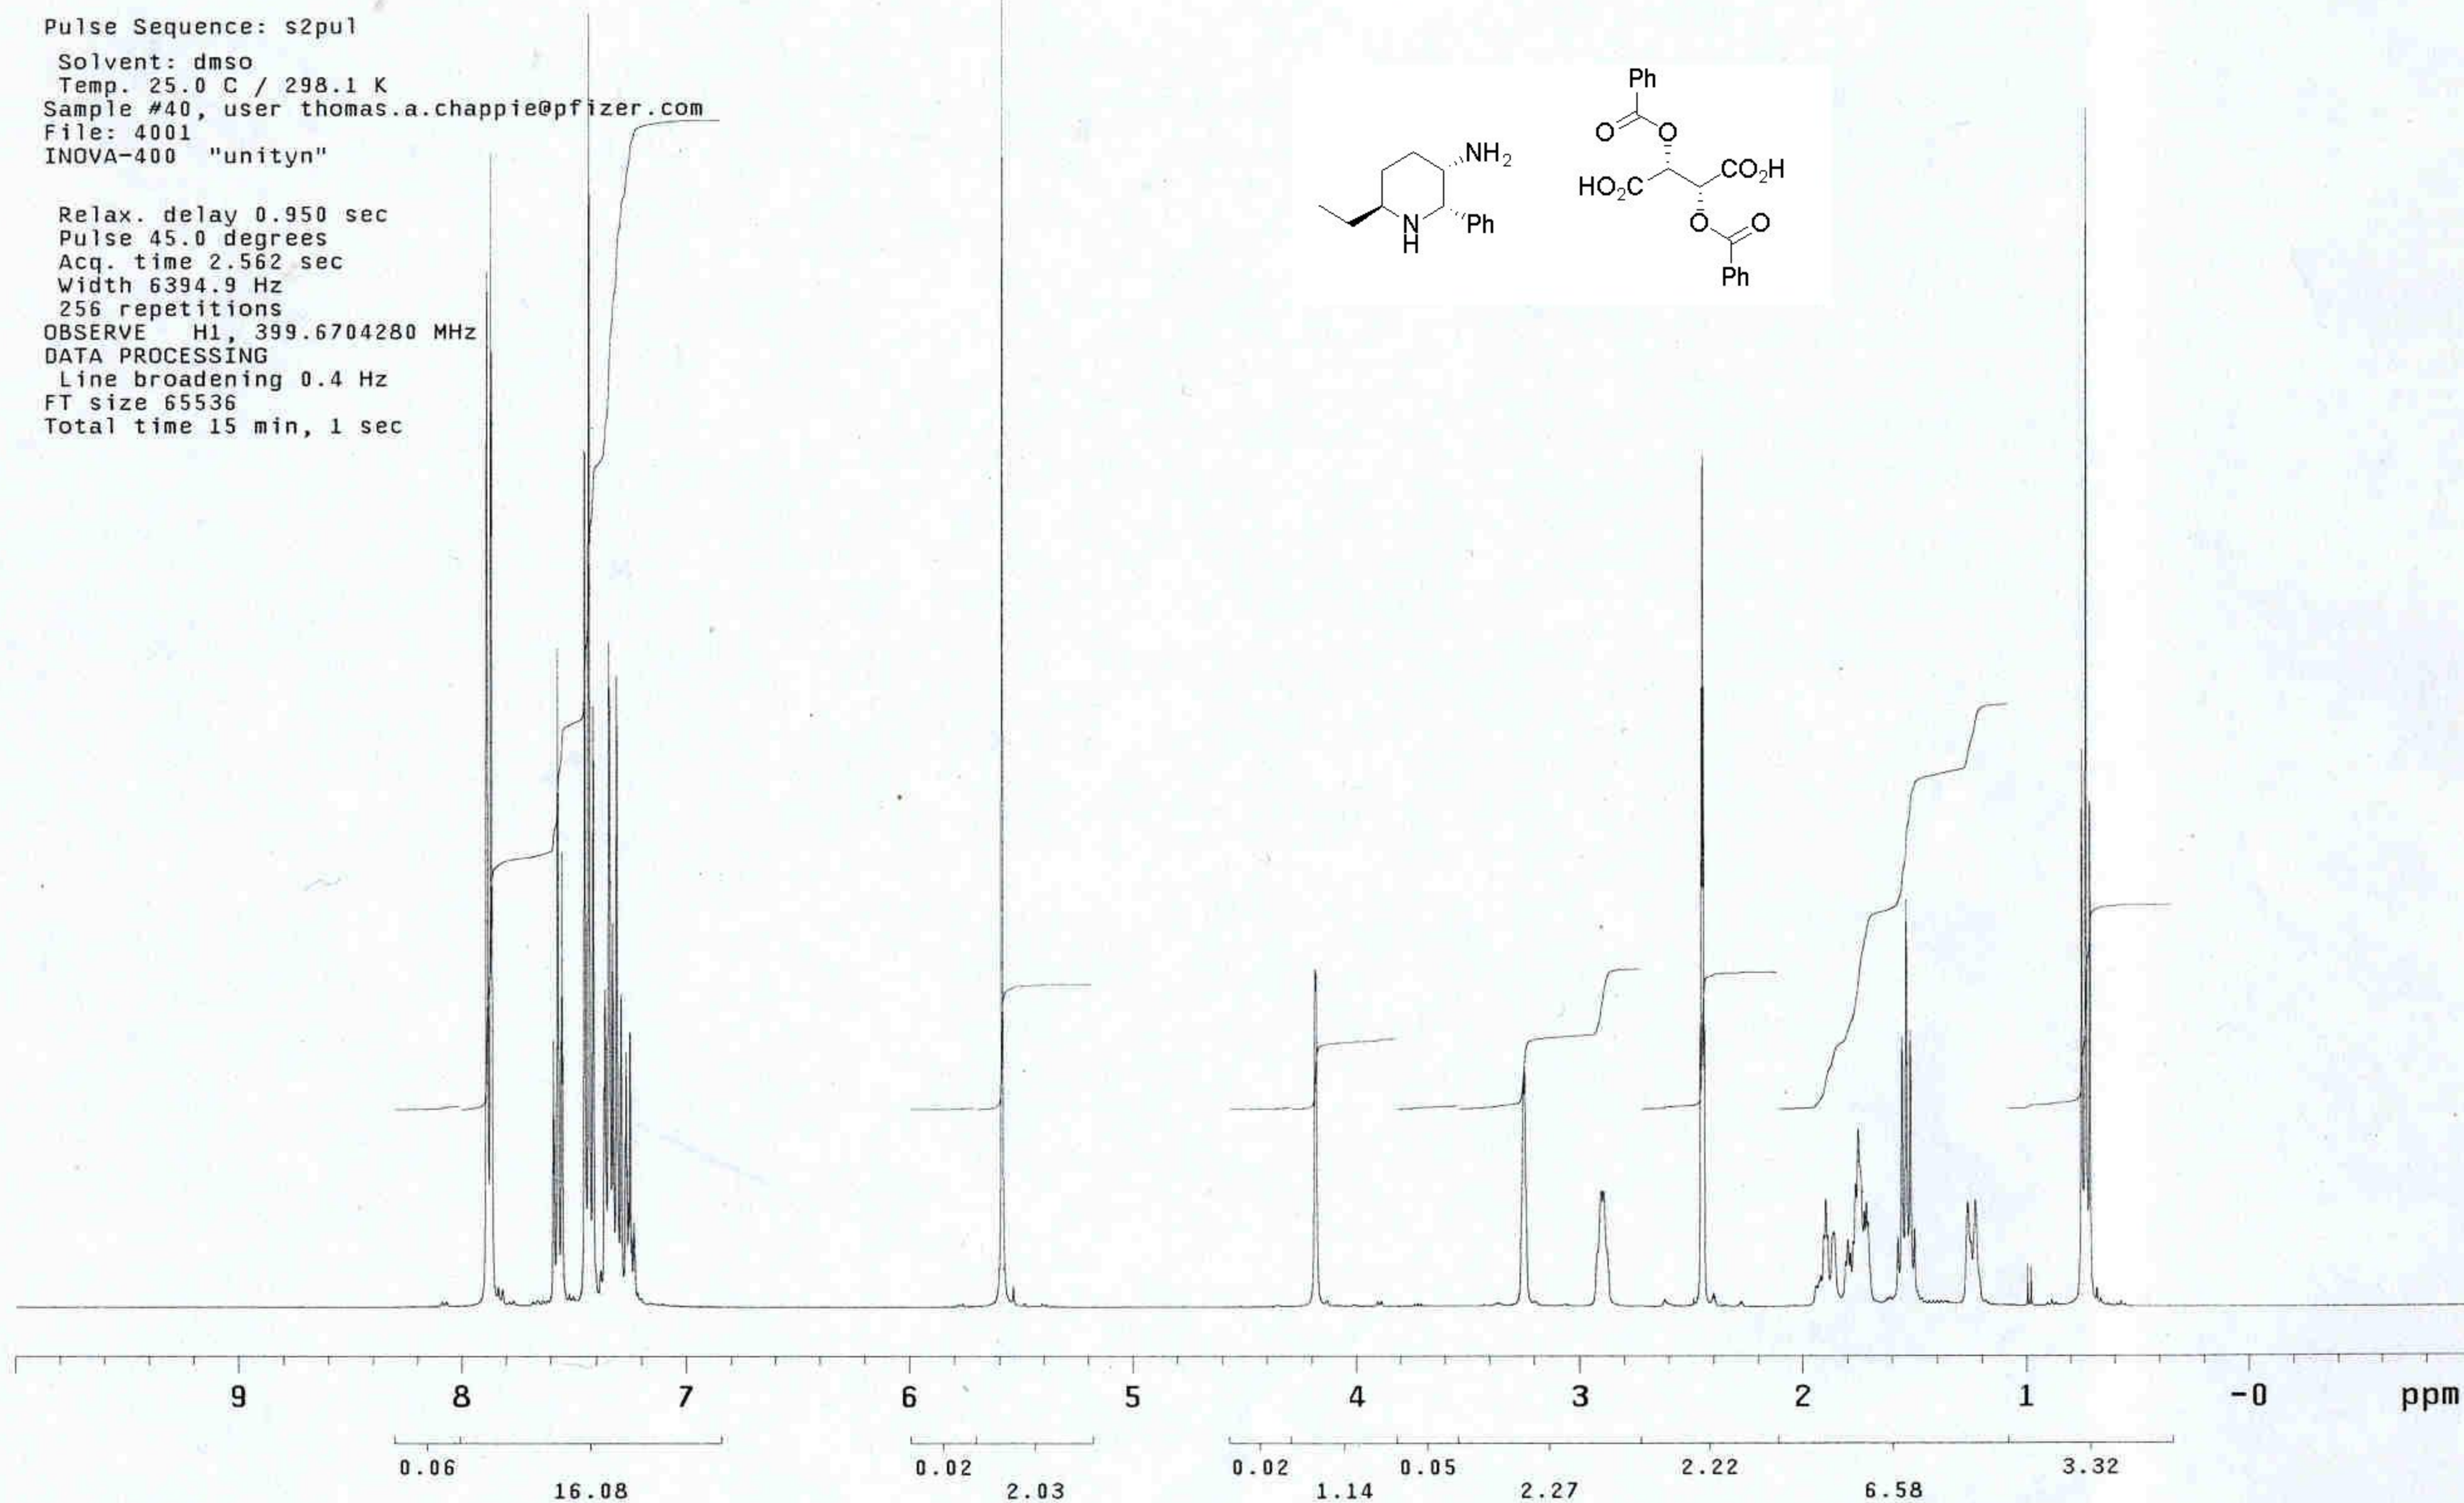

Solvent: cdcl3  
Ambient temperature  
Sample #13  
File: 1303  
UNITYplus-300  
PULSE SEQUENCE  
Pulse 45.0 degrees  
Acq. time 3.215 sec  
Width 5096.5 Hz  
32 repetitions  
OBSERVE H1, 299.7983245 MHz  
DATA PROCESSING  
Line broadening 0.1 Hz  
FT size 32768  
Total time 1 minutes

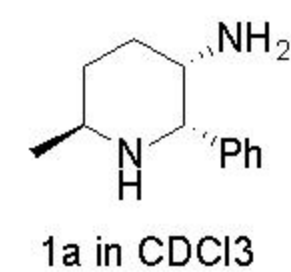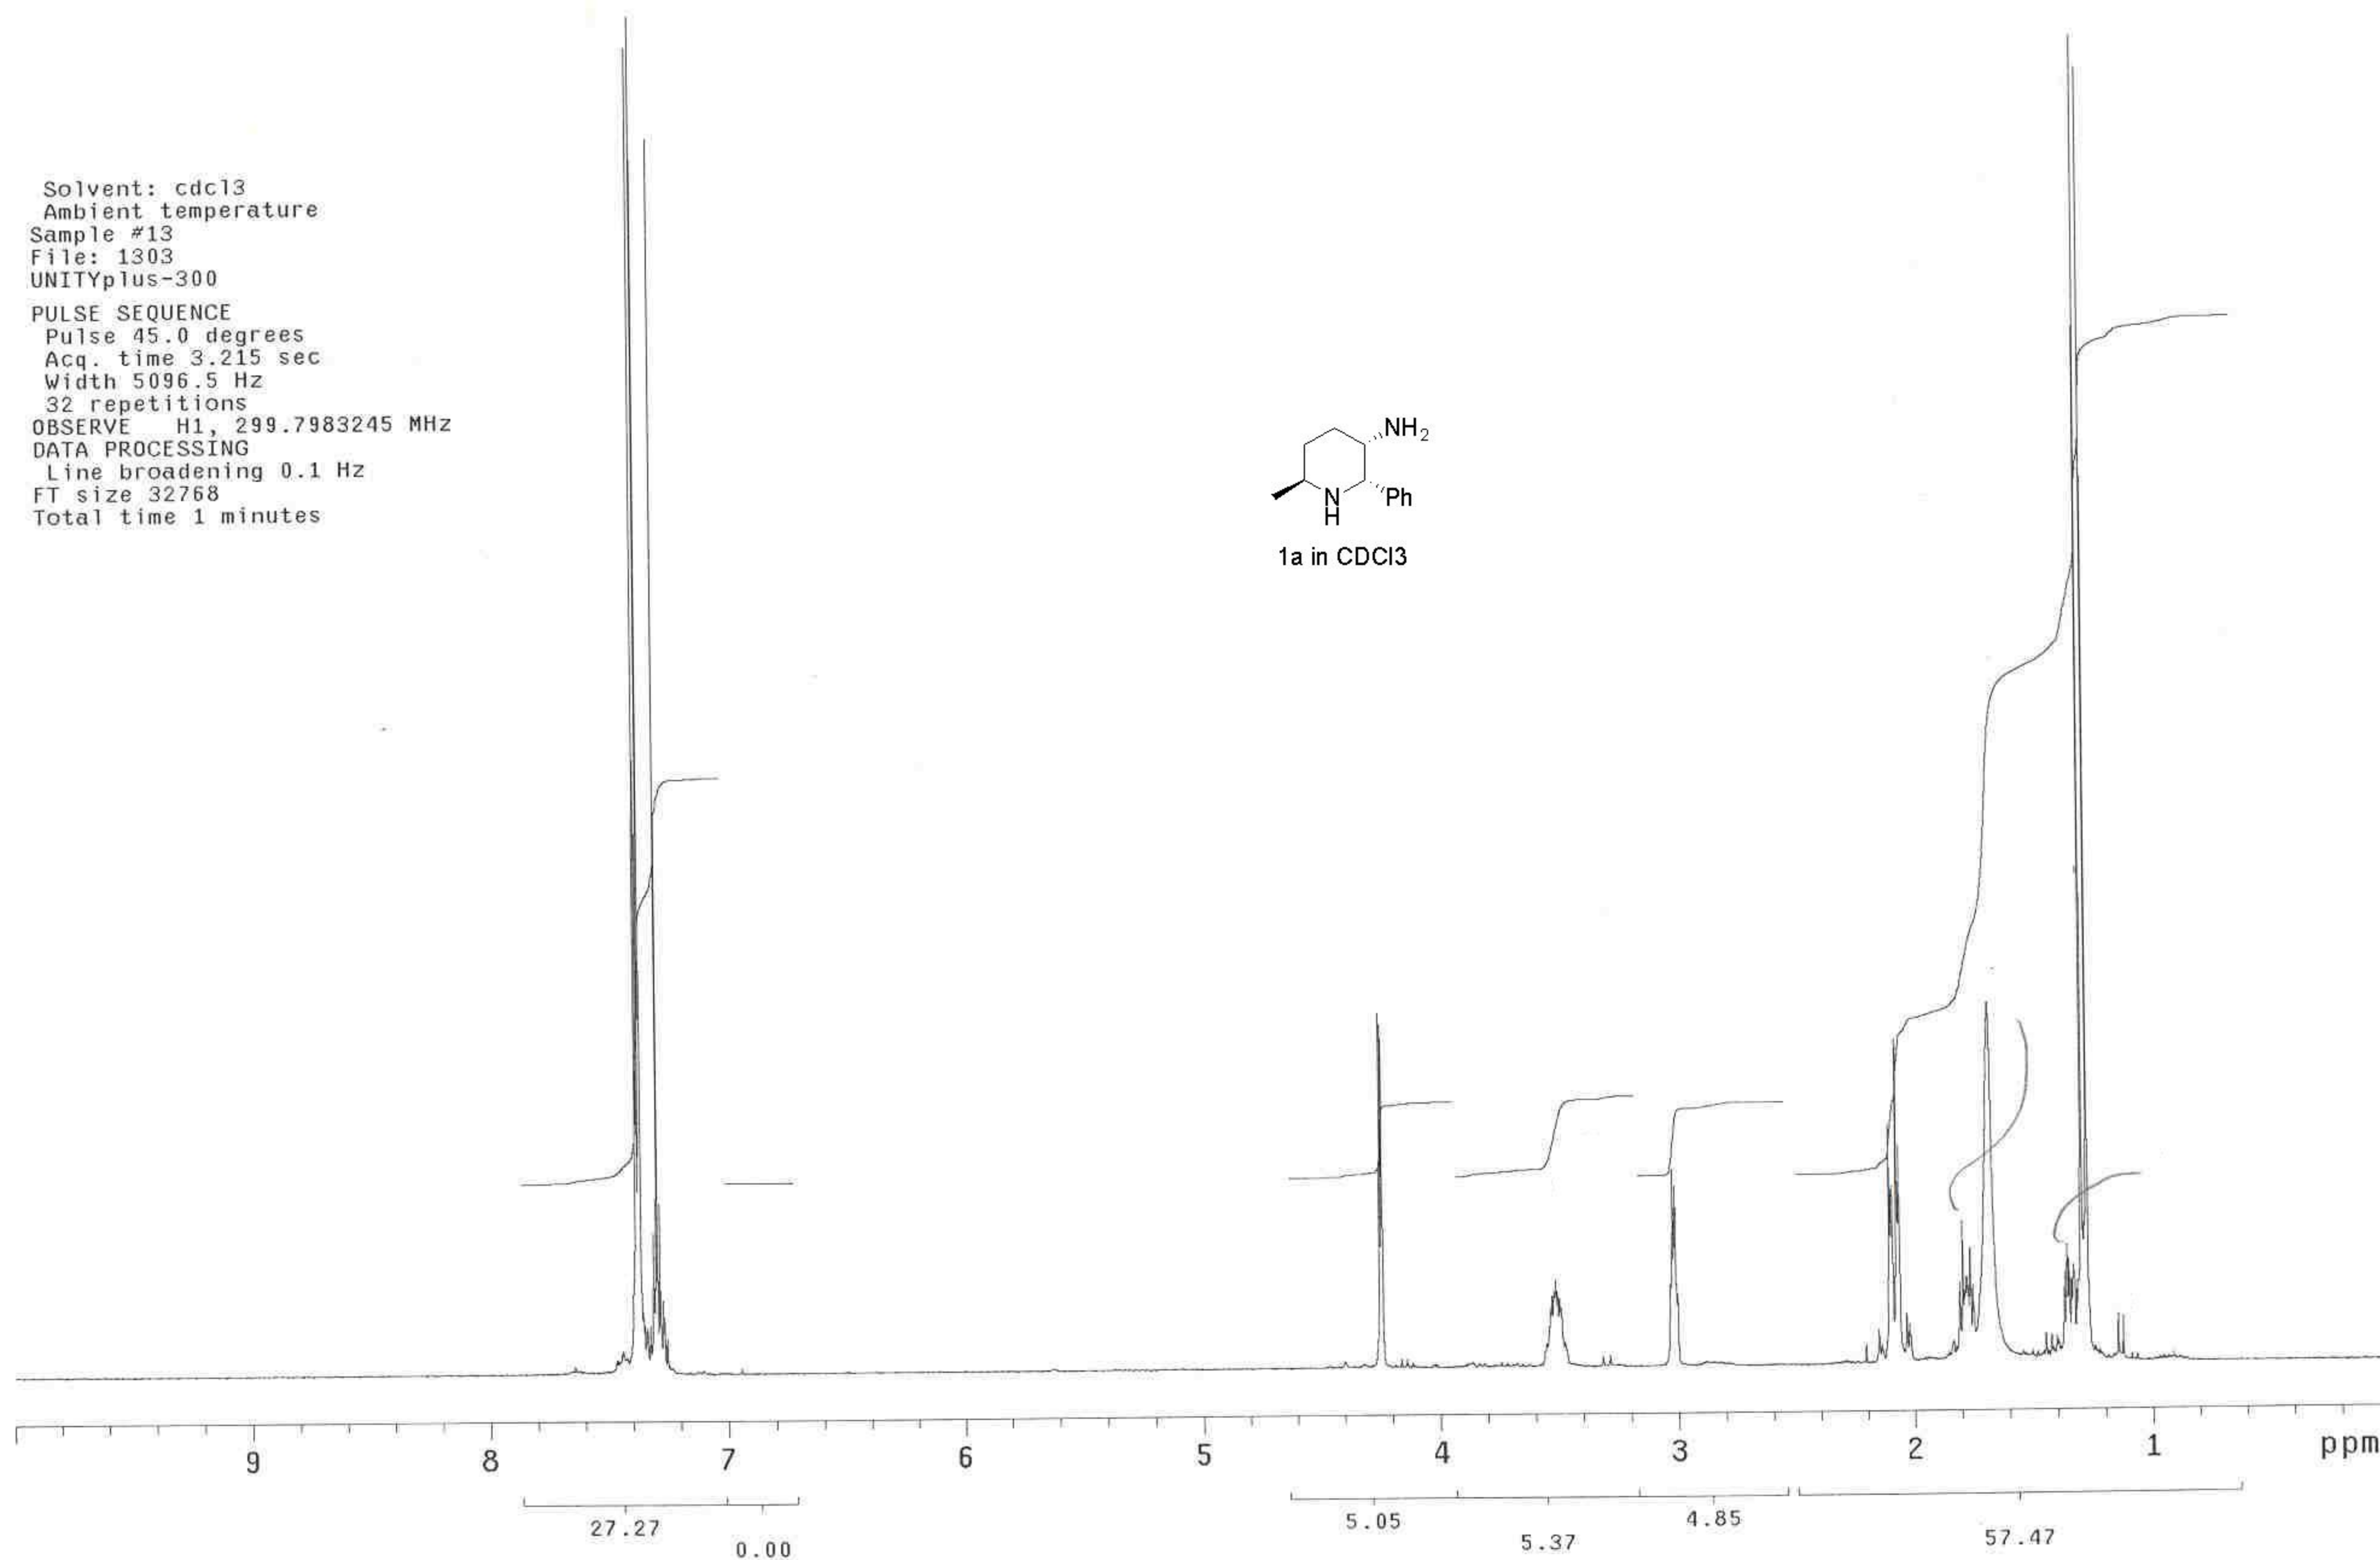



Automation directory: /auto/Automation\_data/081204

Pulse Sequence: s2pul

Solvent: d2o

Temp. 25.0 C / 298.1 K

Pulse 45.0 degrees

Acq. time 3.683 sec

Width 6394.9 Hz

16 repetitions

OBSERVE H1, 399.6695567 MHz

DATA PROCESSING

Line broadening 0.3 Hz

FT size 131072

Total time 0 min, 59 sec

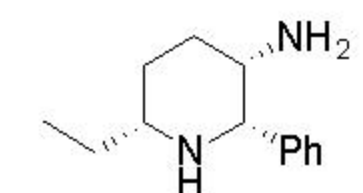

2  
Di-HCl Salt in D<sub>2</sub>O

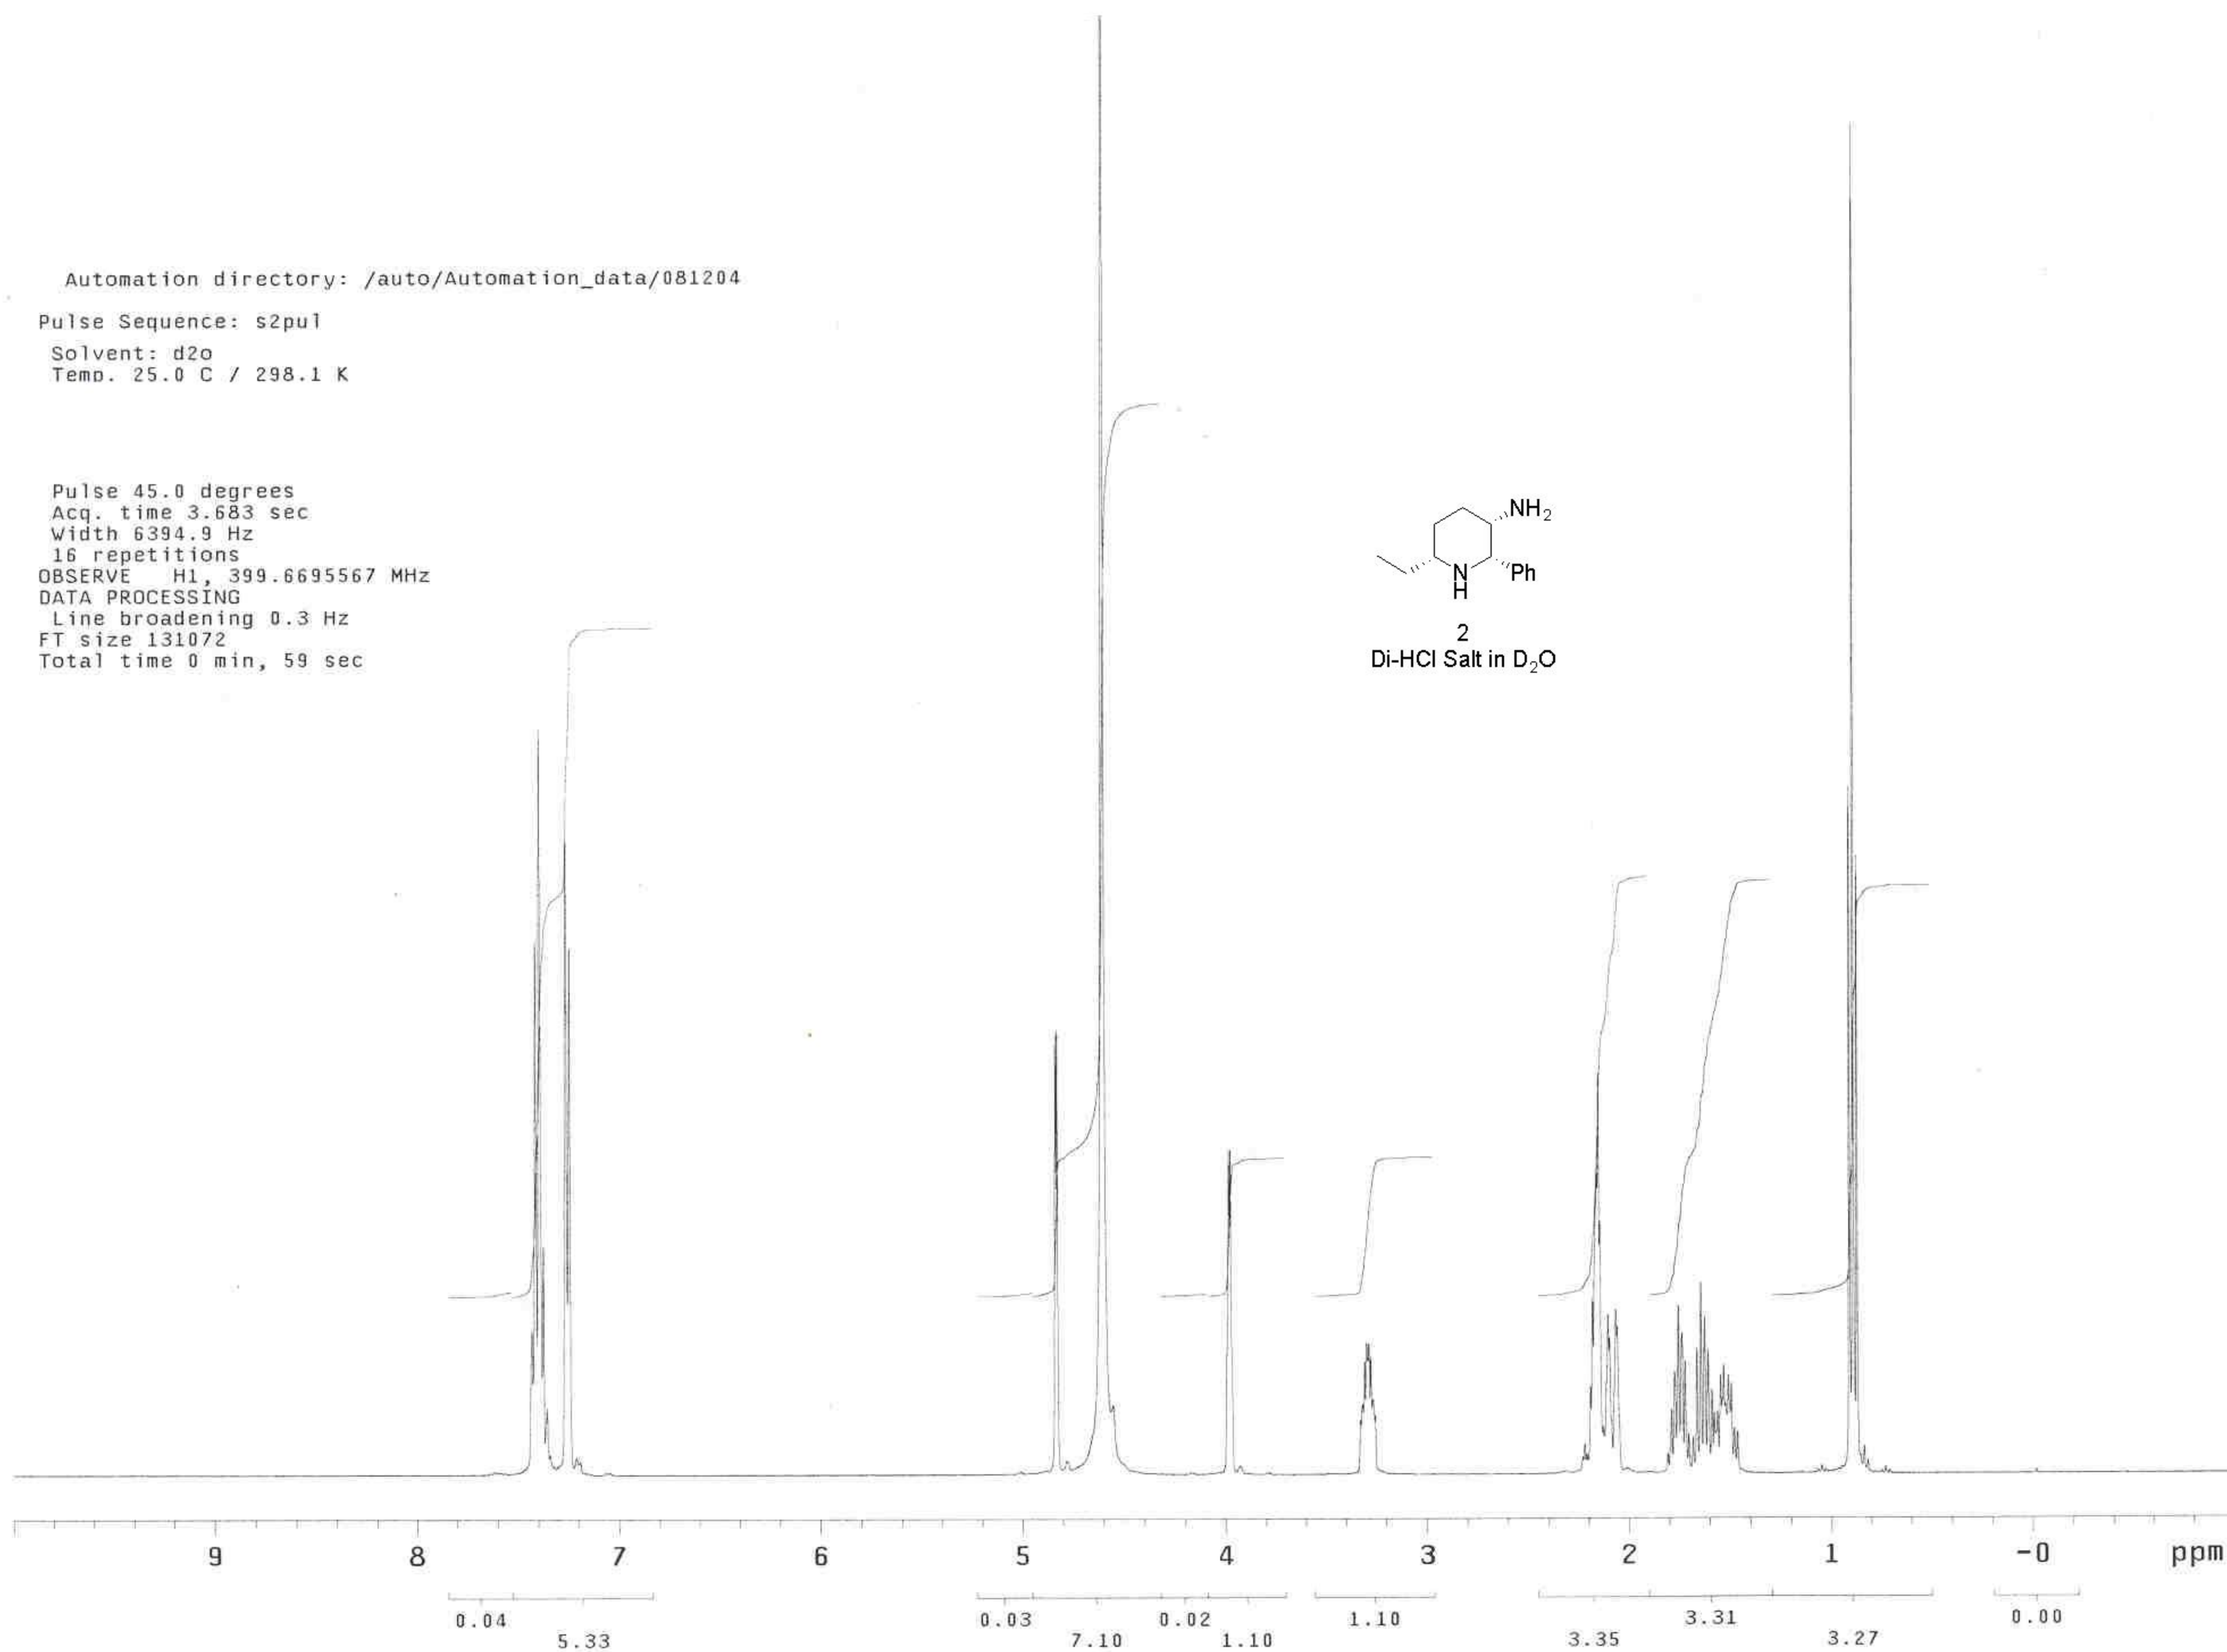



Solvent: cdcl3  
Ambient temperature  
UNITYplus-400  
PULSE SEQUENCE  
Pulse 45.0 degrees  
Acq. time 2.412 sec  
Width 6794.1 Hz  
16 repetitions  
OBSERVE H1, 399.655328 MHz  
DATA PROCESSING  
Line broadening 0.1 Hz  
FT size 32768  
Total time 1 minute

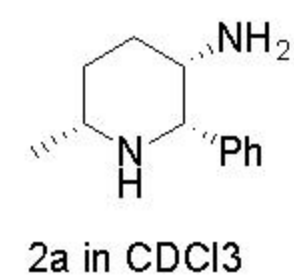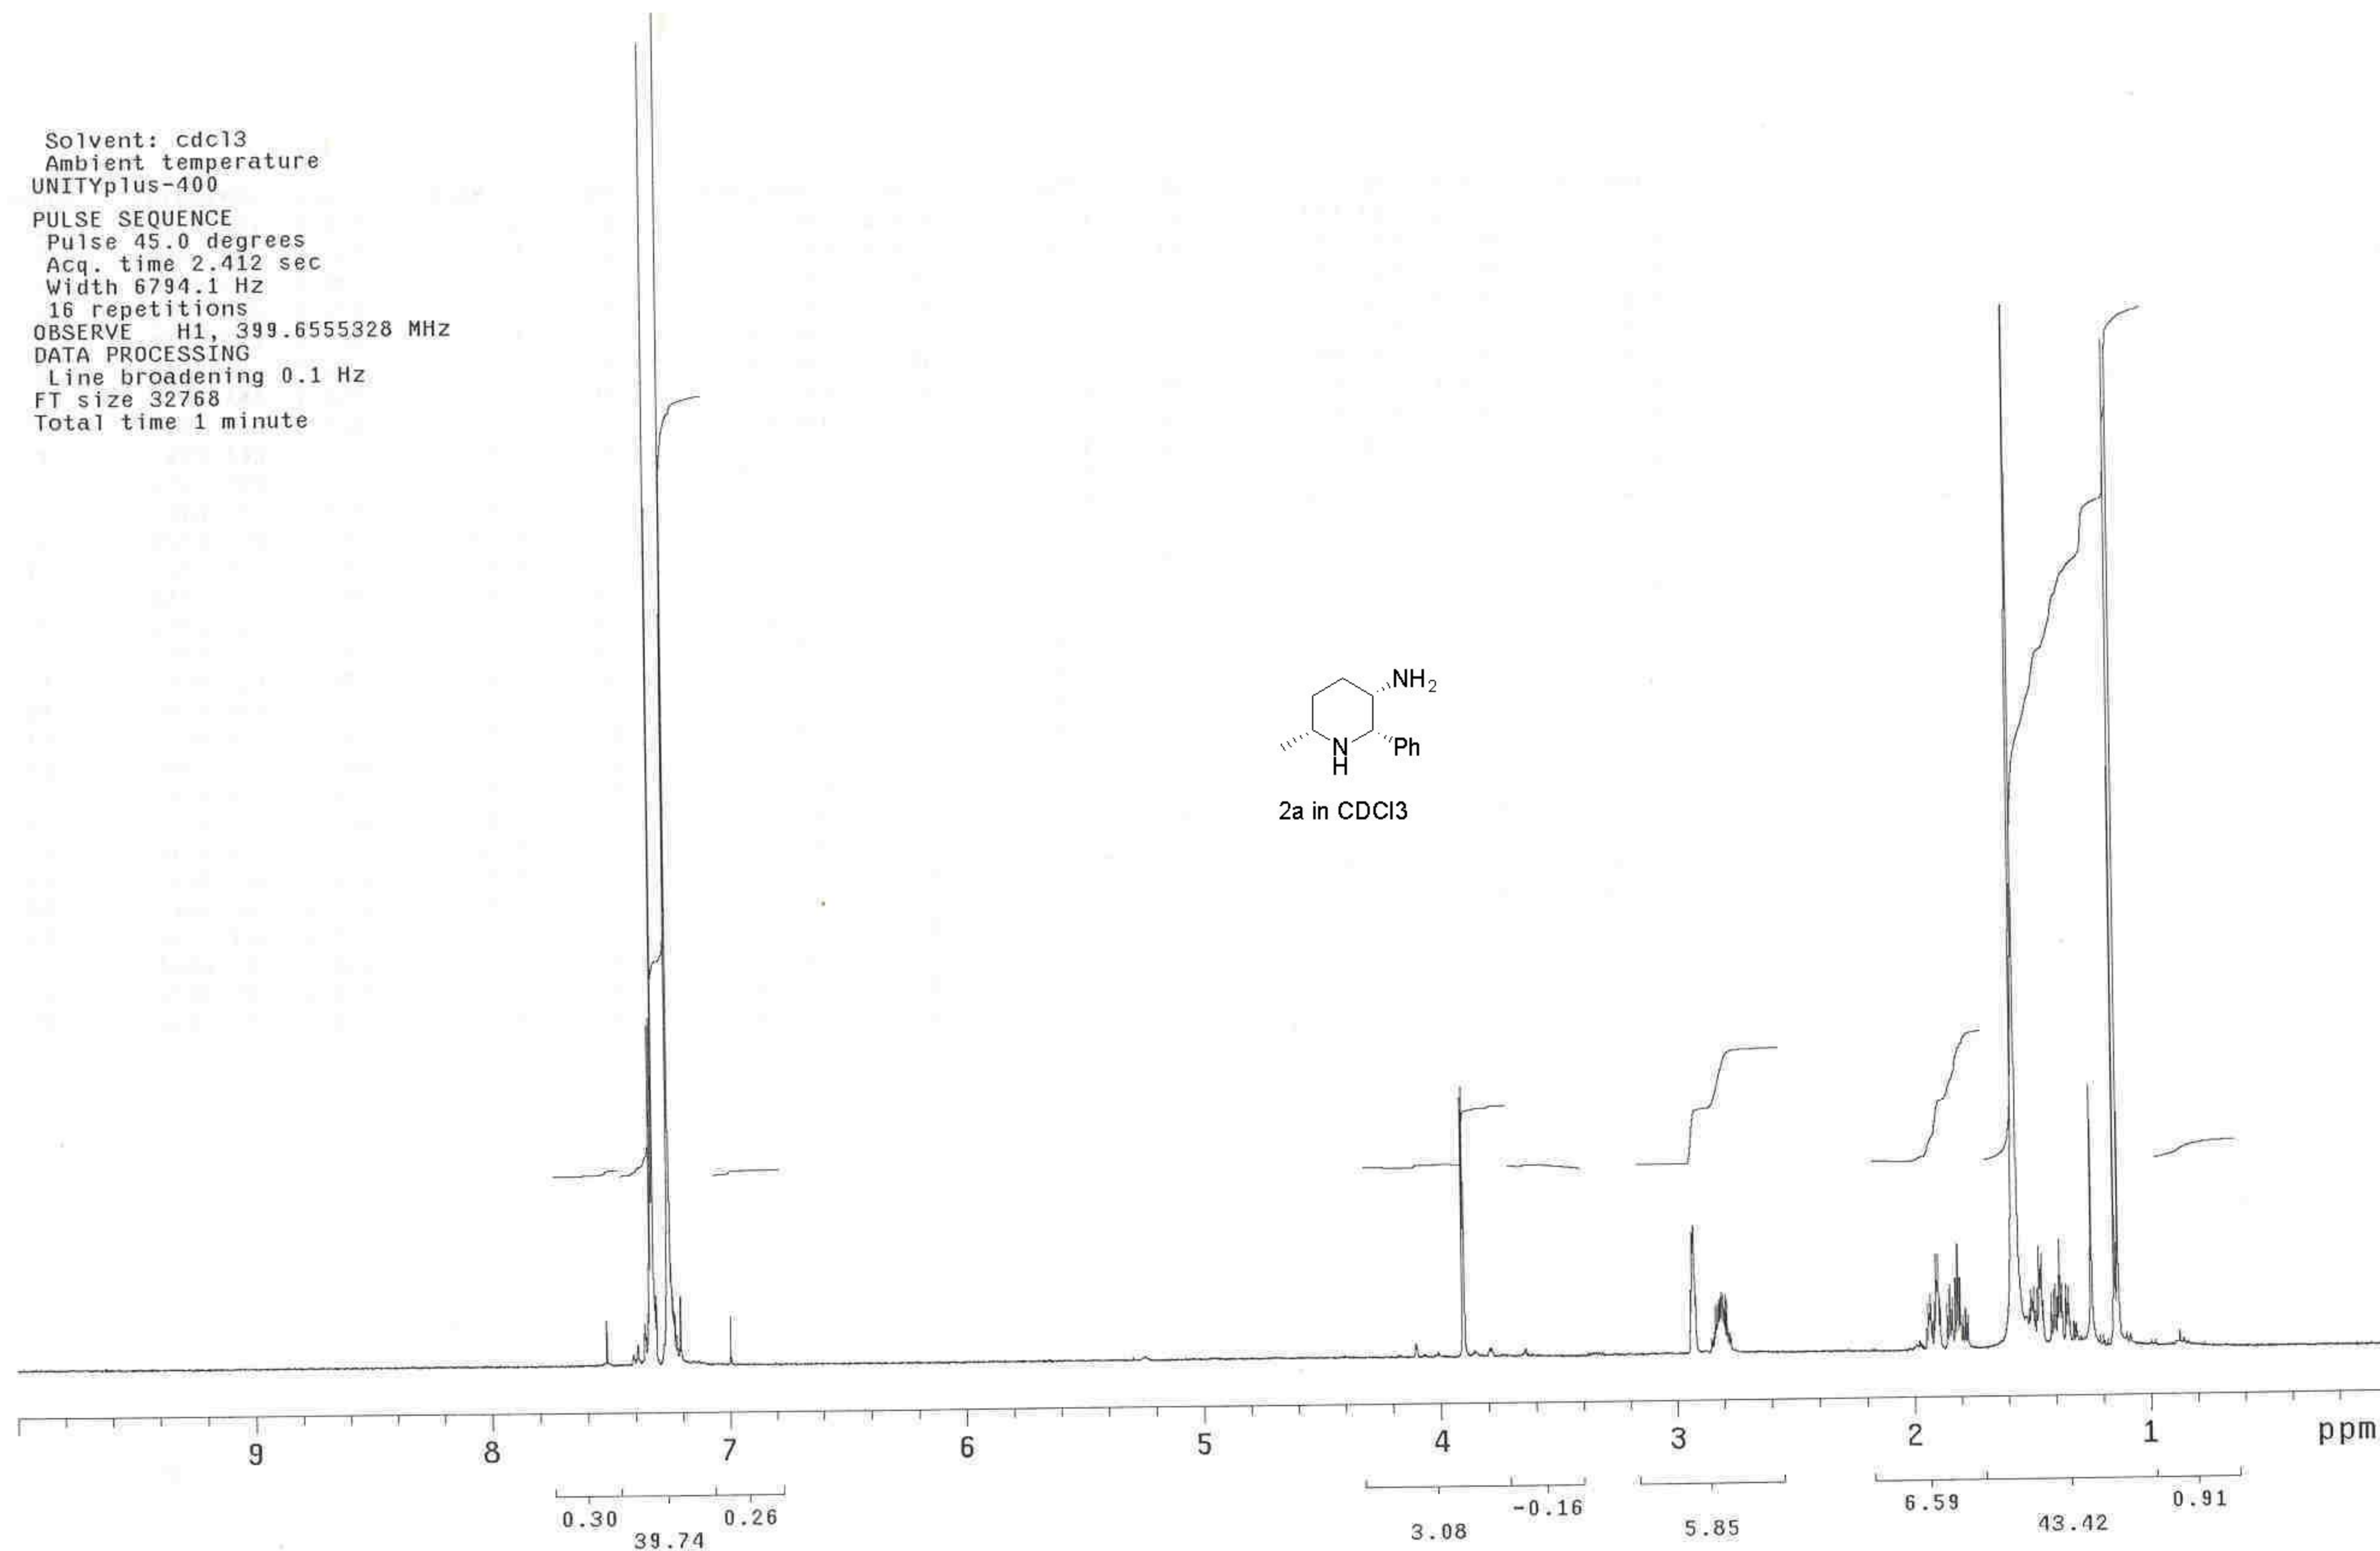

Solvent: cd3od  
Ambient temperature  
UNITYplus-400

PULSE SEQUENCE

Pulse 45.0 degrees  
Acq. time 2.411 sec  
Width 6795.2 Hz  
16 repetitions

OBSERVE H1, 399.7209483 MHz

DATA PROCESSING

Line broadening 0.1 Hz  
FT size 32768  
Total time 1 minute

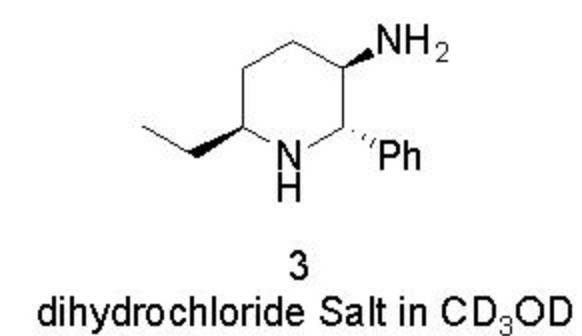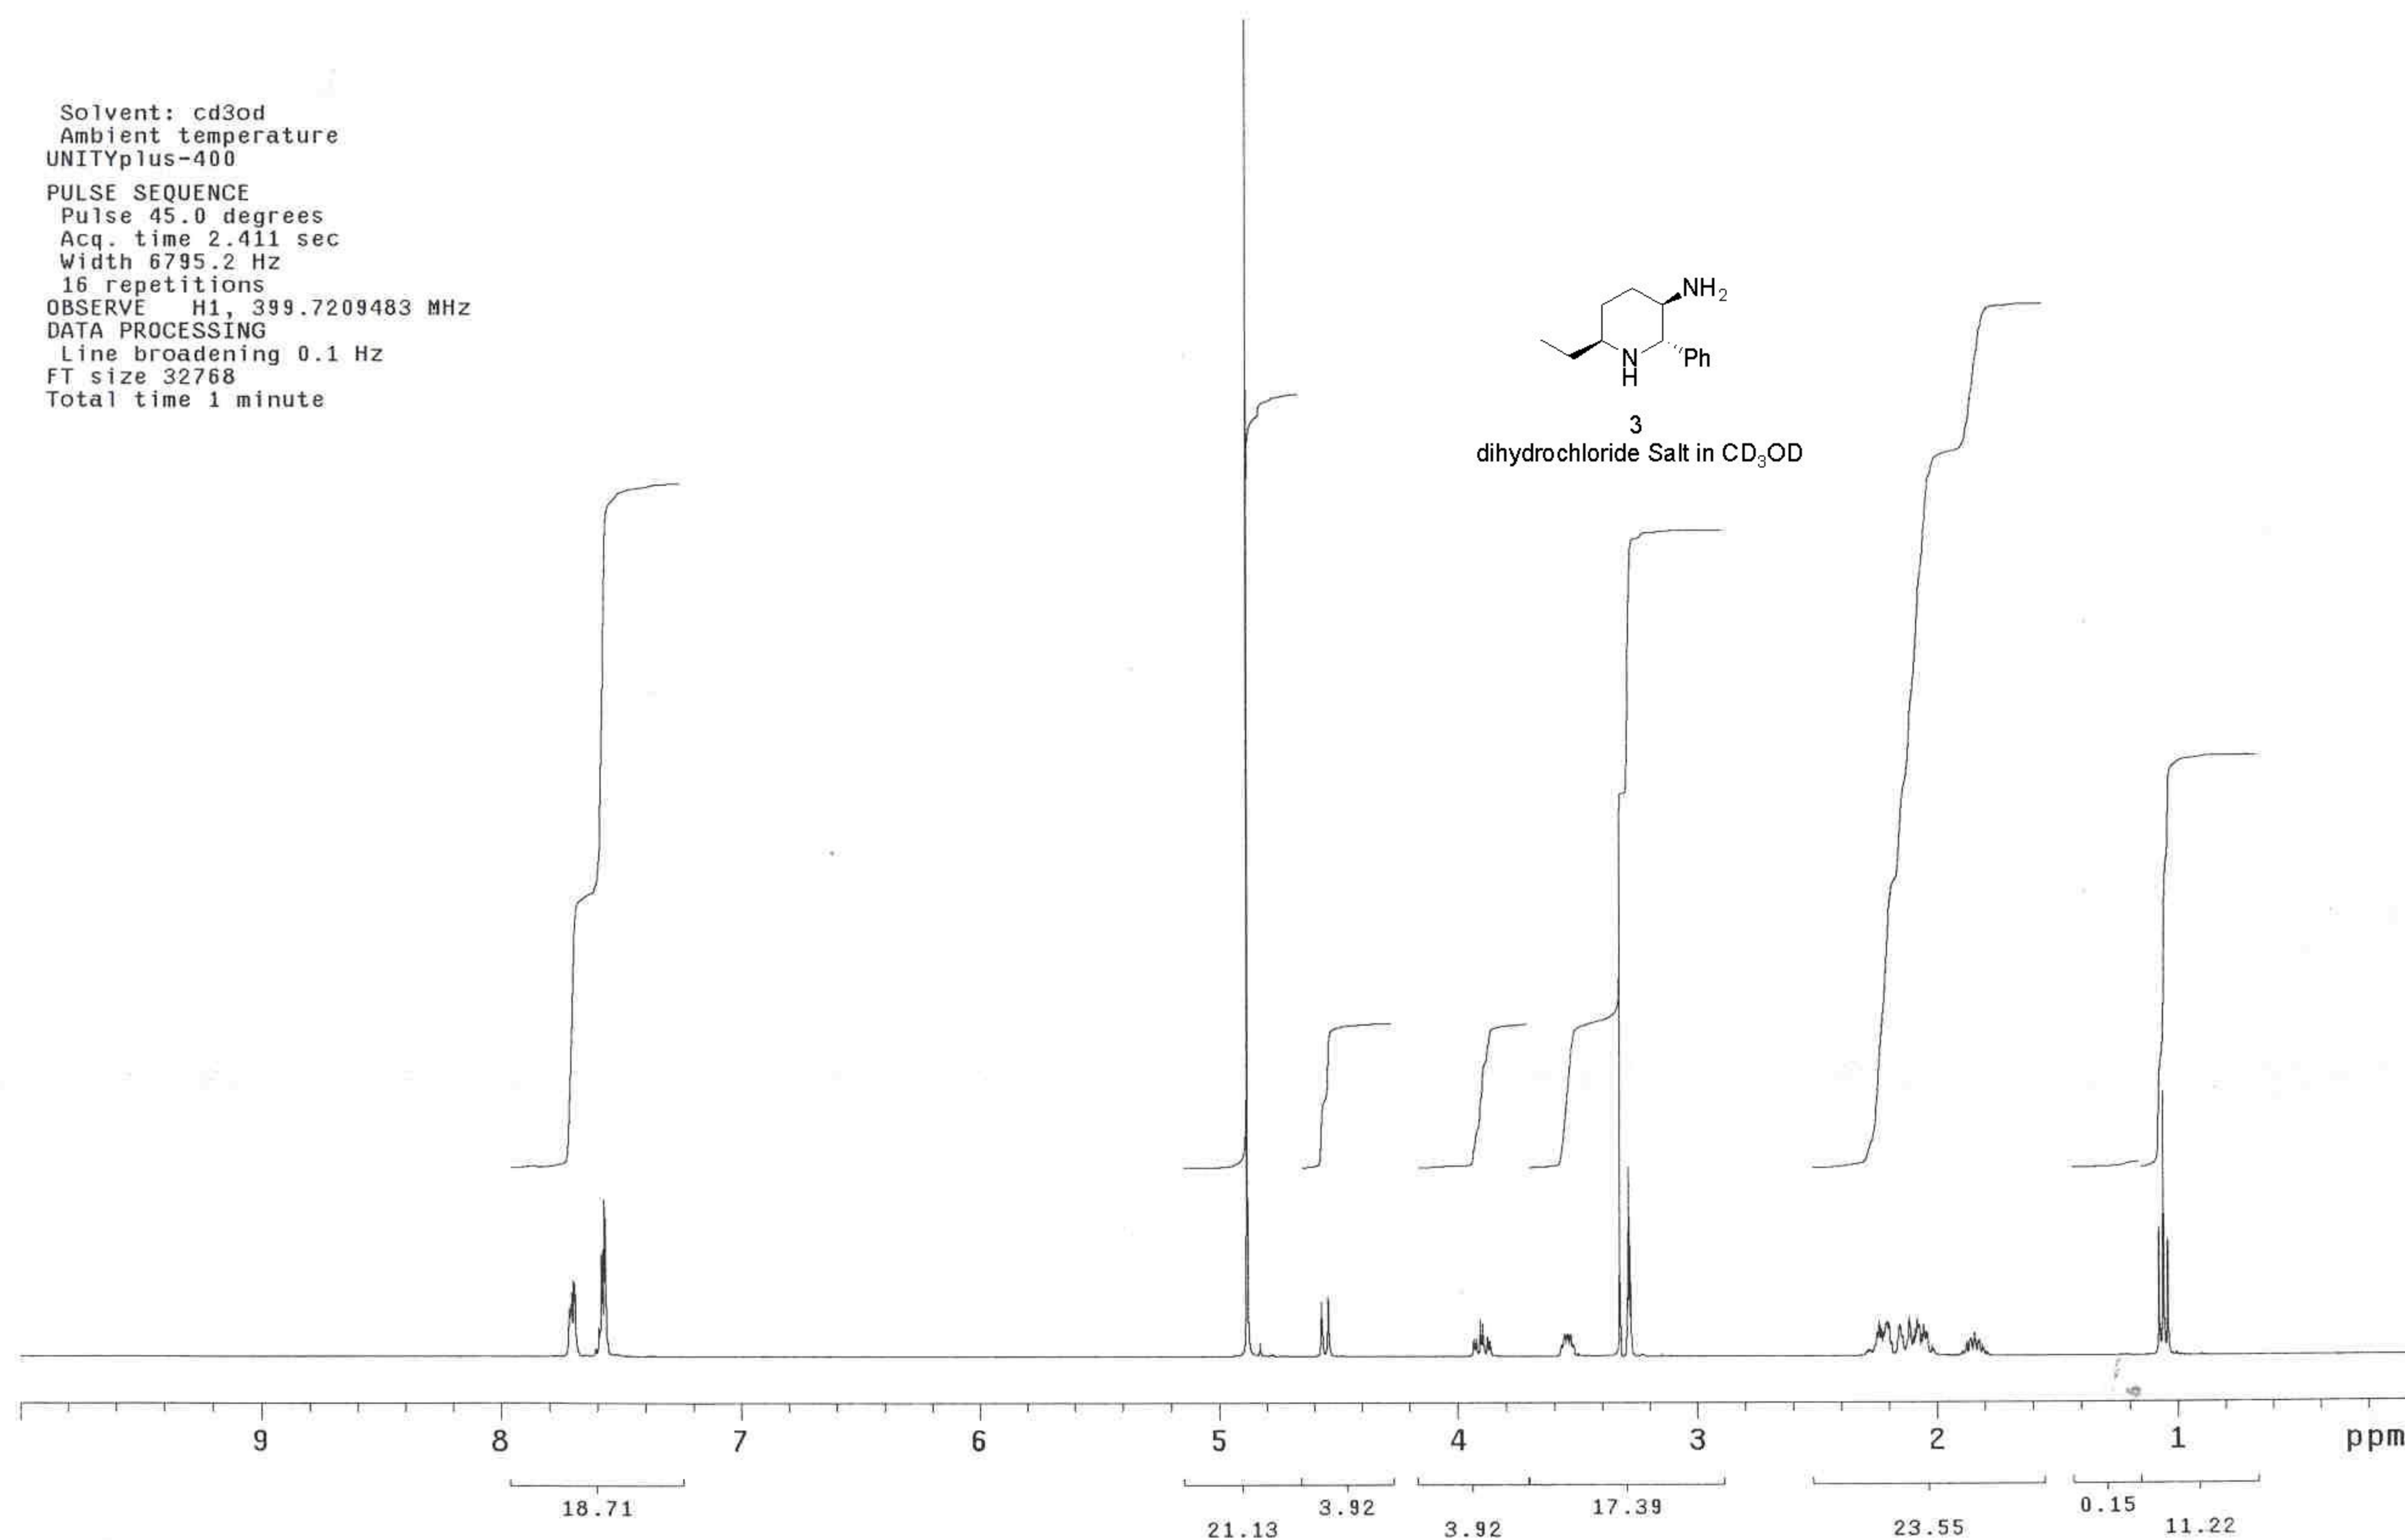

Solvent: d2o  
Ambient temperature  
UNITYplus-400  
PULSE SEQUENCE  
Pulse 45.0 degrees  
Acq. time 2.411 sec  
Width 6795.2 Hz  
16 repetitions  
OBSERVE H1, 399.7204007 MHz  
DATA PROCESSING  
Line broadening 0.1 Hz  
FT size 32768  
Total time 1 minute

Filename: 65808-70-1\_h1.fid

unityn: 041208

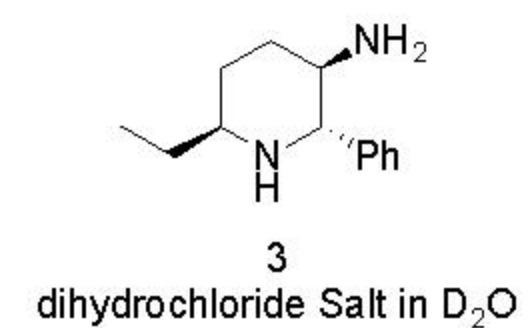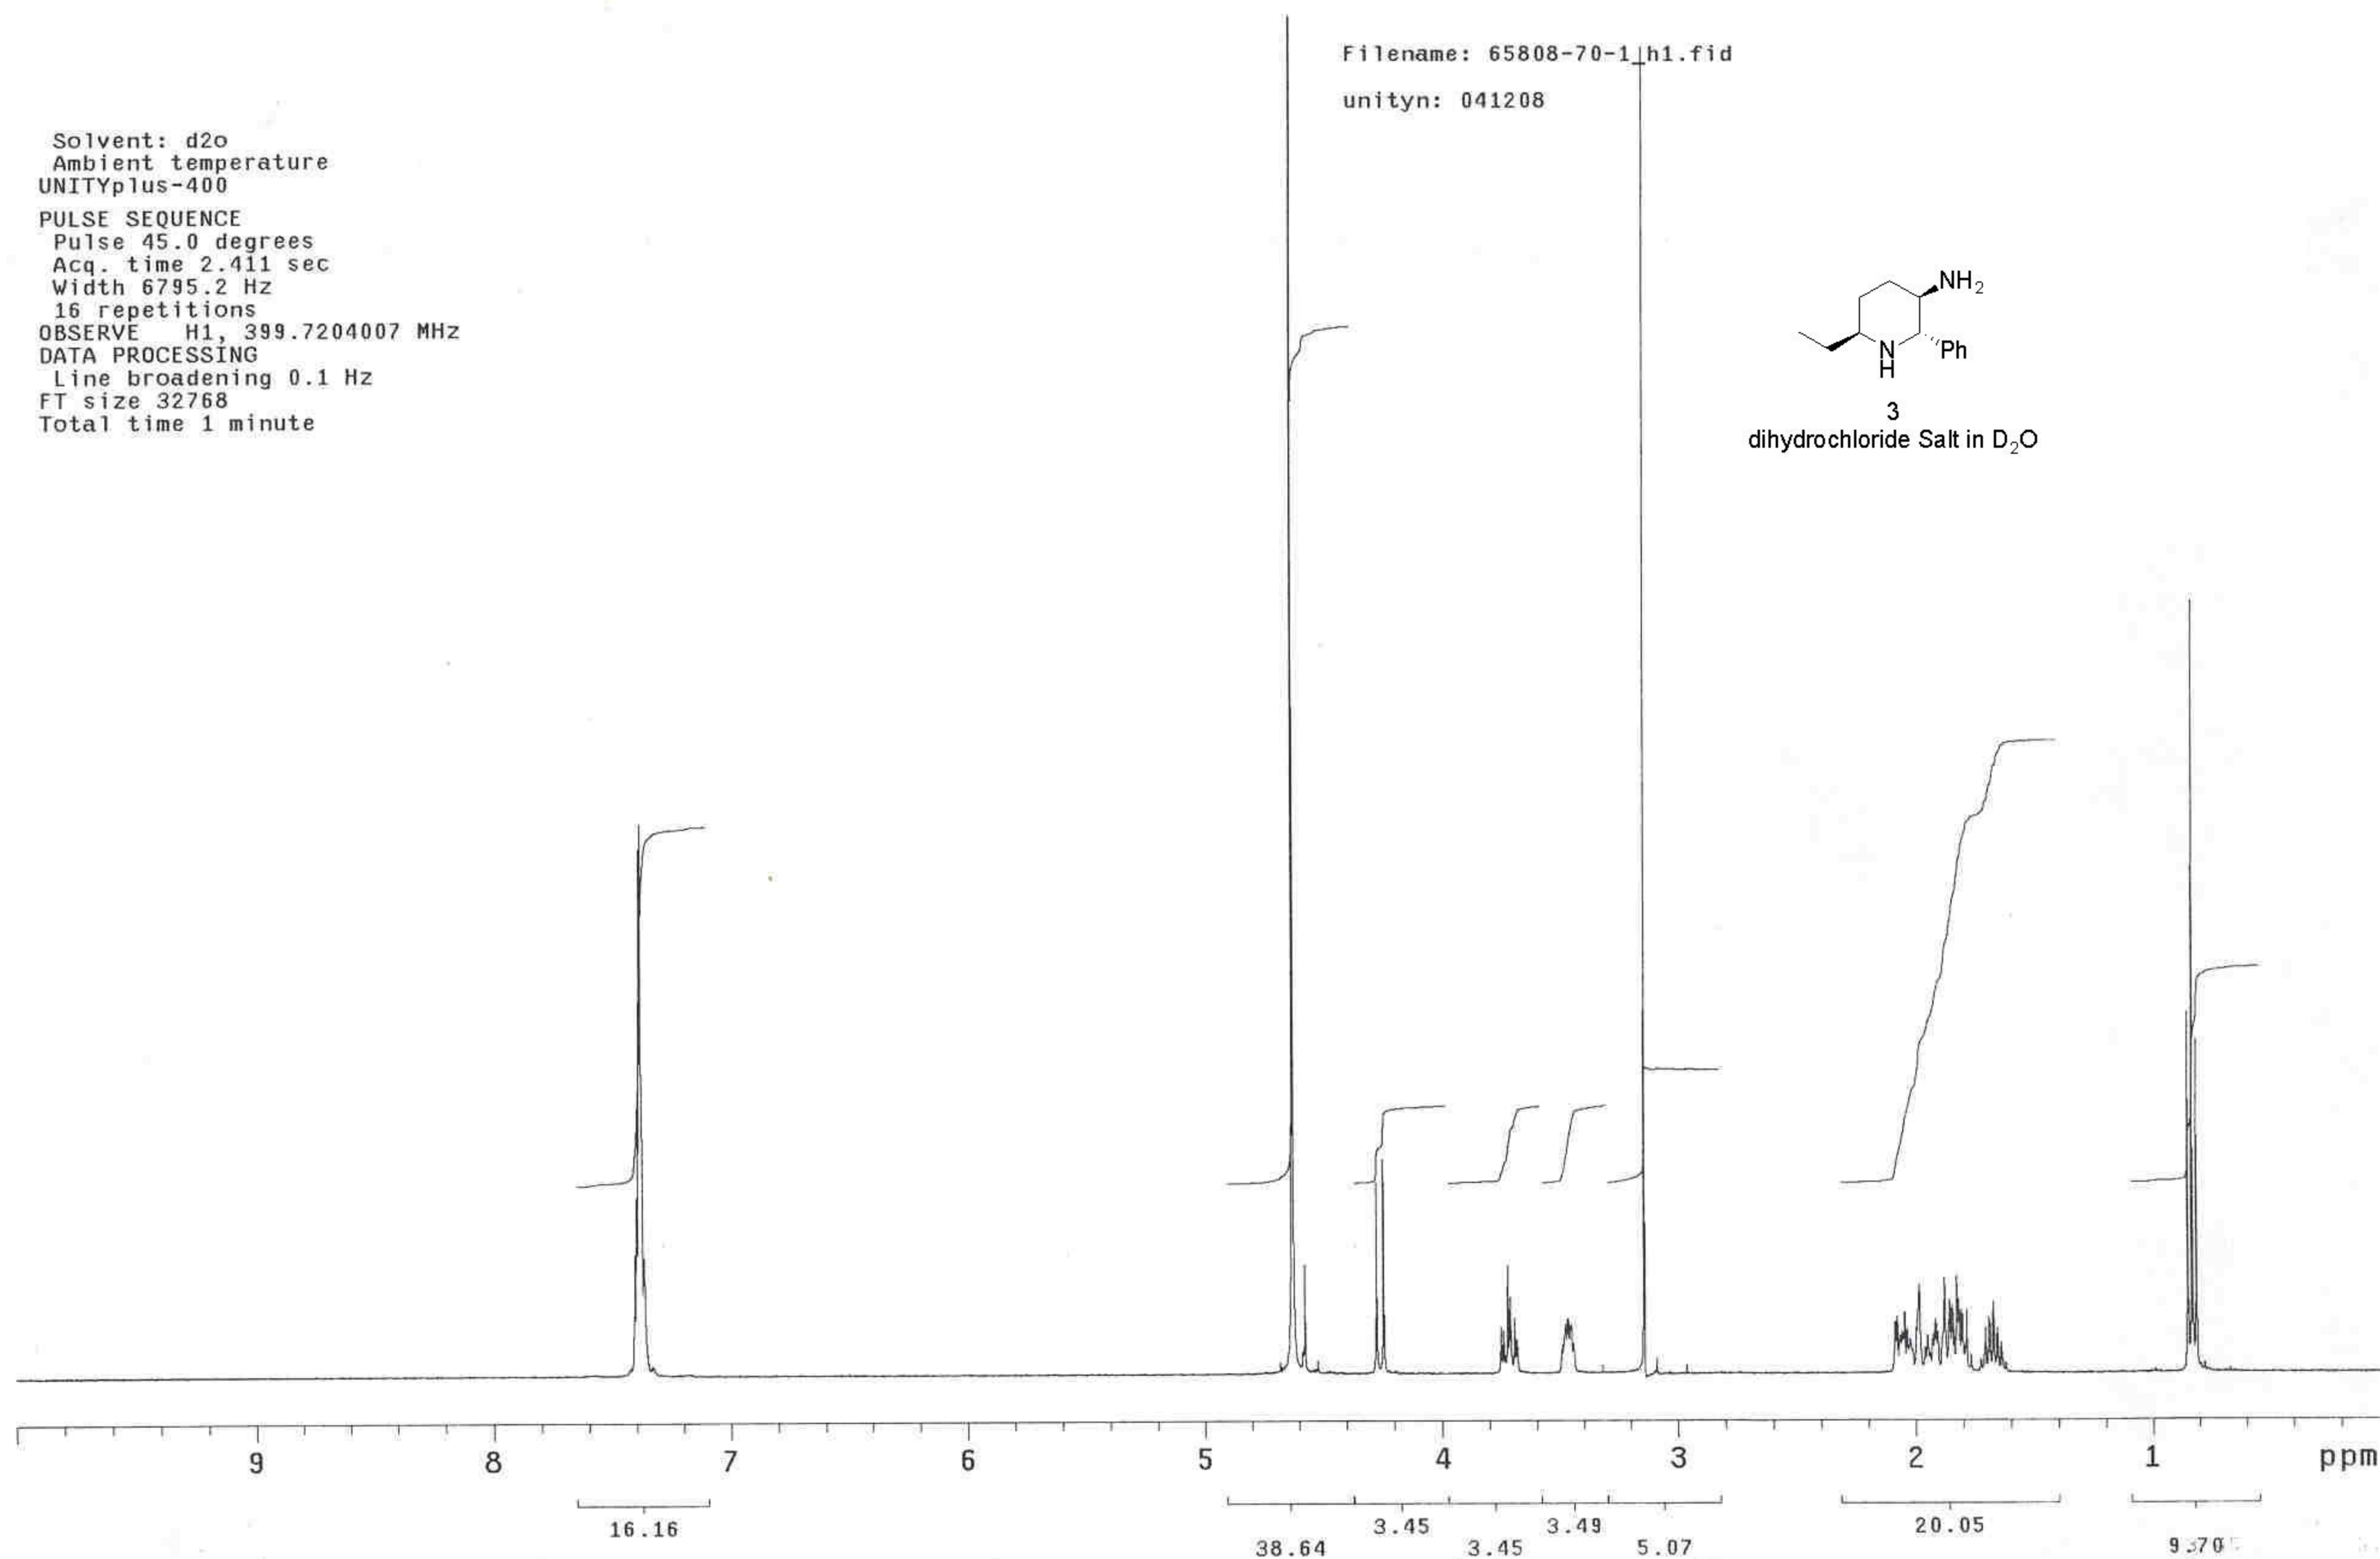

Solvent: cdc13  
Ambient temperature  
UNITYplus-400  
PULSE SEQUENCE  
Pulse 45.0 degrees  
Acq. time 2.411 sec  
Width 6795.2 Hz  
16 repetitions  
OBSERVE H1, 399.7291450 MHz  
DATA PROCESSING  
Line broadening 0.1 Hz  
FT size 32768  
Total time 1 minute

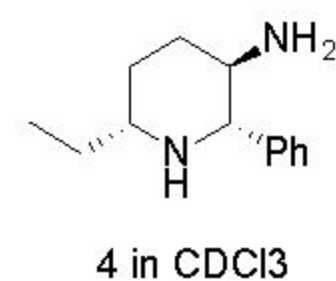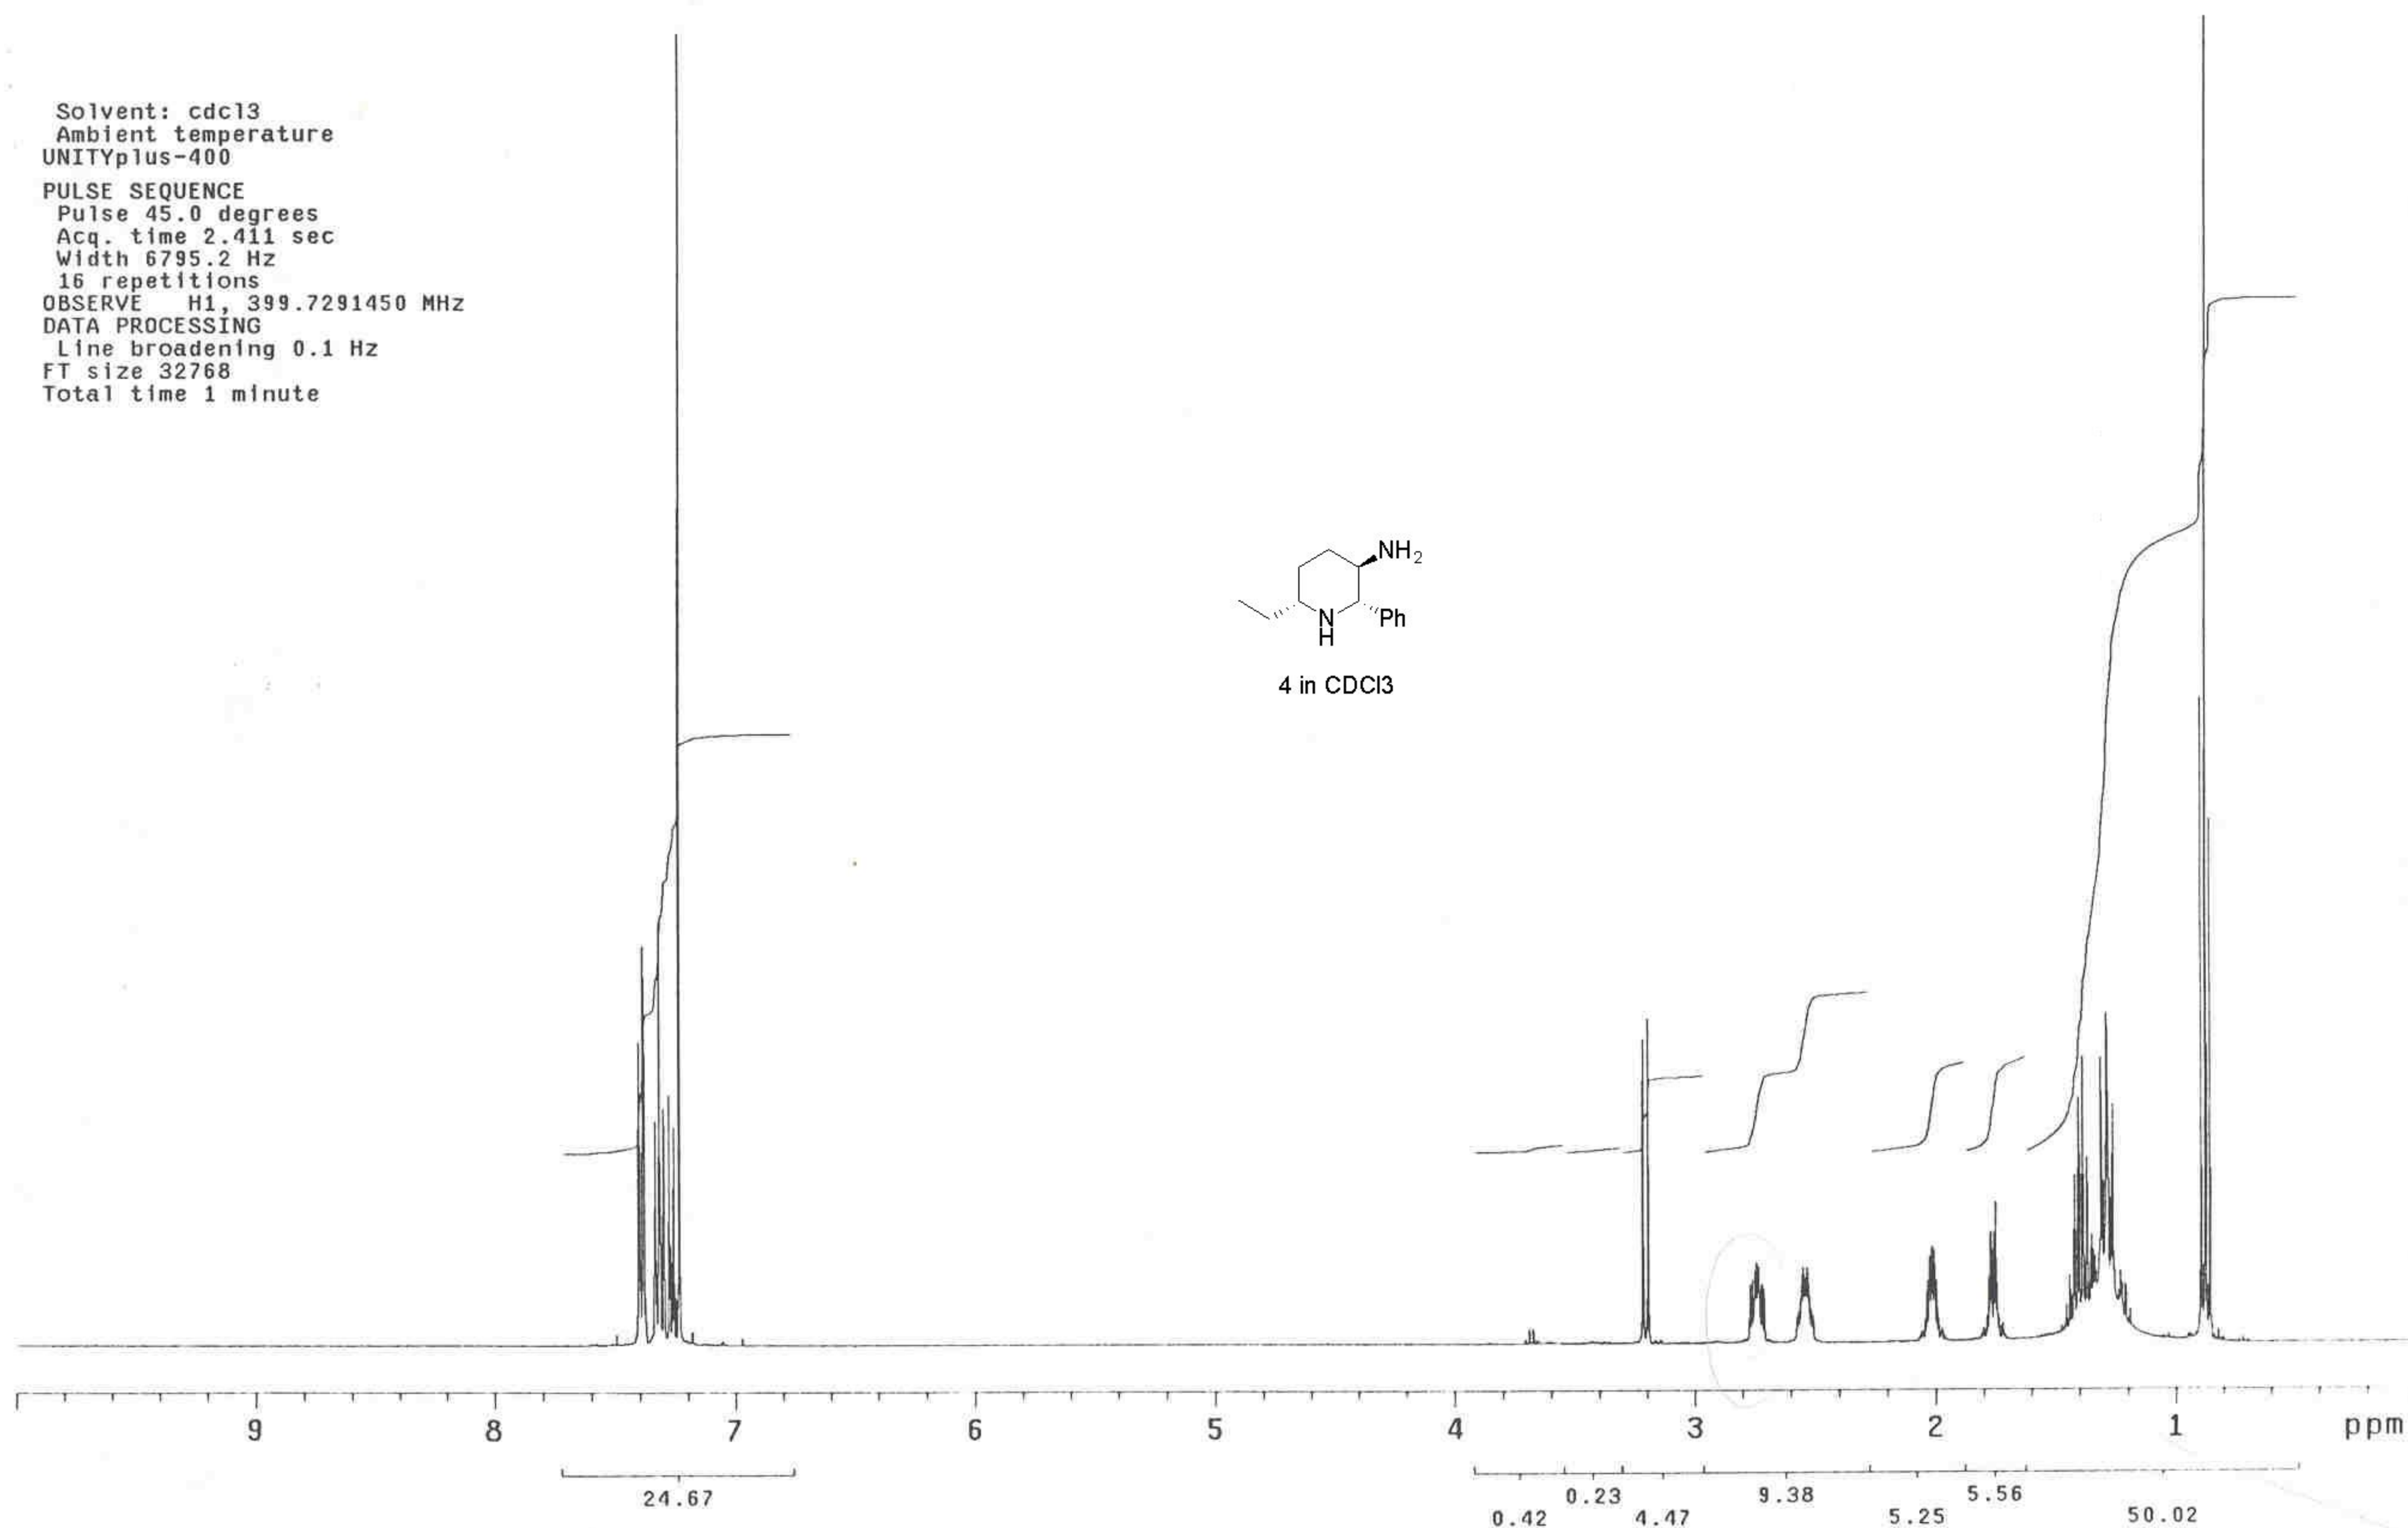



Solvent: d2o  
Ambient temperature  
UNITYplus-400  
PULSE SEQUENCE  
Pulse 45.0 degrees  
Acq. time 2.411 sec  
Width 6795.2 Hz  
16 repetitions  
OBSERVE H1, 399.7301723 MHz  
DATA PROCESSING  
Line broadening 0.1 Hz  
FT size 32768  
Total time 1 minute

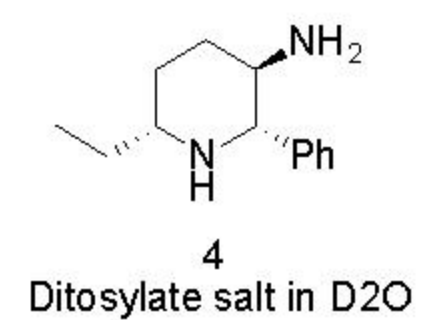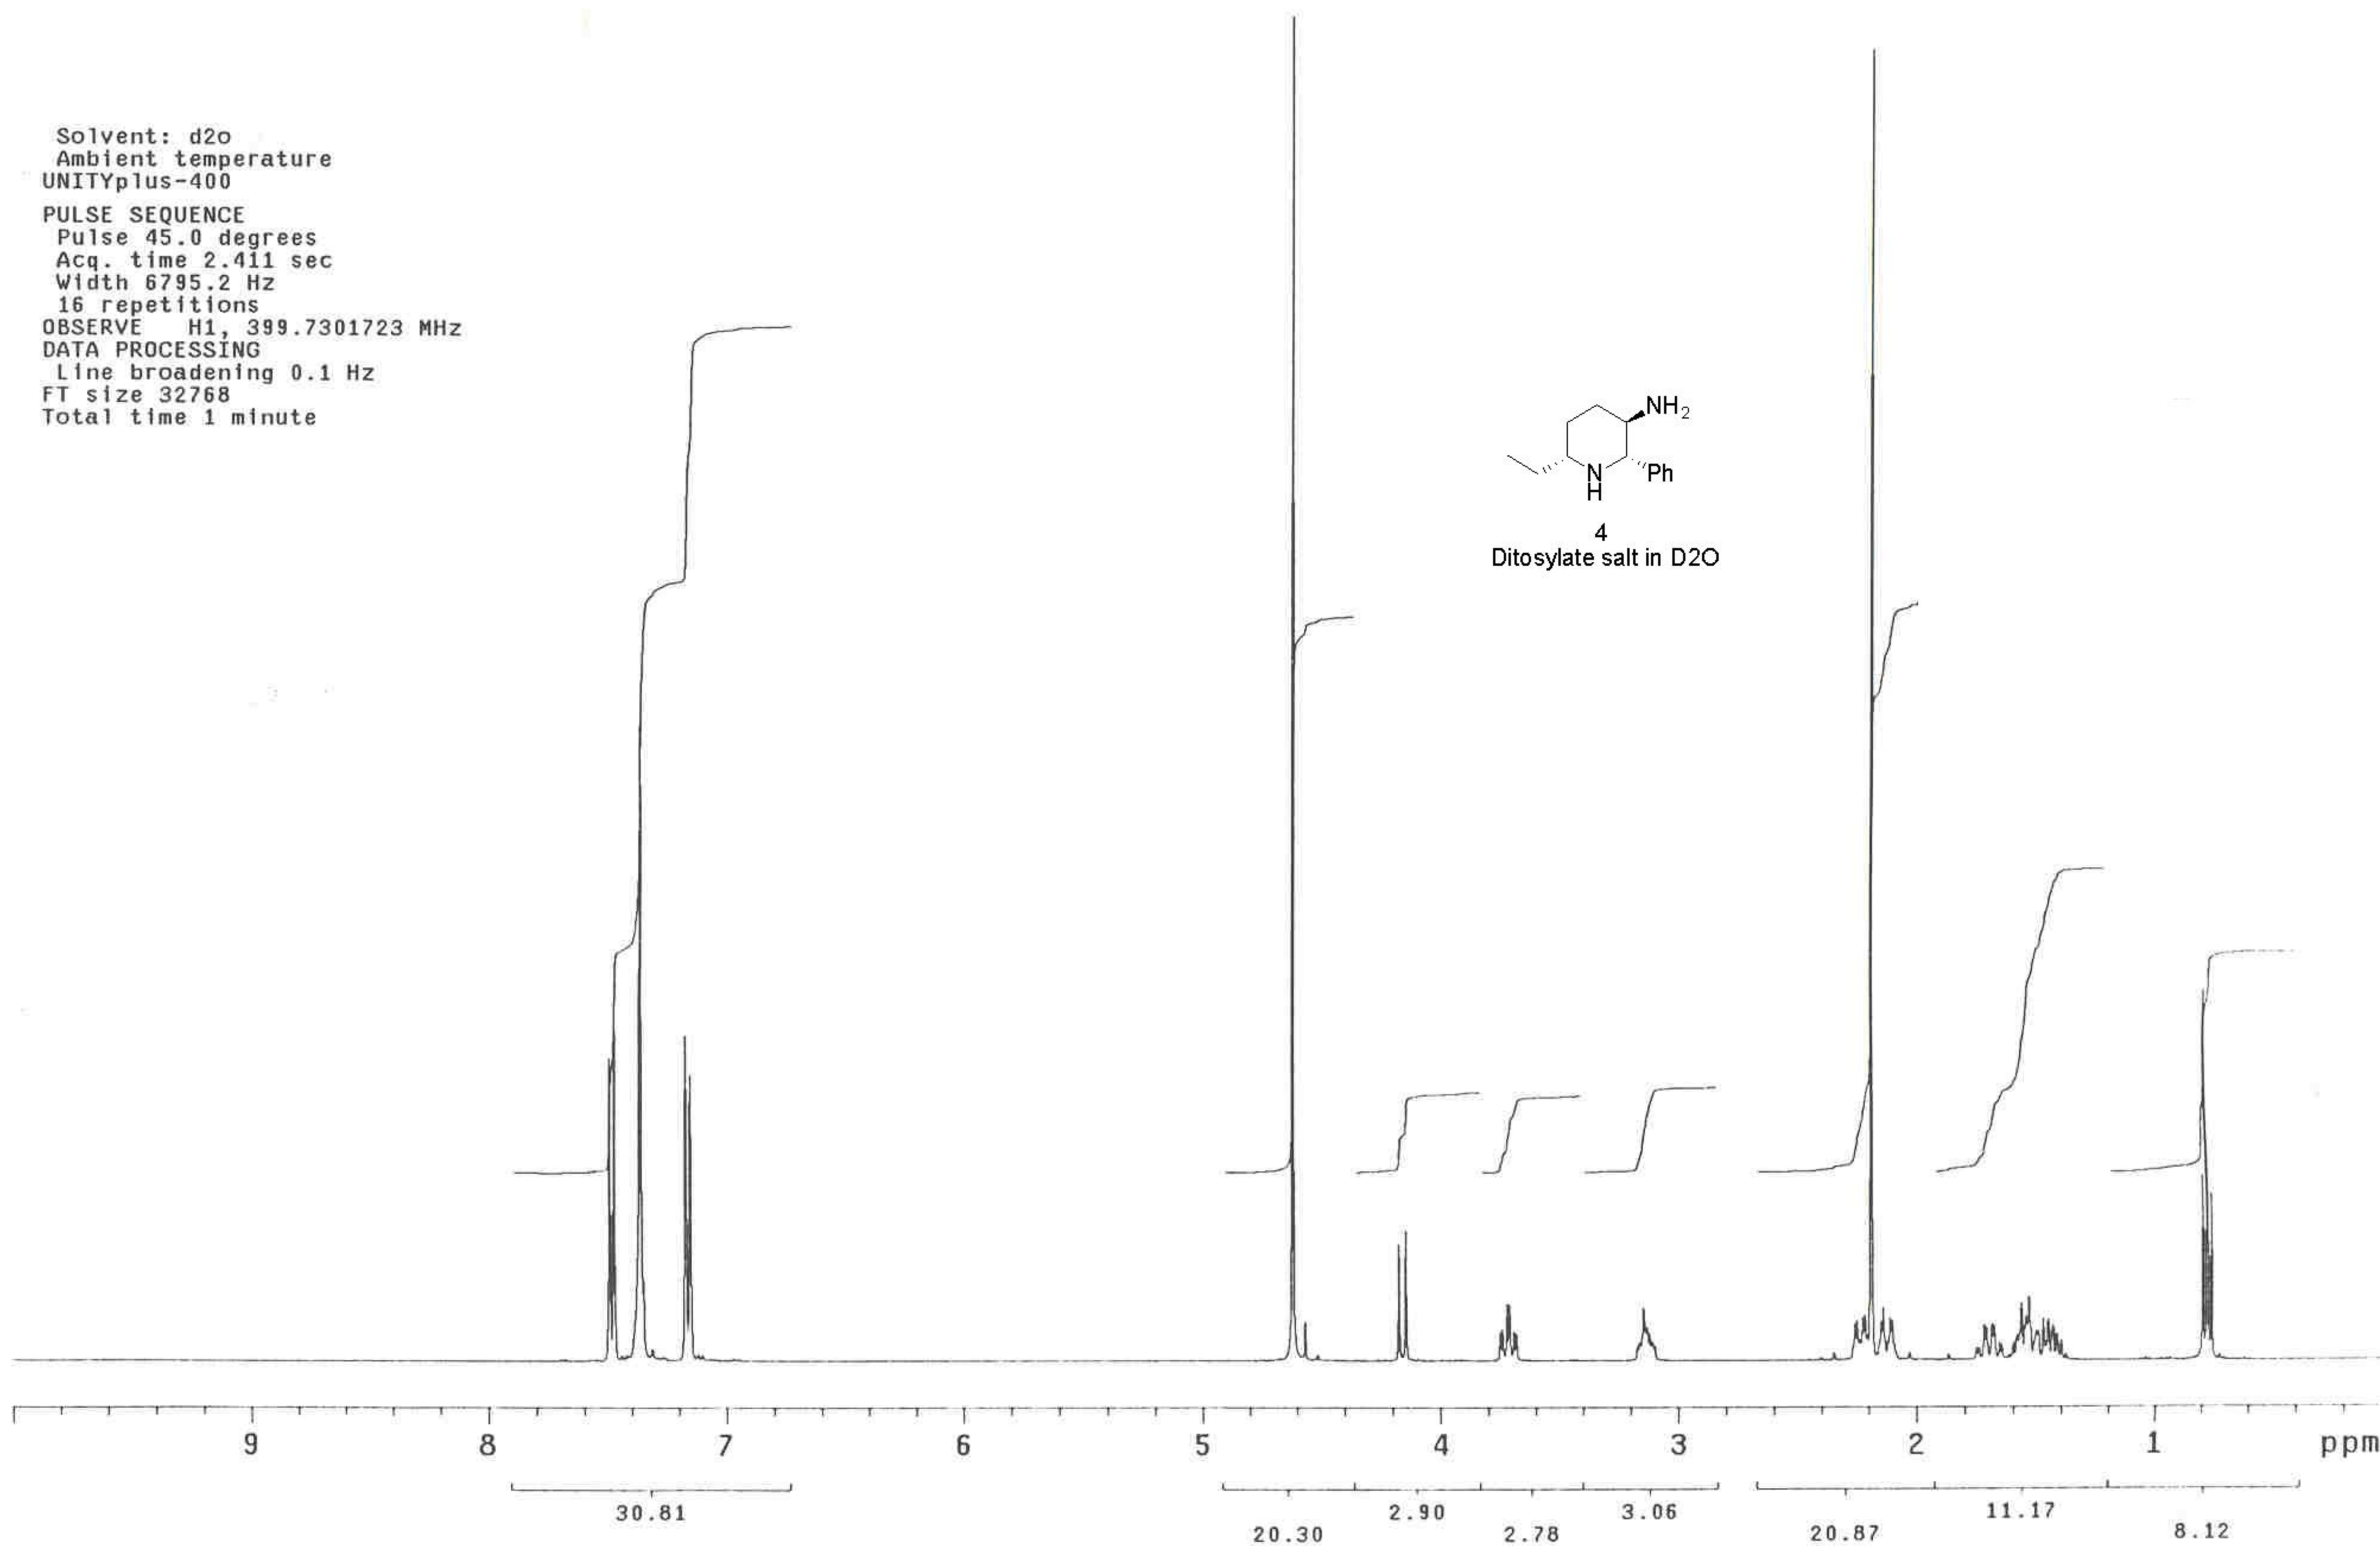

Solvent: cd3od  
Ambient temperature  
Sample #34  
File: 3401  
UNITYplus-400  
PULSE SEQUENCE  
Pulse 45.0 degrees  
Acq. time 2.410 sec  
Width 6798.1 Hz  
32 repetitions  
OBSERVE H1, 399.8930152 MHz  
DATA PROCESSING  
Line broadening 0.1 Hz  
FT size 32768  
Total time 1 minute

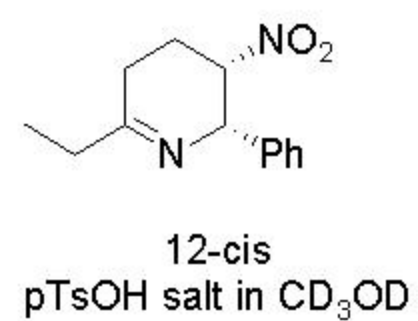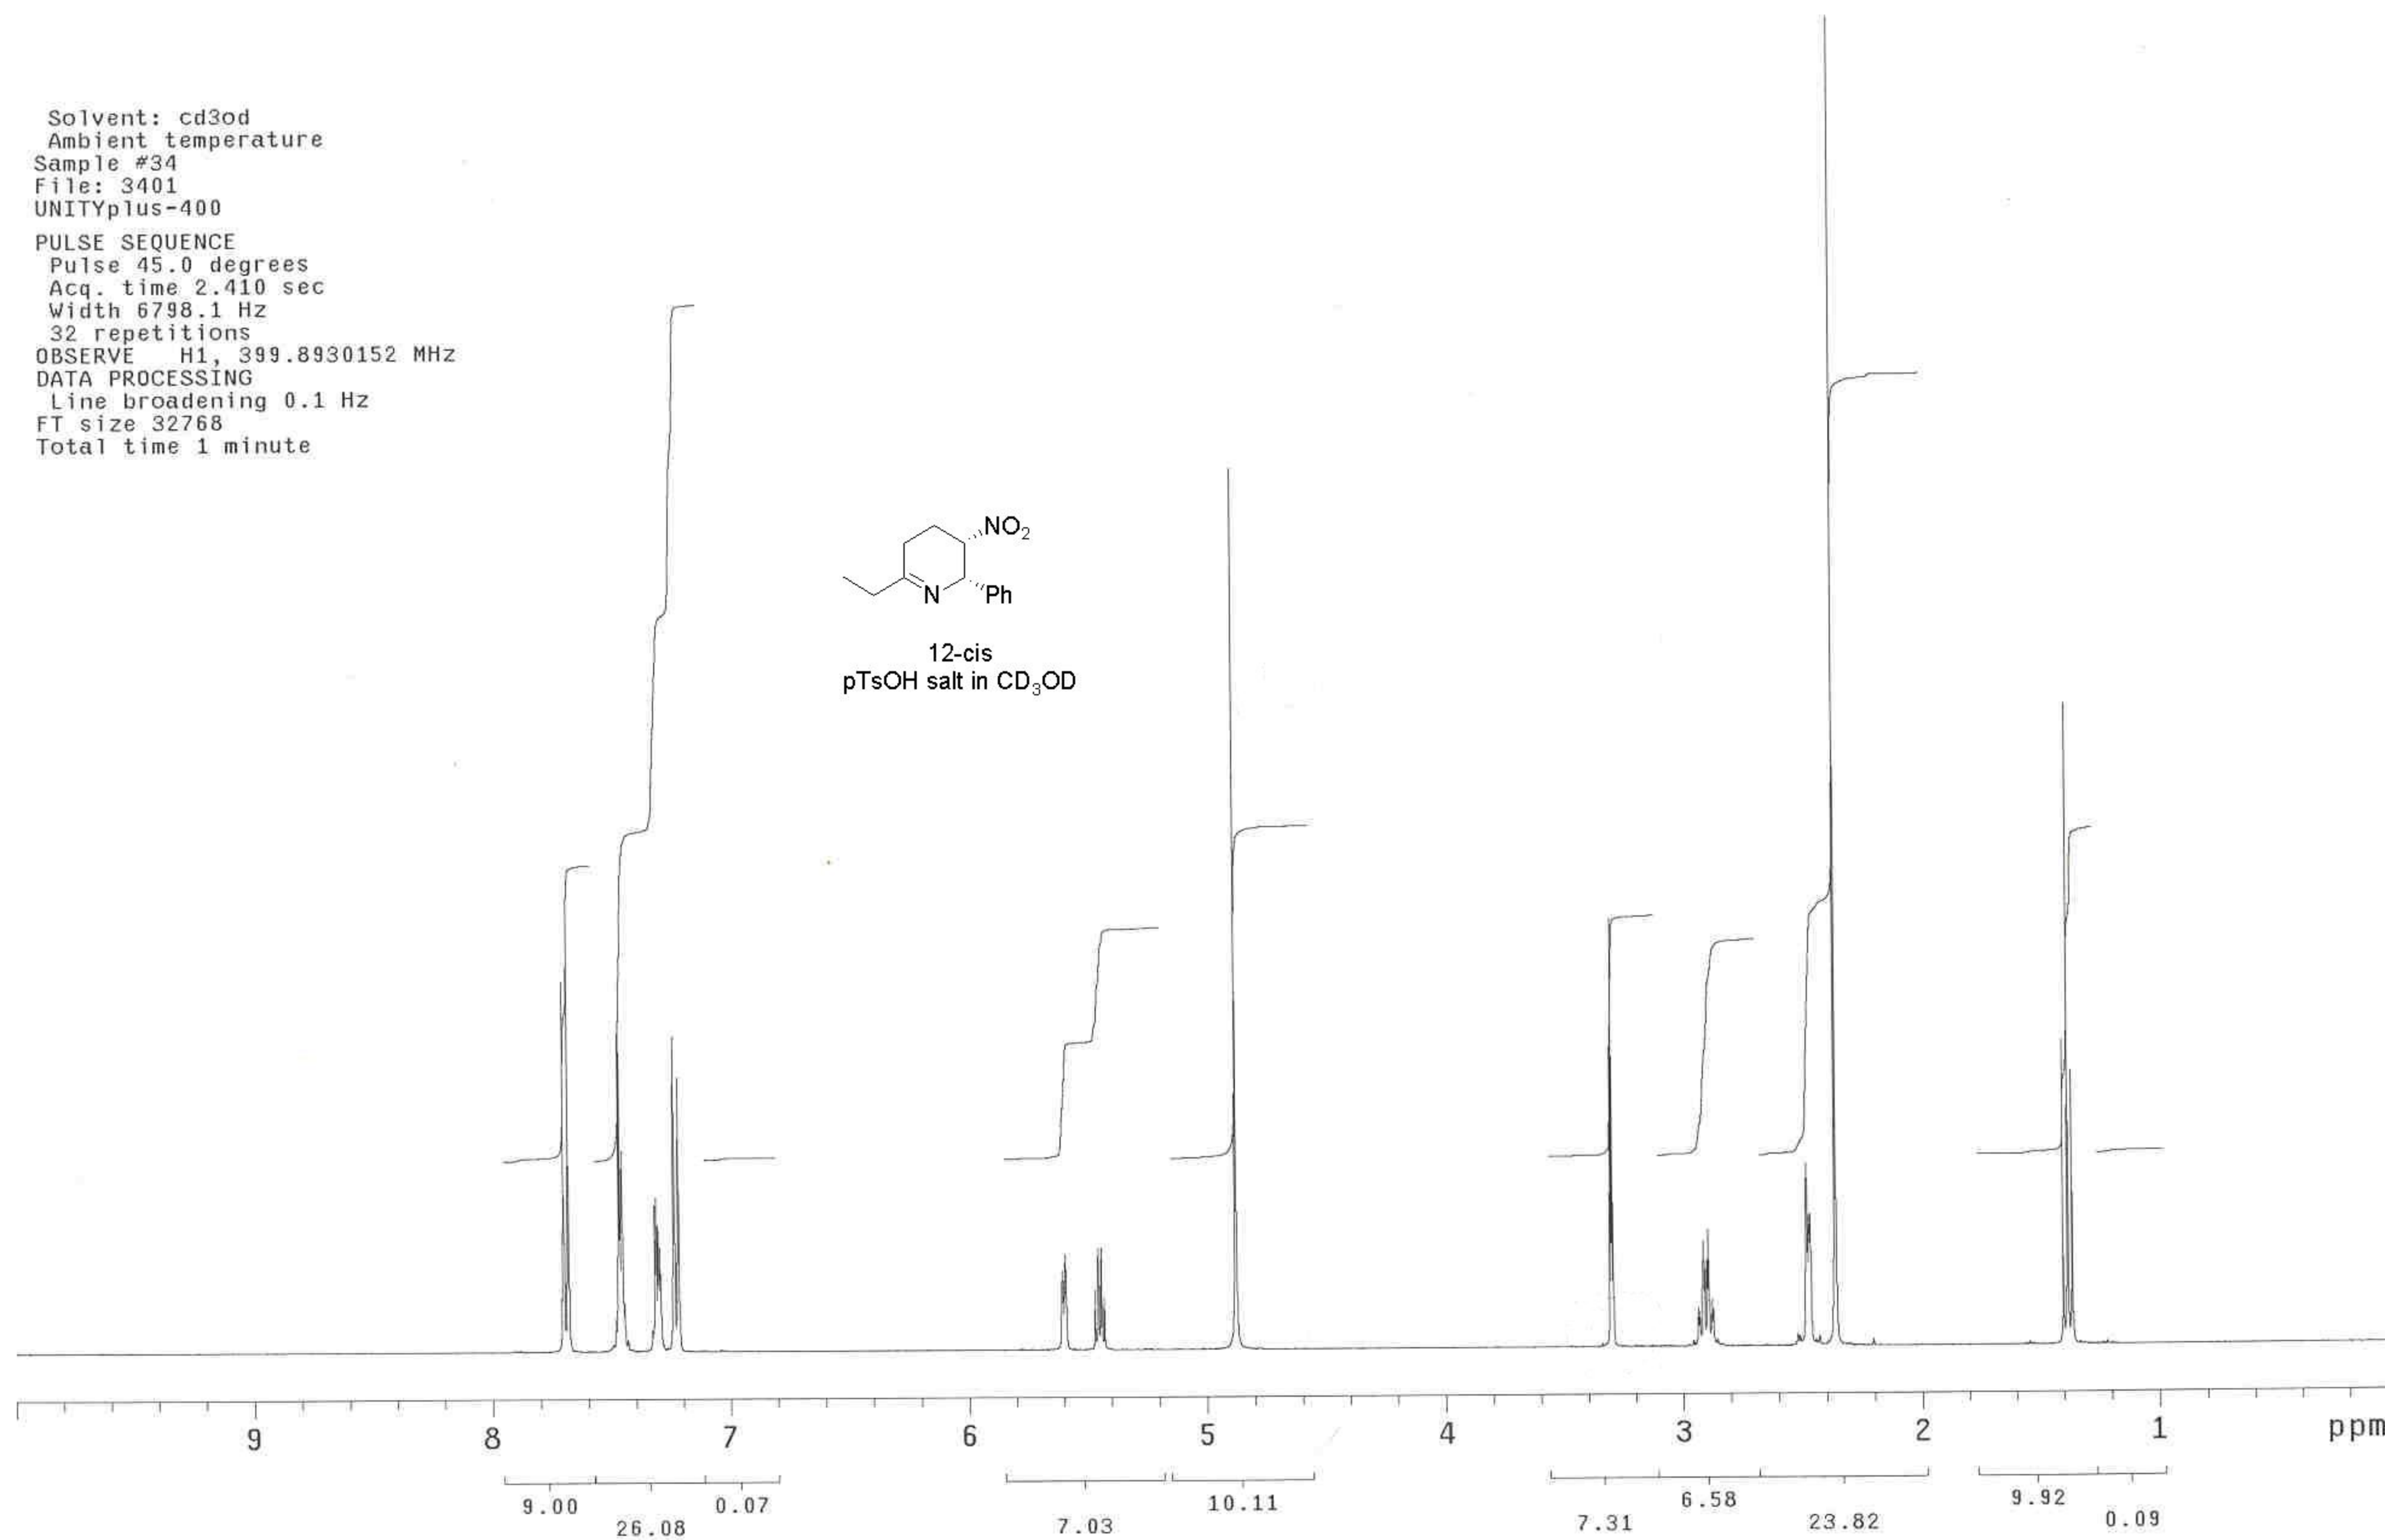

Solvent: cd3od  
Ambient temperature  
UNITYplus-400

PULSE SEQUENCE

Pulse 45.0 degrees  
Acq. time 2.412 sec  
Width 6794.1 Hz  
16 repetitions

OBSERVE H1, 399.6571074 MHz

DATA PROCESSING

Line broadening 0.1 Hz  
FT size 32768  
Total time 1 minute

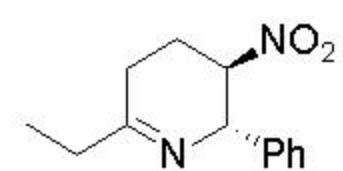

12-trans  
pTsOH salt in CD<sub>3</sub>OD

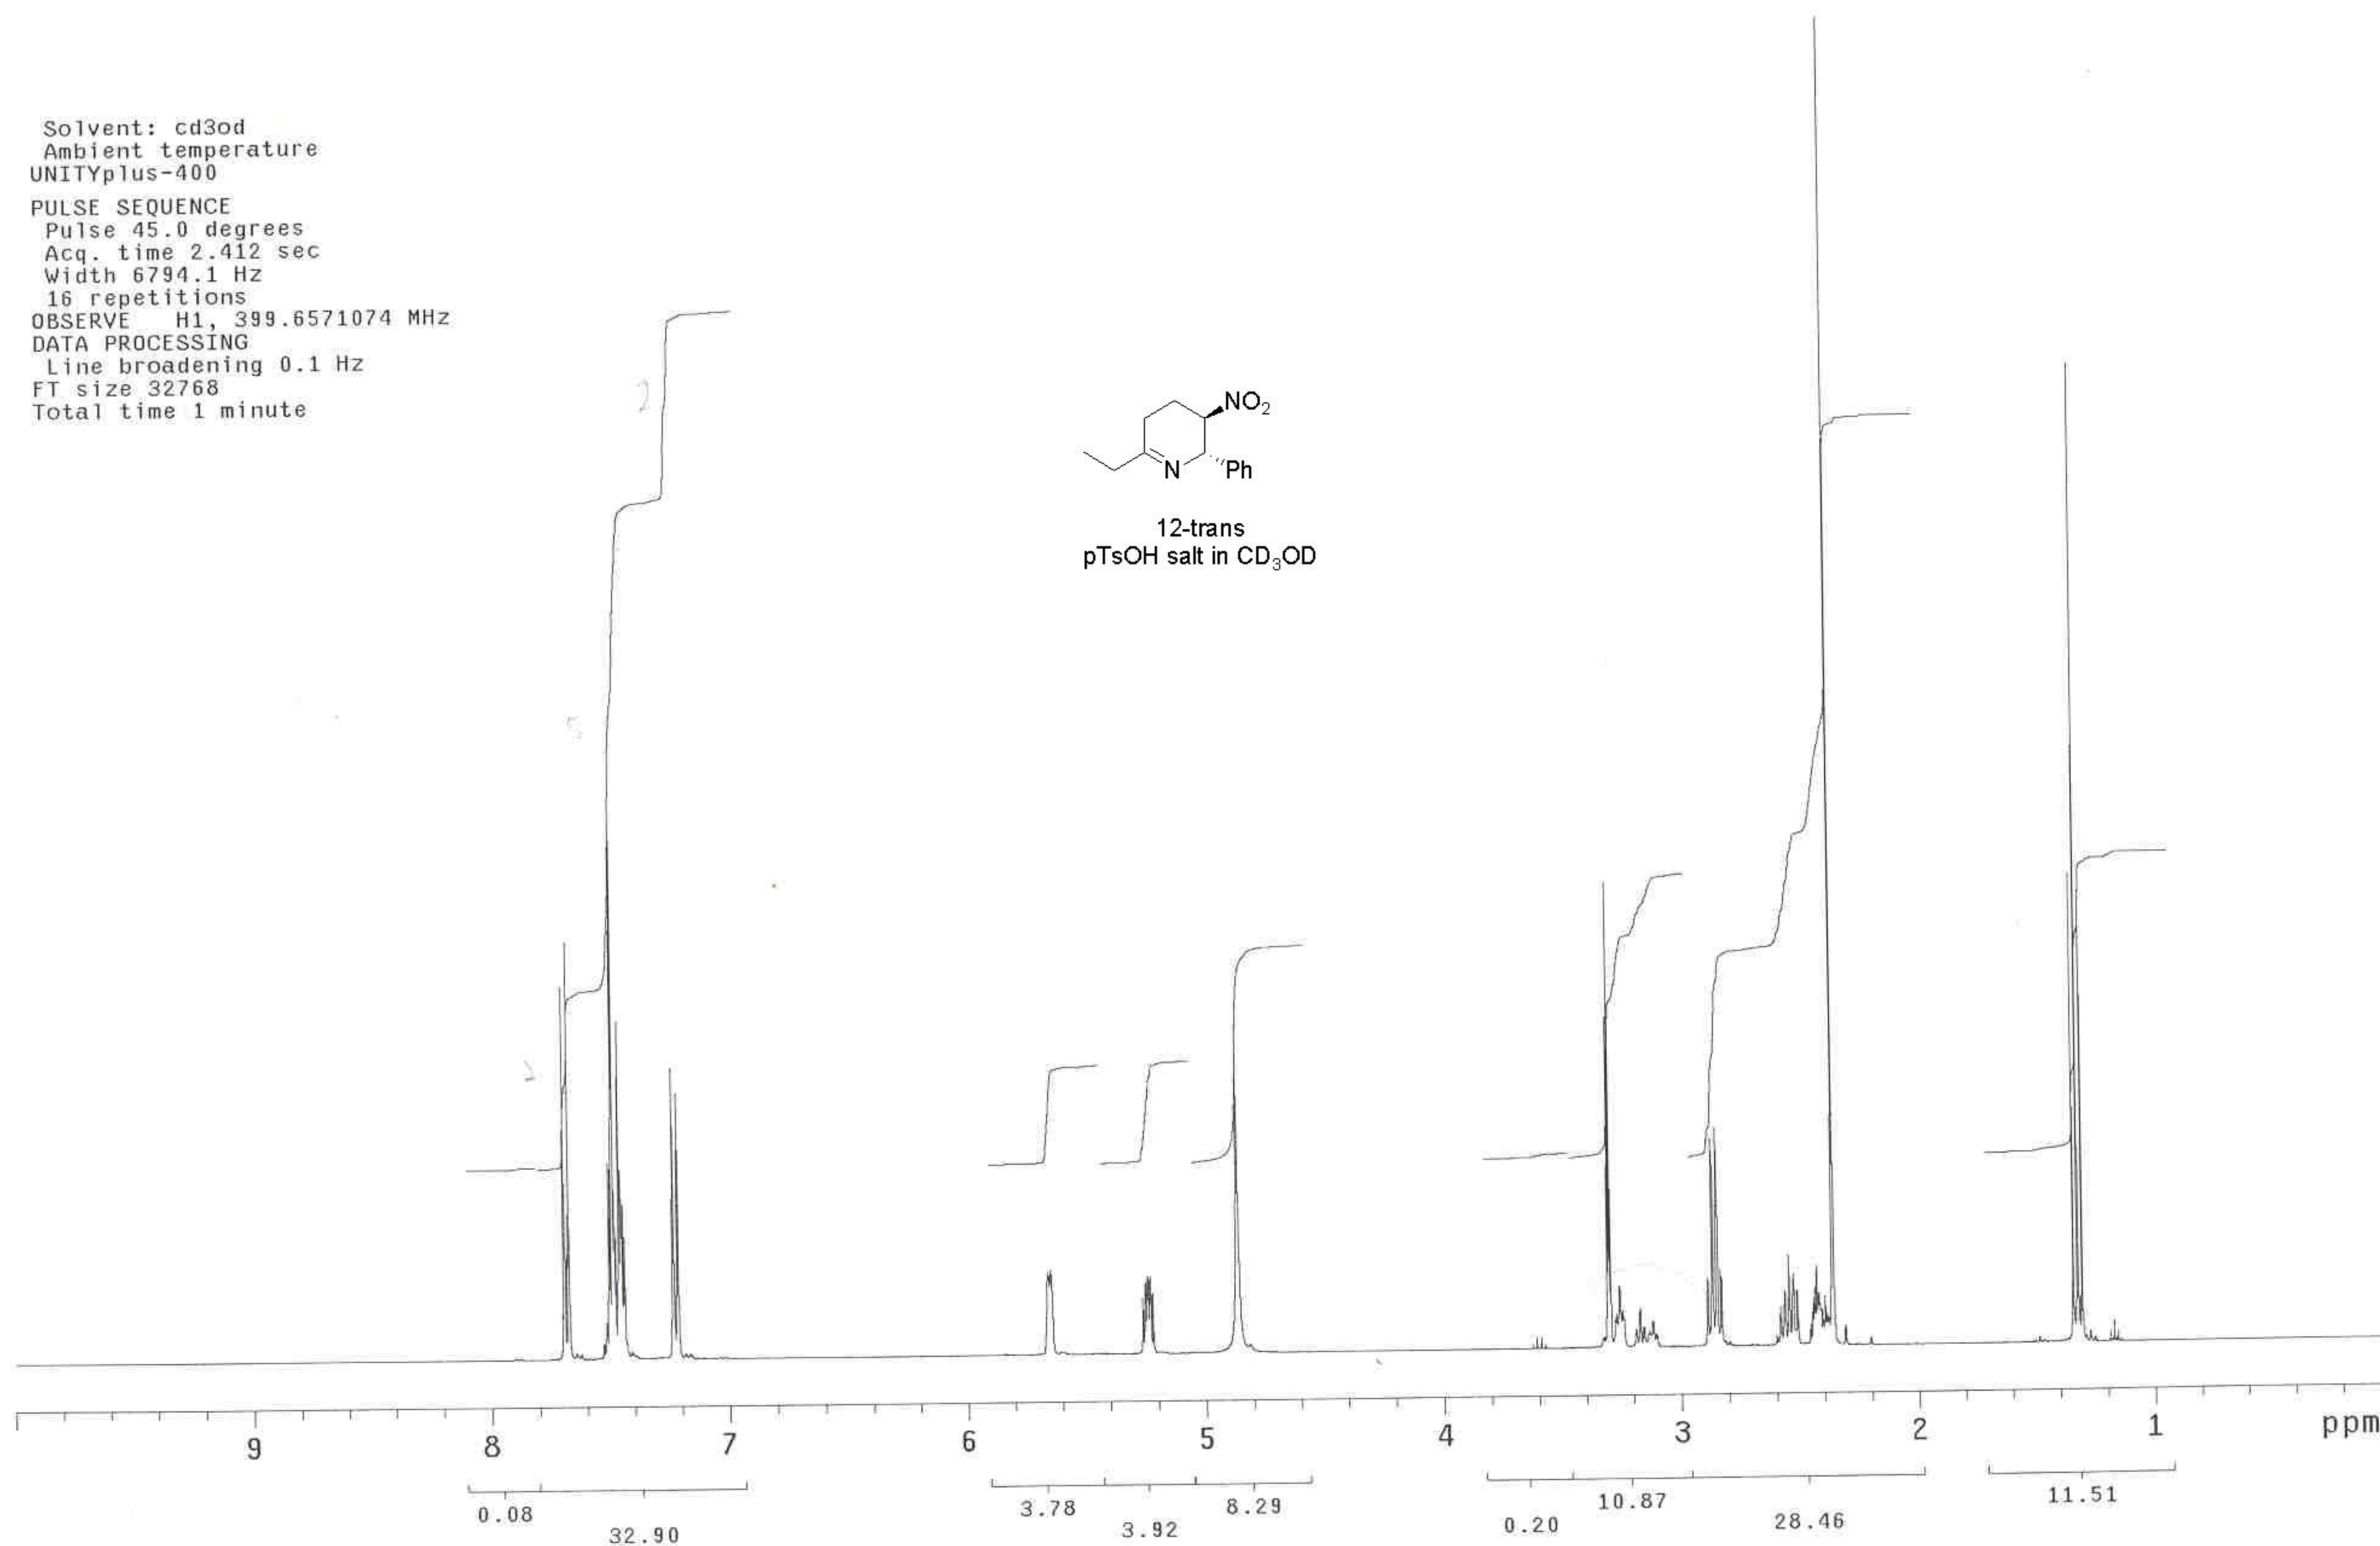

Solvent: cdc13  
Ambient temperature  
UNITYplus-400  
PULSE SEQUENCE  
Pulse 45.0 degrees  
Acq. time 2.411 sec  
Width 6795.2 Hz  
16 repetitions  
OBSERVE H1, 399.7291450 MHz  
DATA PROCESSING  
Line broadening 0.1 Hz  
FT size 32768  
Total time 1 minute

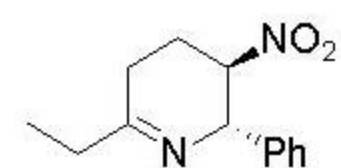

12-trans  
Free base in CDCl<sub>3</sub>

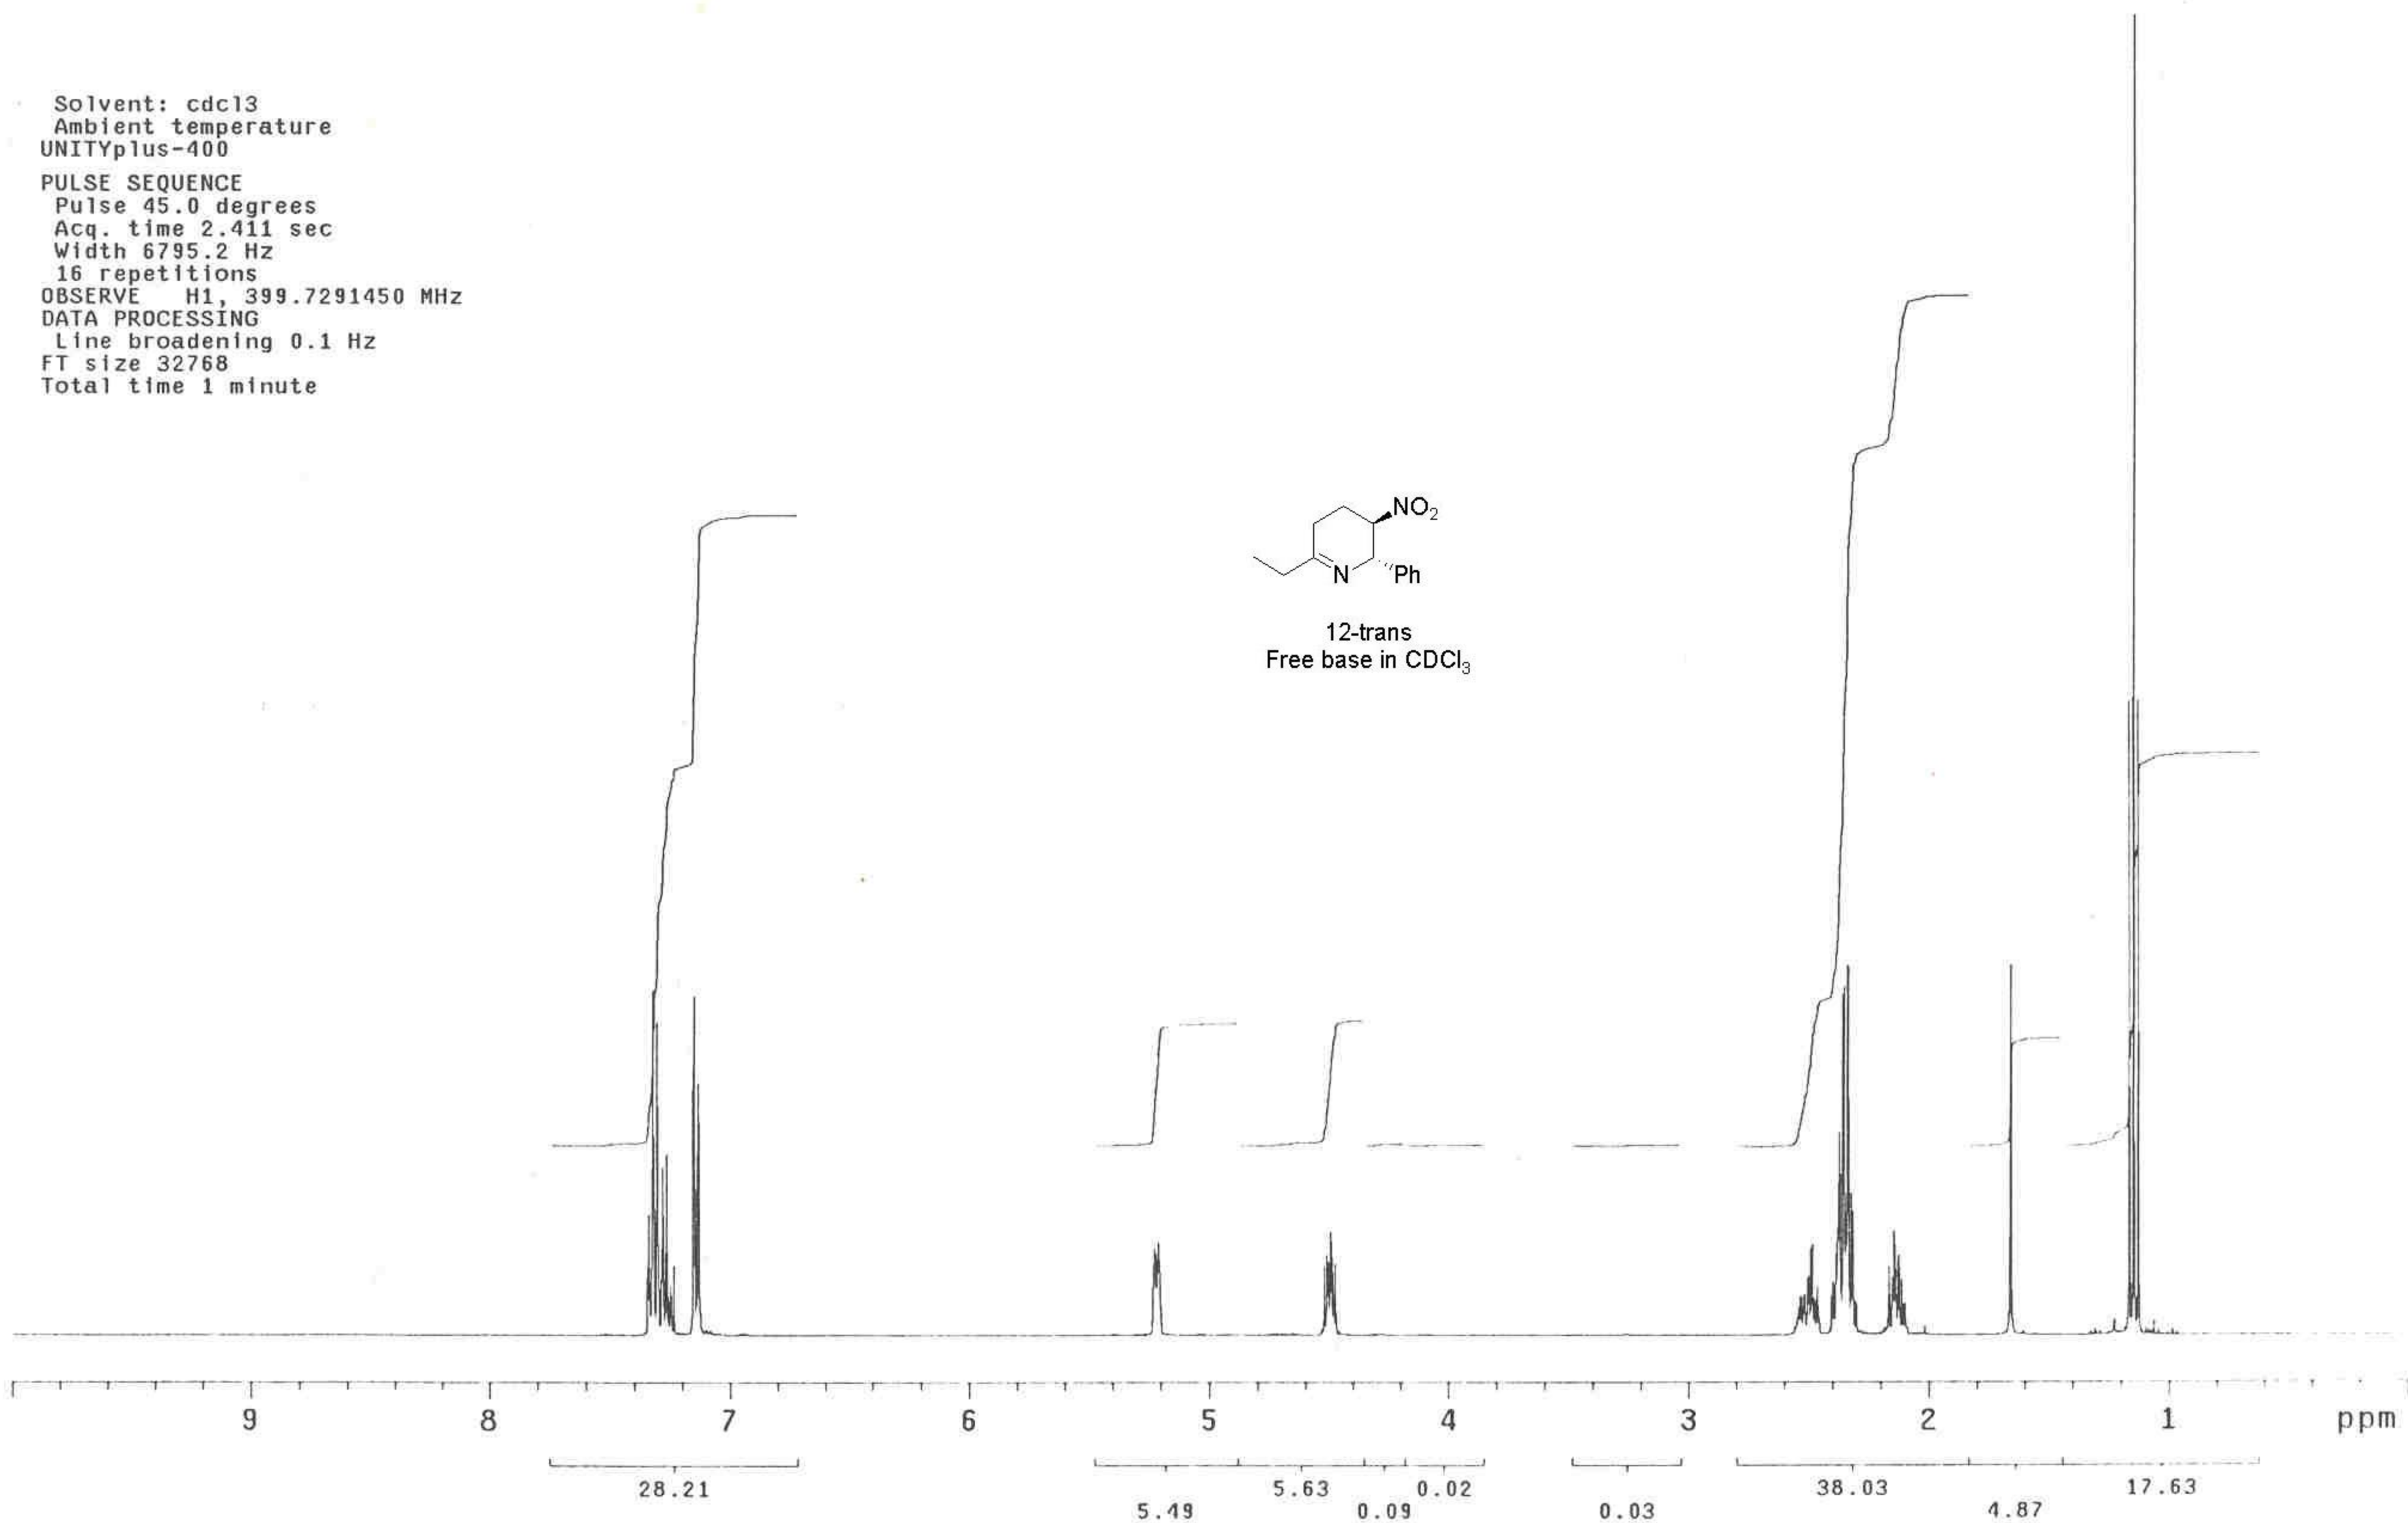



Solvent: dmsO  
Ambient temperature  
UNITYplus-400  
PULSE SEQUENCE  
Pulse 45.0 degrees  
Acq. time 2.412 sec  
Width 6794.1 Hz  
16 repetitions  
OBSERVE H1, 399.6574312 MHz  
DATA PROCESSING  
Line broadening 0.1 Hz  
FT size 32768  
Total time 1 minute

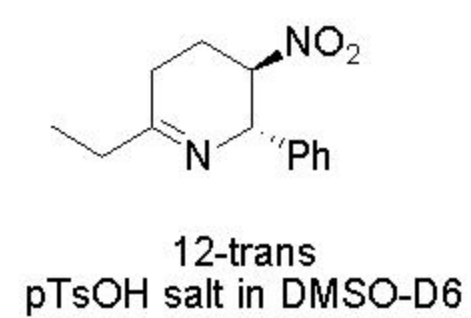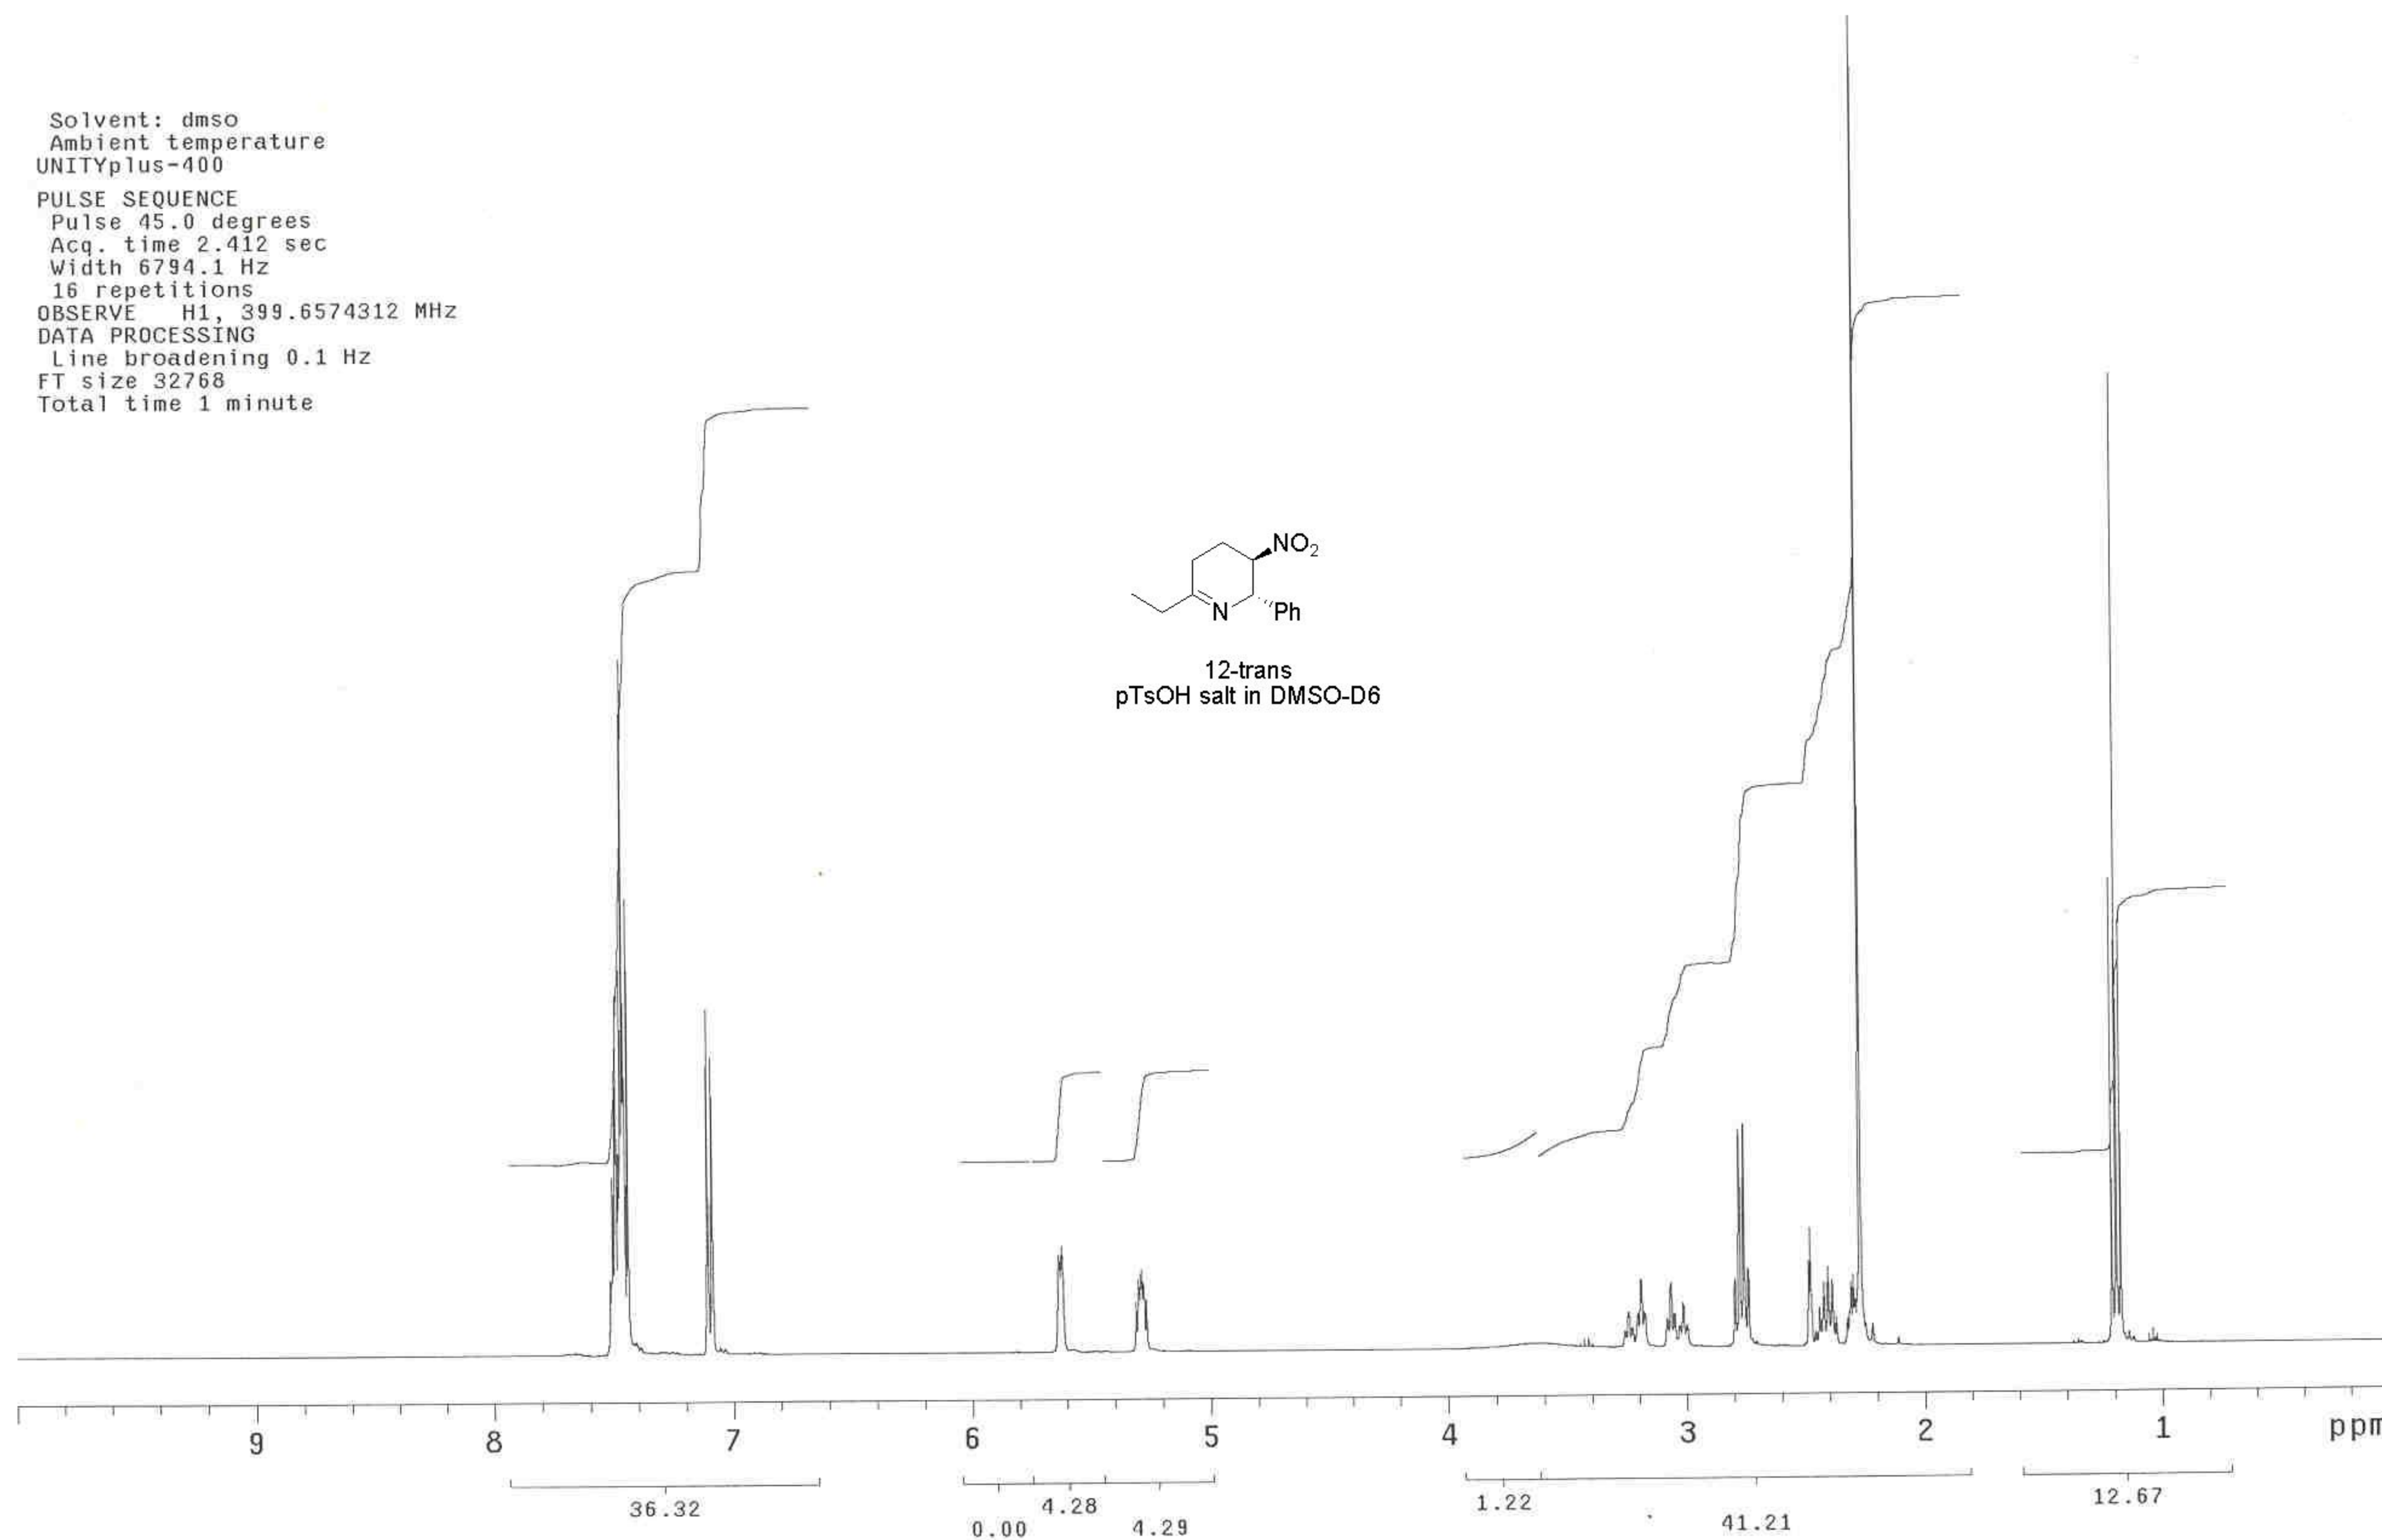

Solvent: cdc13  
Ambient temperature  
UNITYplus-400  
PULSE SEQUENCE  
Pulse 45.0 degrees  
Acq. time 2.411 sec  
Width 6795.2 Hz  
16 repetitions  
OBSERVE H1, 399.7291450 MHz  
DATA PROCESSING  
Line broadening 0.1 Hz  
FT size 32768  
Total time 1 minute

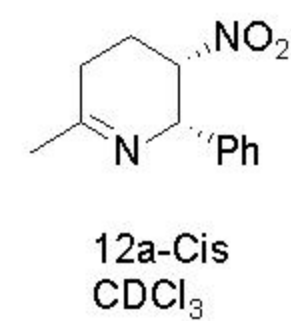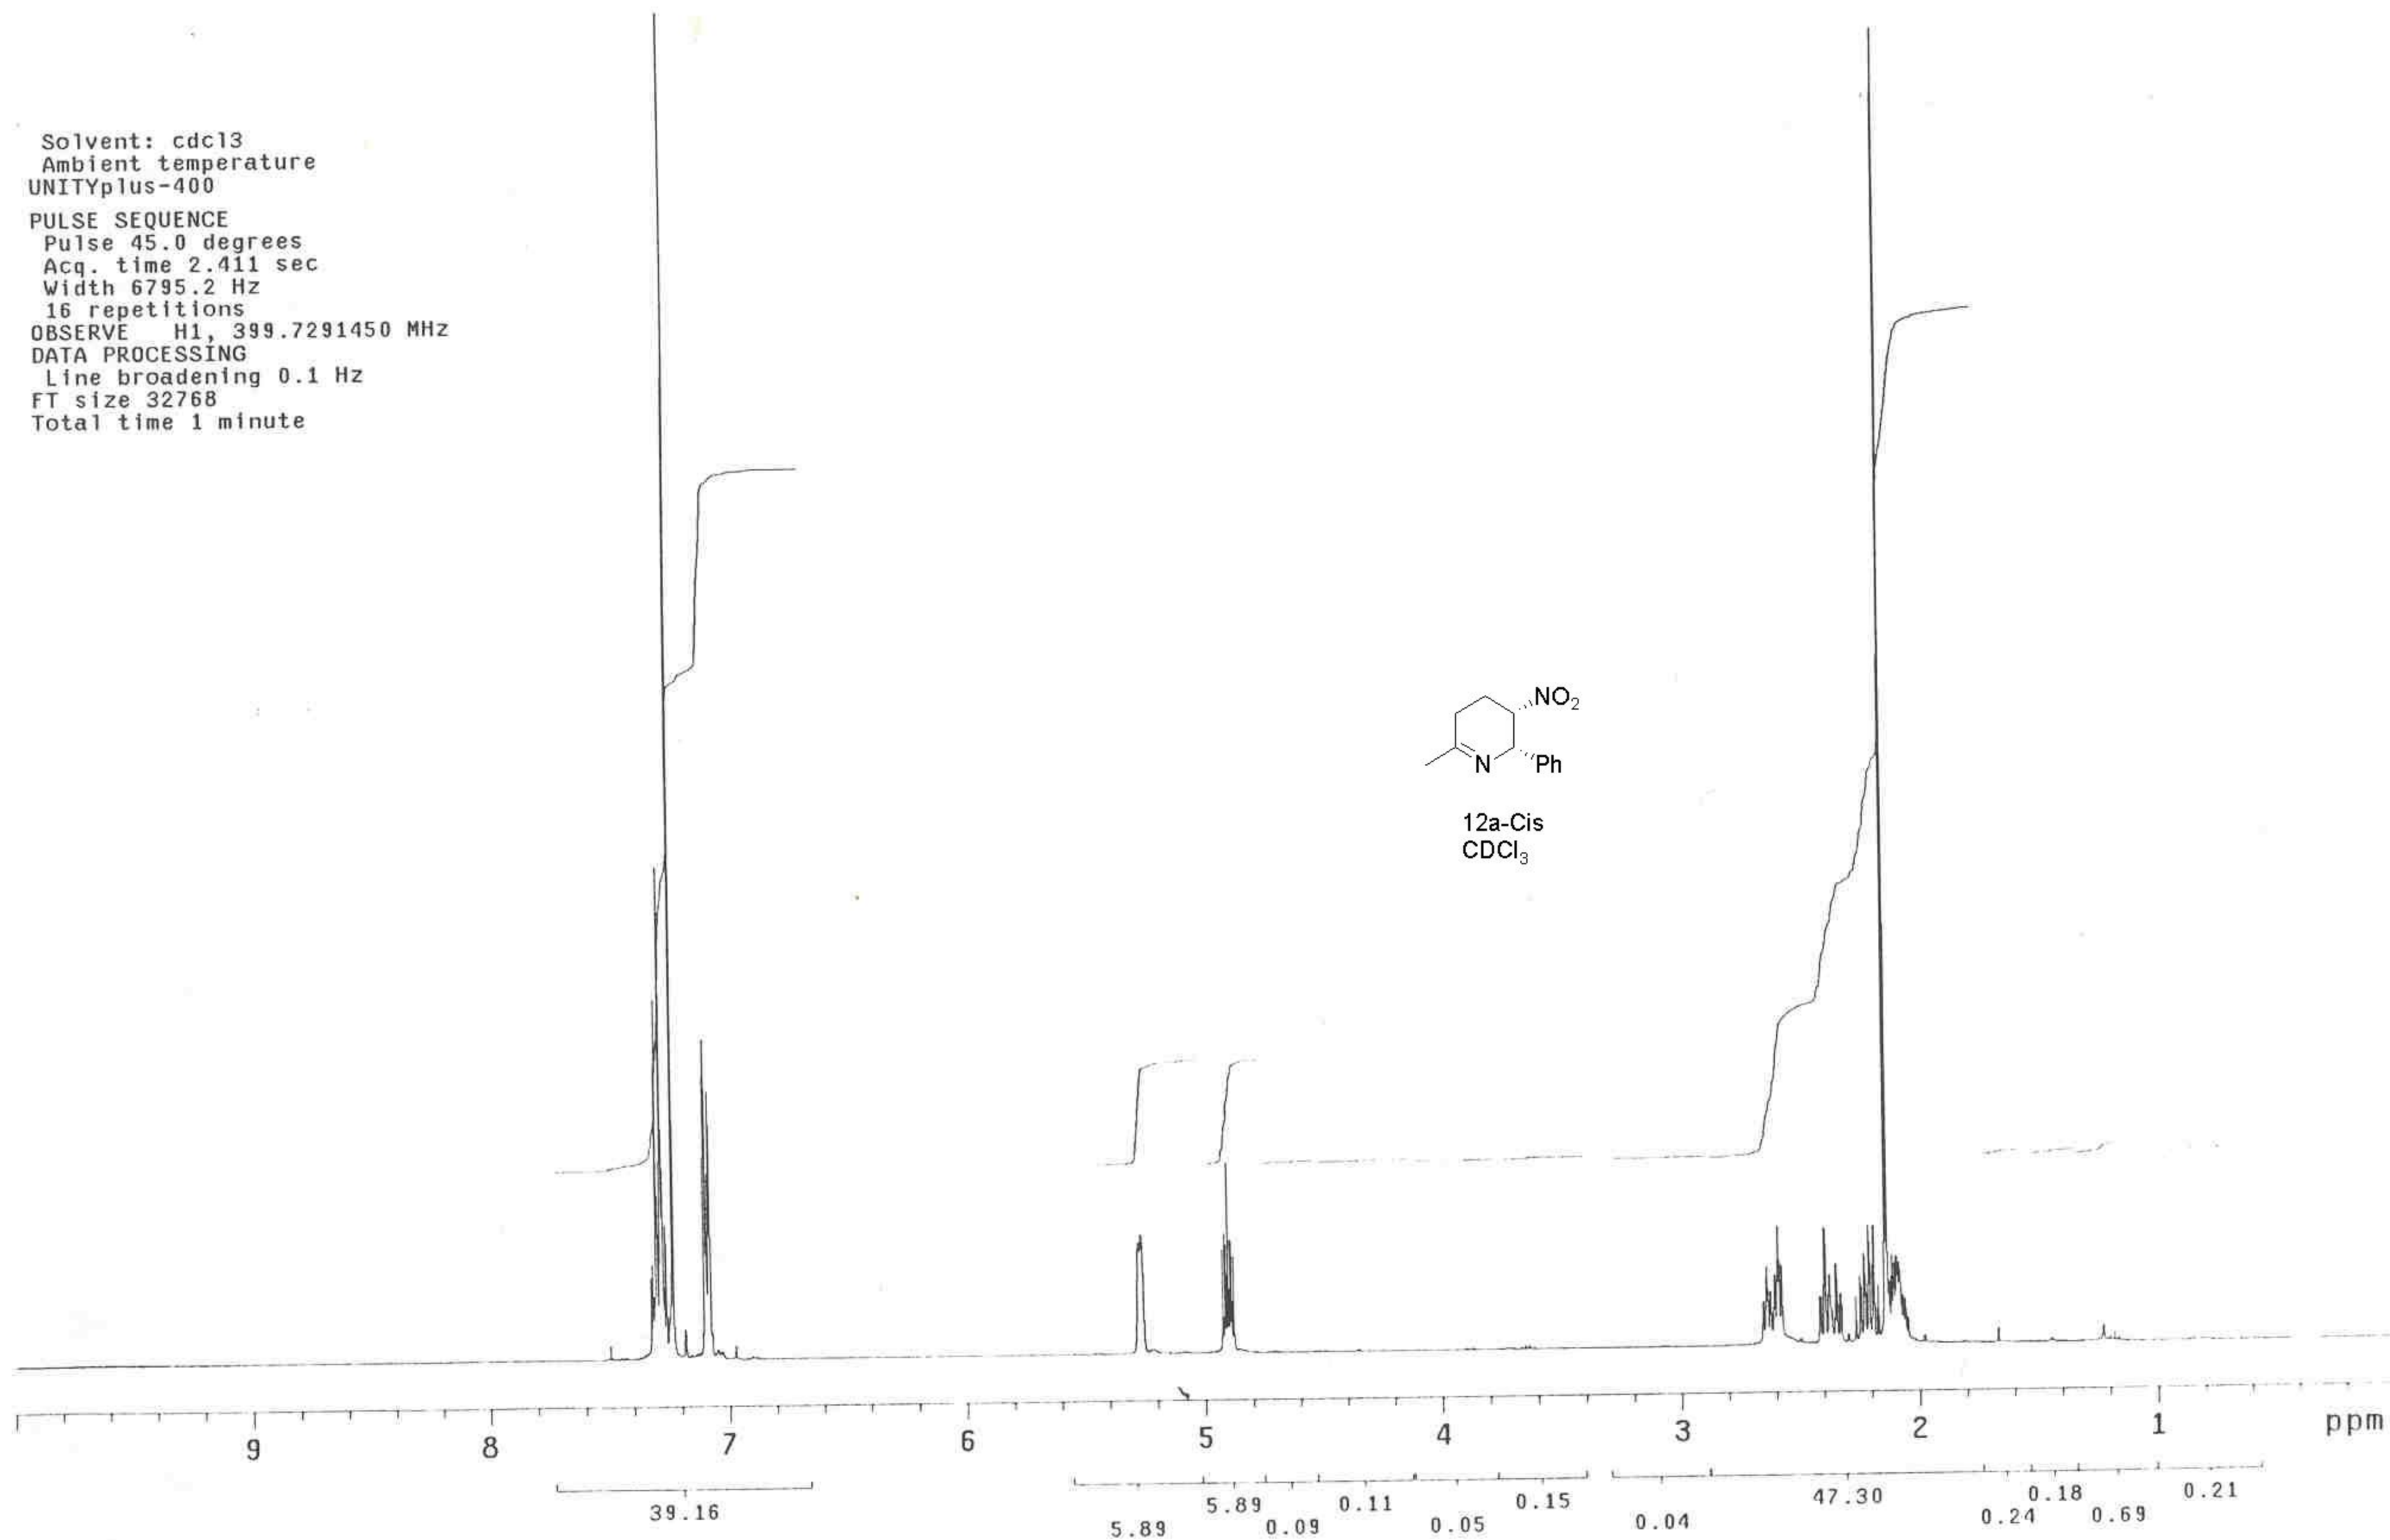

Solvent: cdcl3  
 Ambient temperature  
 UNITYplus-400  
 PULSE SEQUENCE  
 Pulse 45.0 degrees  
 Acq. time 2.412 sec  
 Width 6794.1 Hz  
 16 repetitions  
 OBSERVE H1, 399.655328 MHz  
 DATA PROCESSING  
 Line broadening 0.1 Hz  
 FT size 32768  
 Total time 1 minute

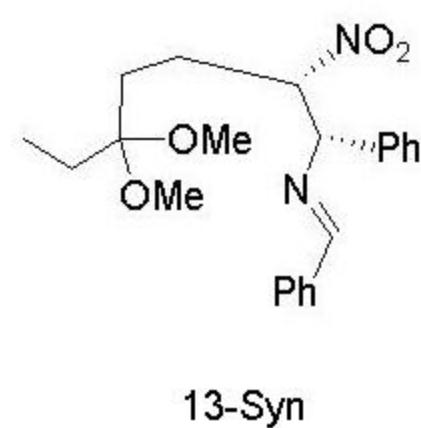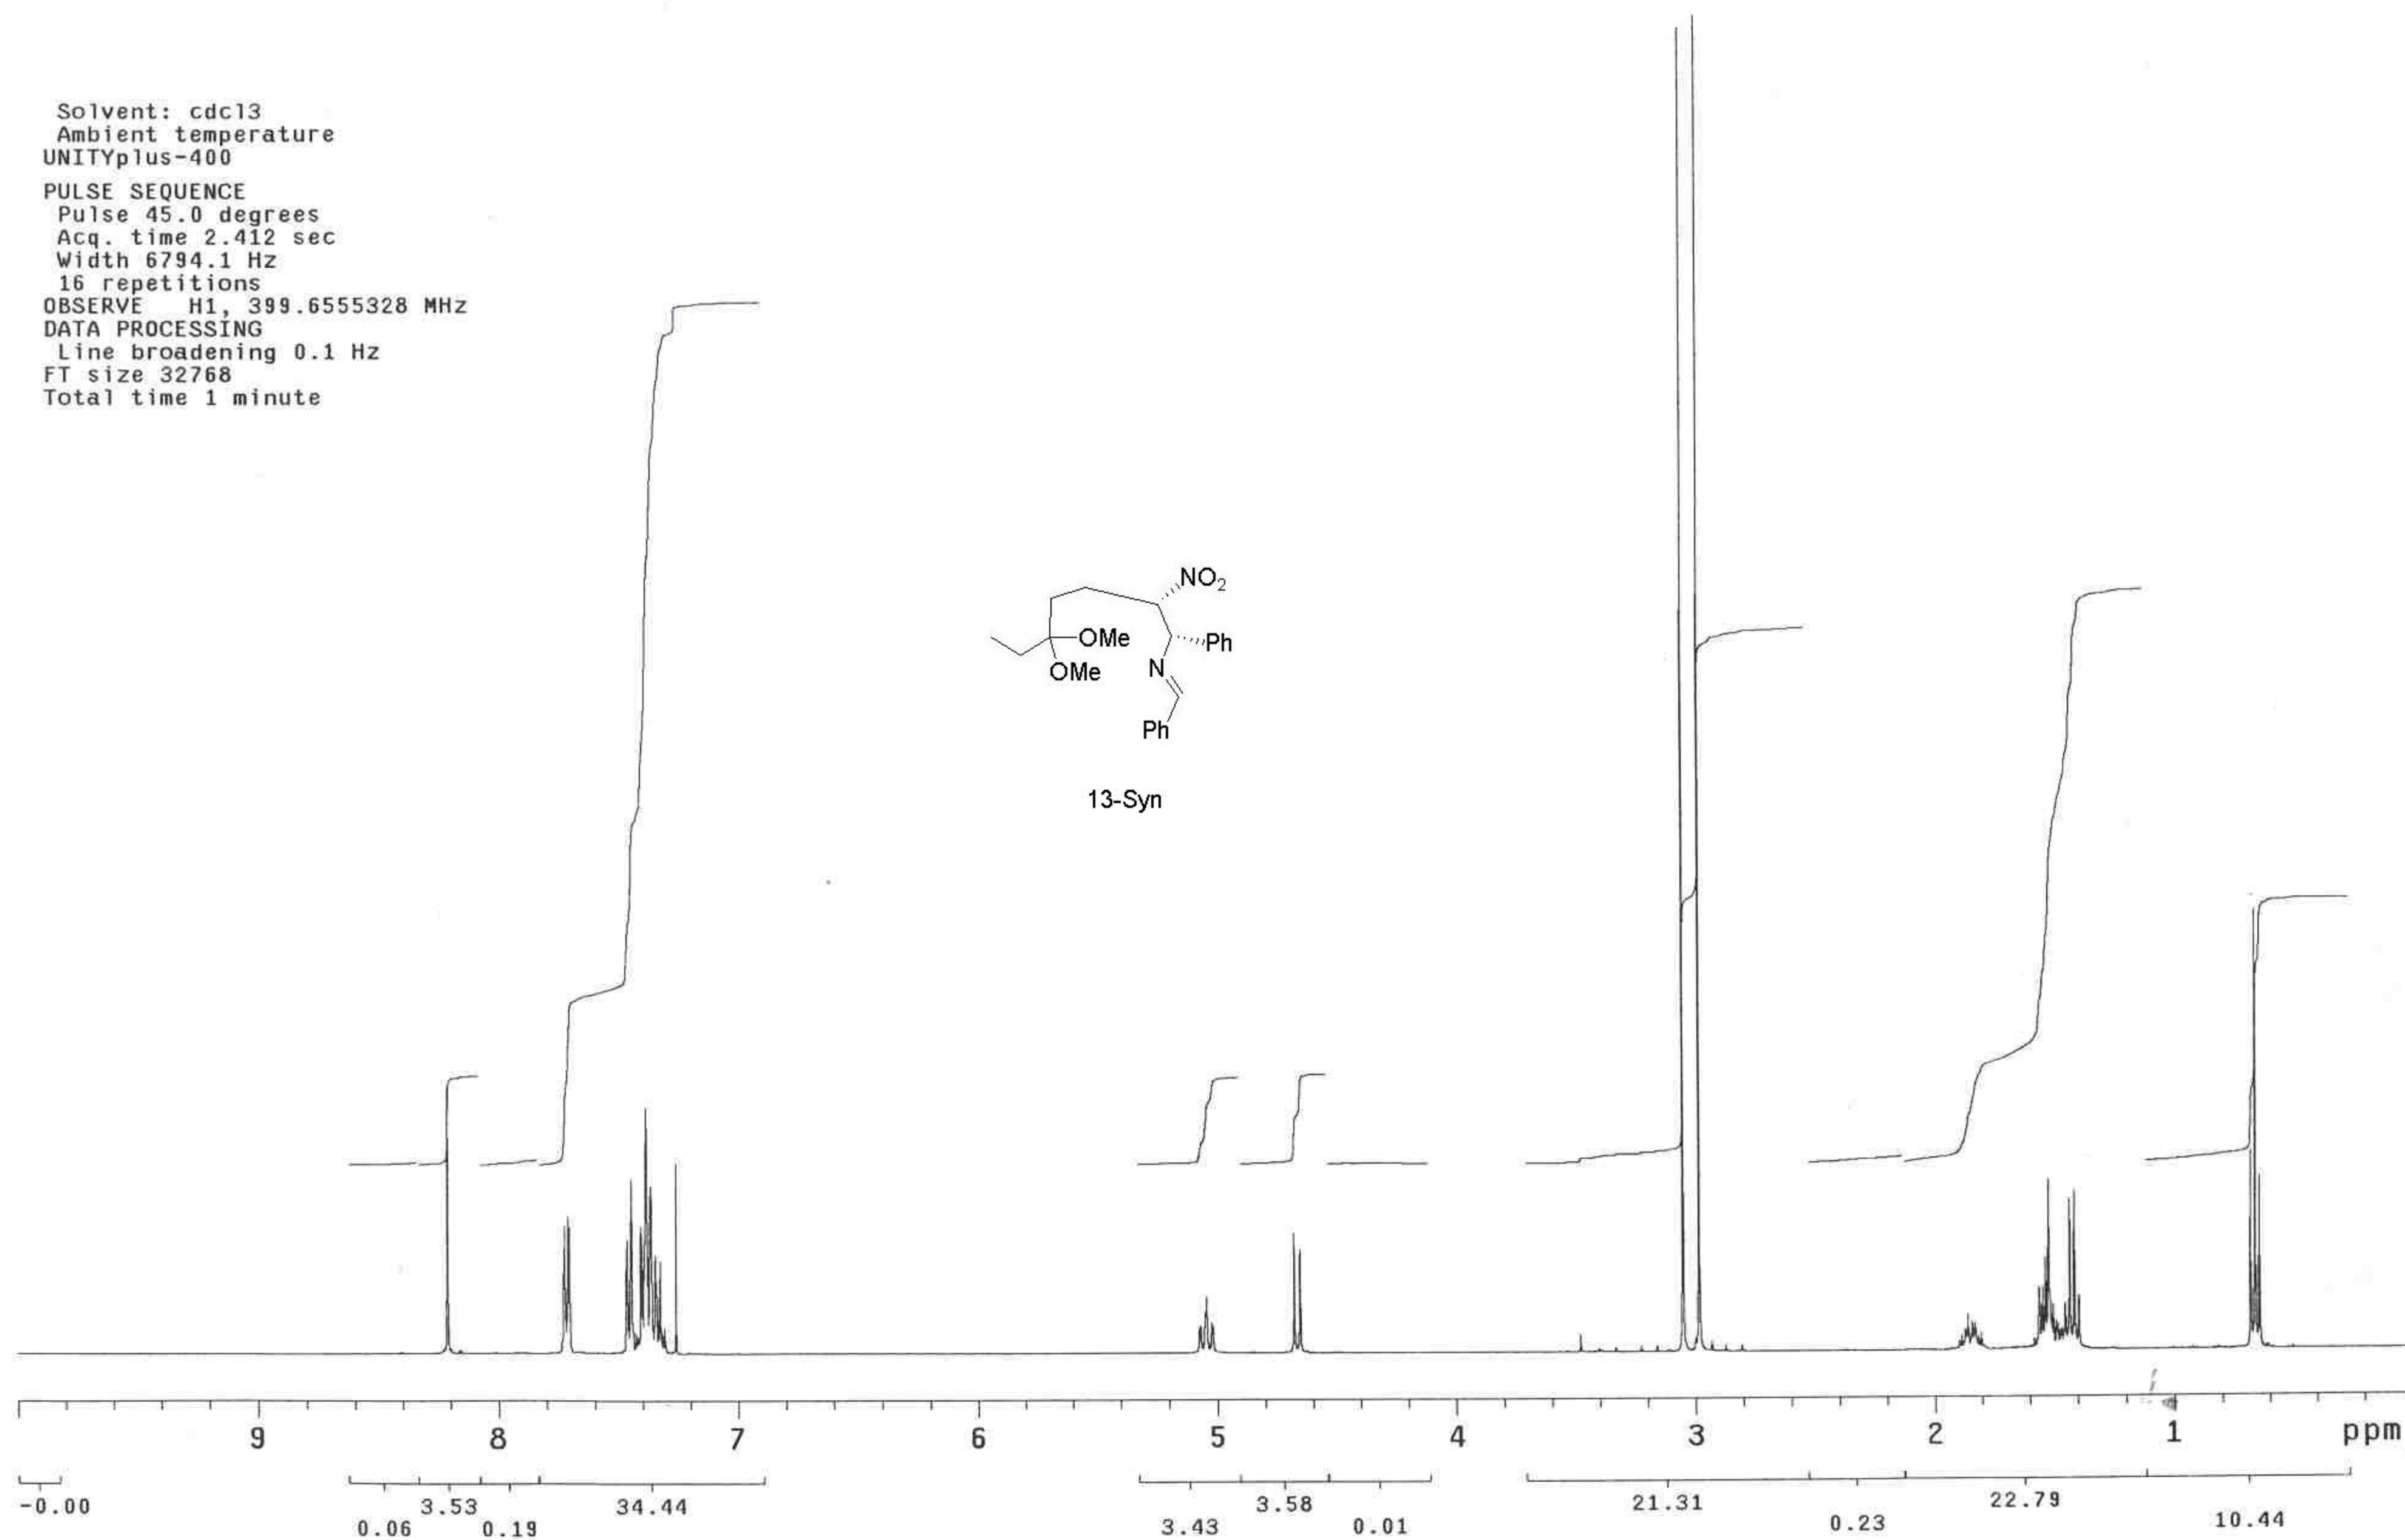

Solvent: cdcl3  
 Ambient temperature  
 UNITYplus-400  
 PULSE SEQUENCE  
 Pulse 45.0 degrees  
 Acq. time 2.412 sec  
 Width 6794.1 Hz  
 16 repetitions  
 OBSERVE H1, 399.6555328 MHz  
 DATA PROCESSING  
 Line broadening 0.1 Hz  
 FT size 32768  
 Total time 1 minute

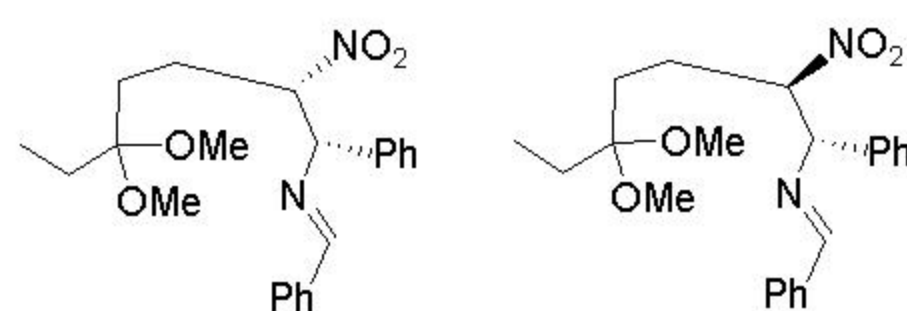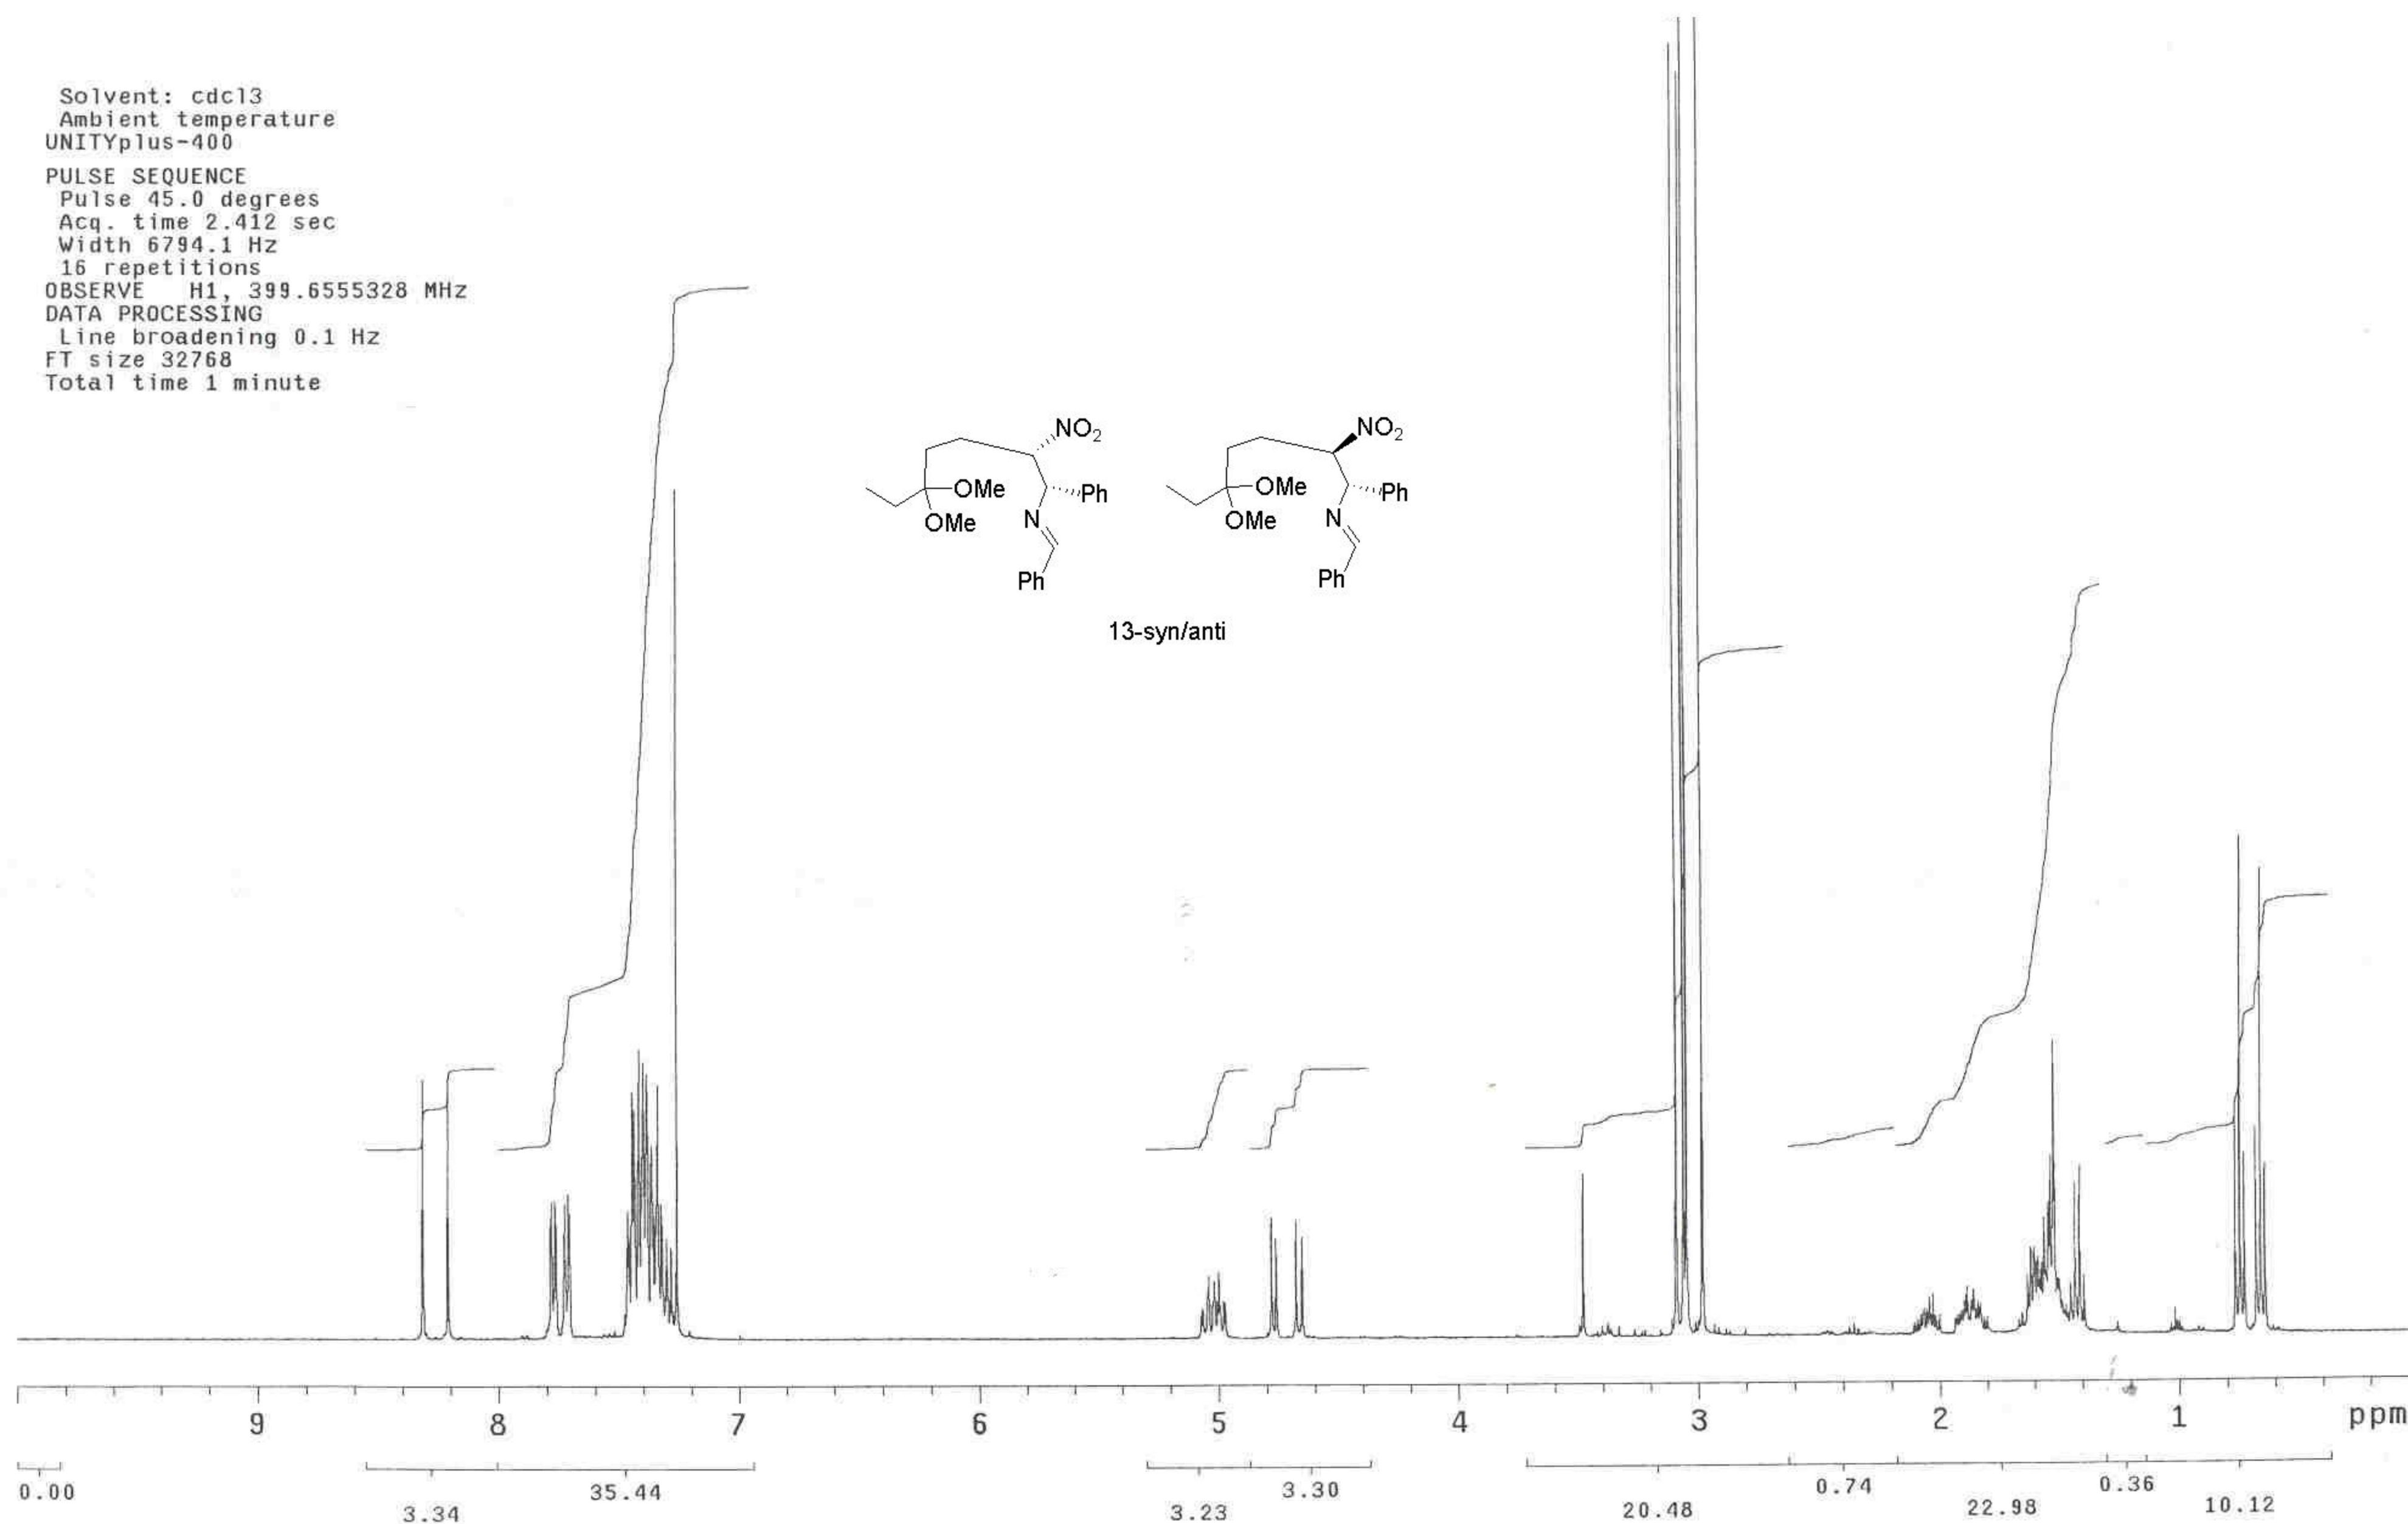



Solvent: cdcl3  
 Ambient temperature  
 UNITYplus-400  
 PULSE SEQUENCE  
 Pulse 45.0 degrees  
 Acq. time 2.411 sec  
 Width 6795.2 Hz  
 16 repetitions  
 OBSERVE H1, 399.7291450 MHz  
 DATA PROCESSING  
 Line broadening 0.1 Hz  
 FT size 32768  
 Total time 1 minute

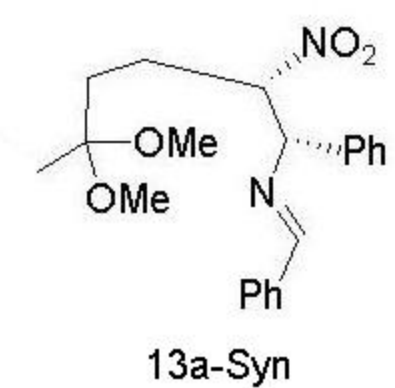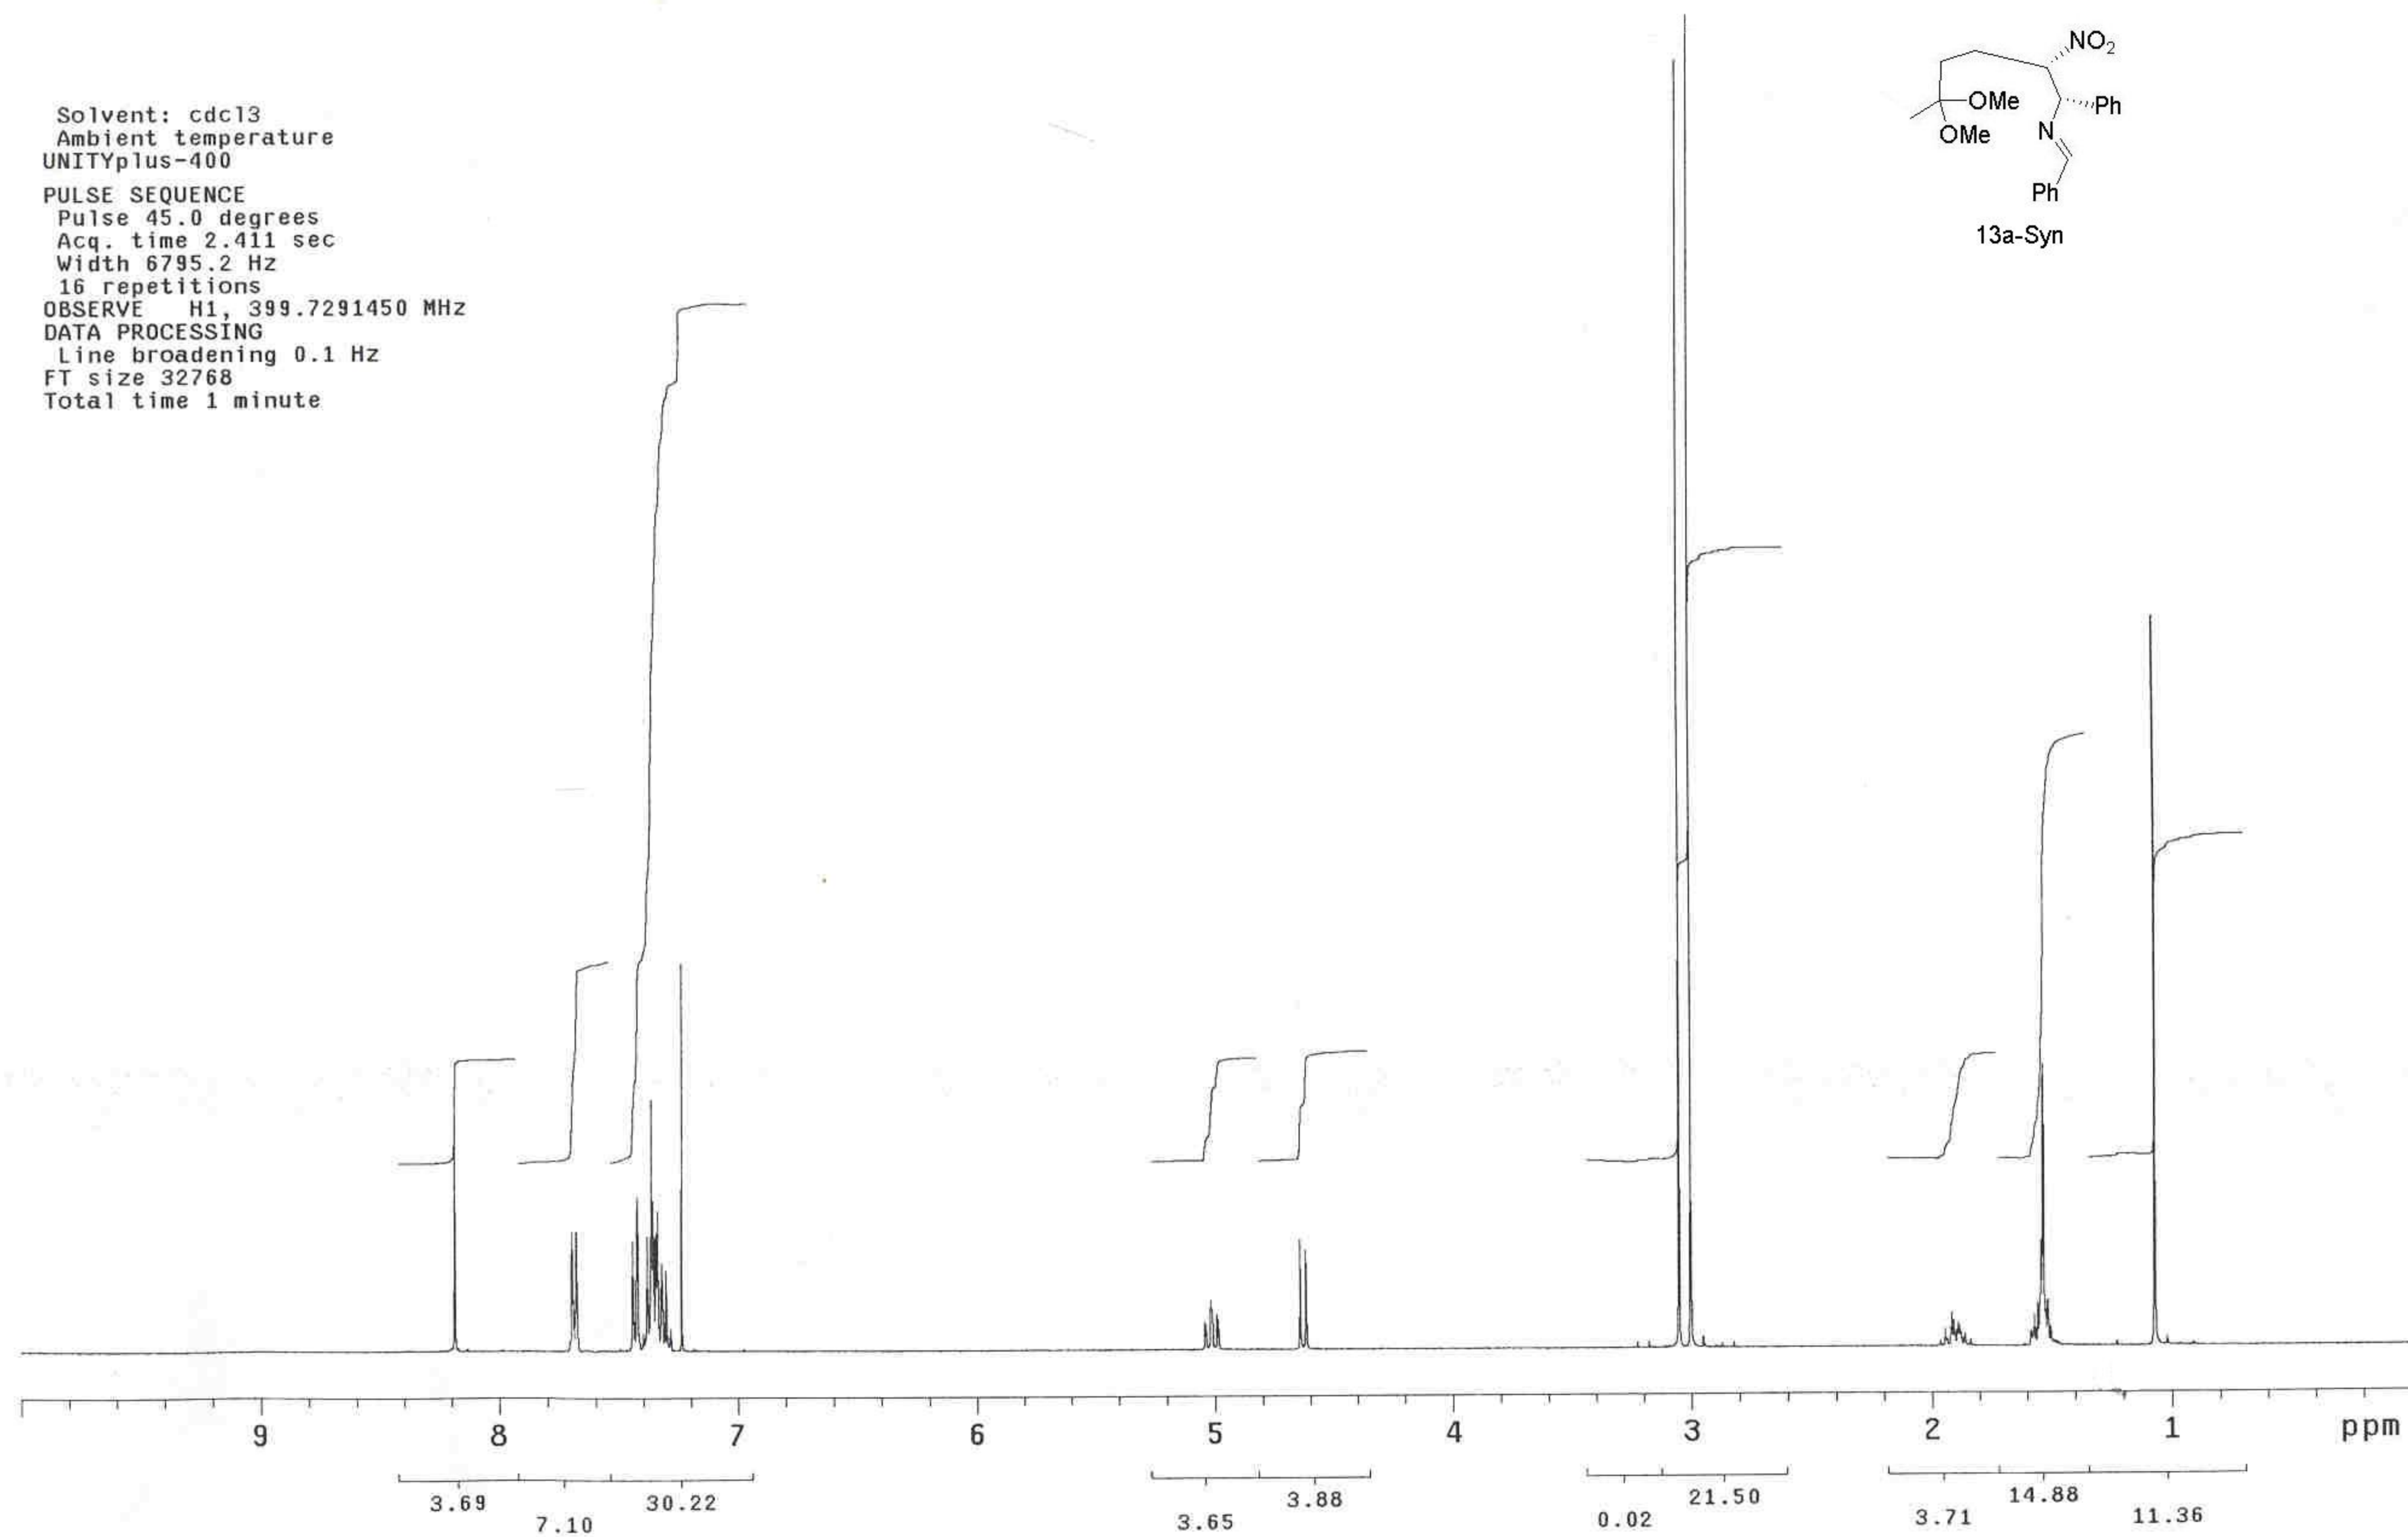

Solvent: cdc13  
Ambient temperature  
UNITYplus-400  
PULSE SEQUENCE  
Pulse 45.0 degrees  
Acq. time 2.412 sec  
Width 6794.1 Hz  
16 repetitions  
OBSERVE H1, 399.6555328 MHz  
DATA PROCESSING  
Line broadening 0.1 Hz  
FT size 32768  
Total time 1 minute

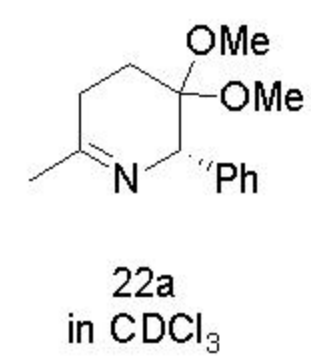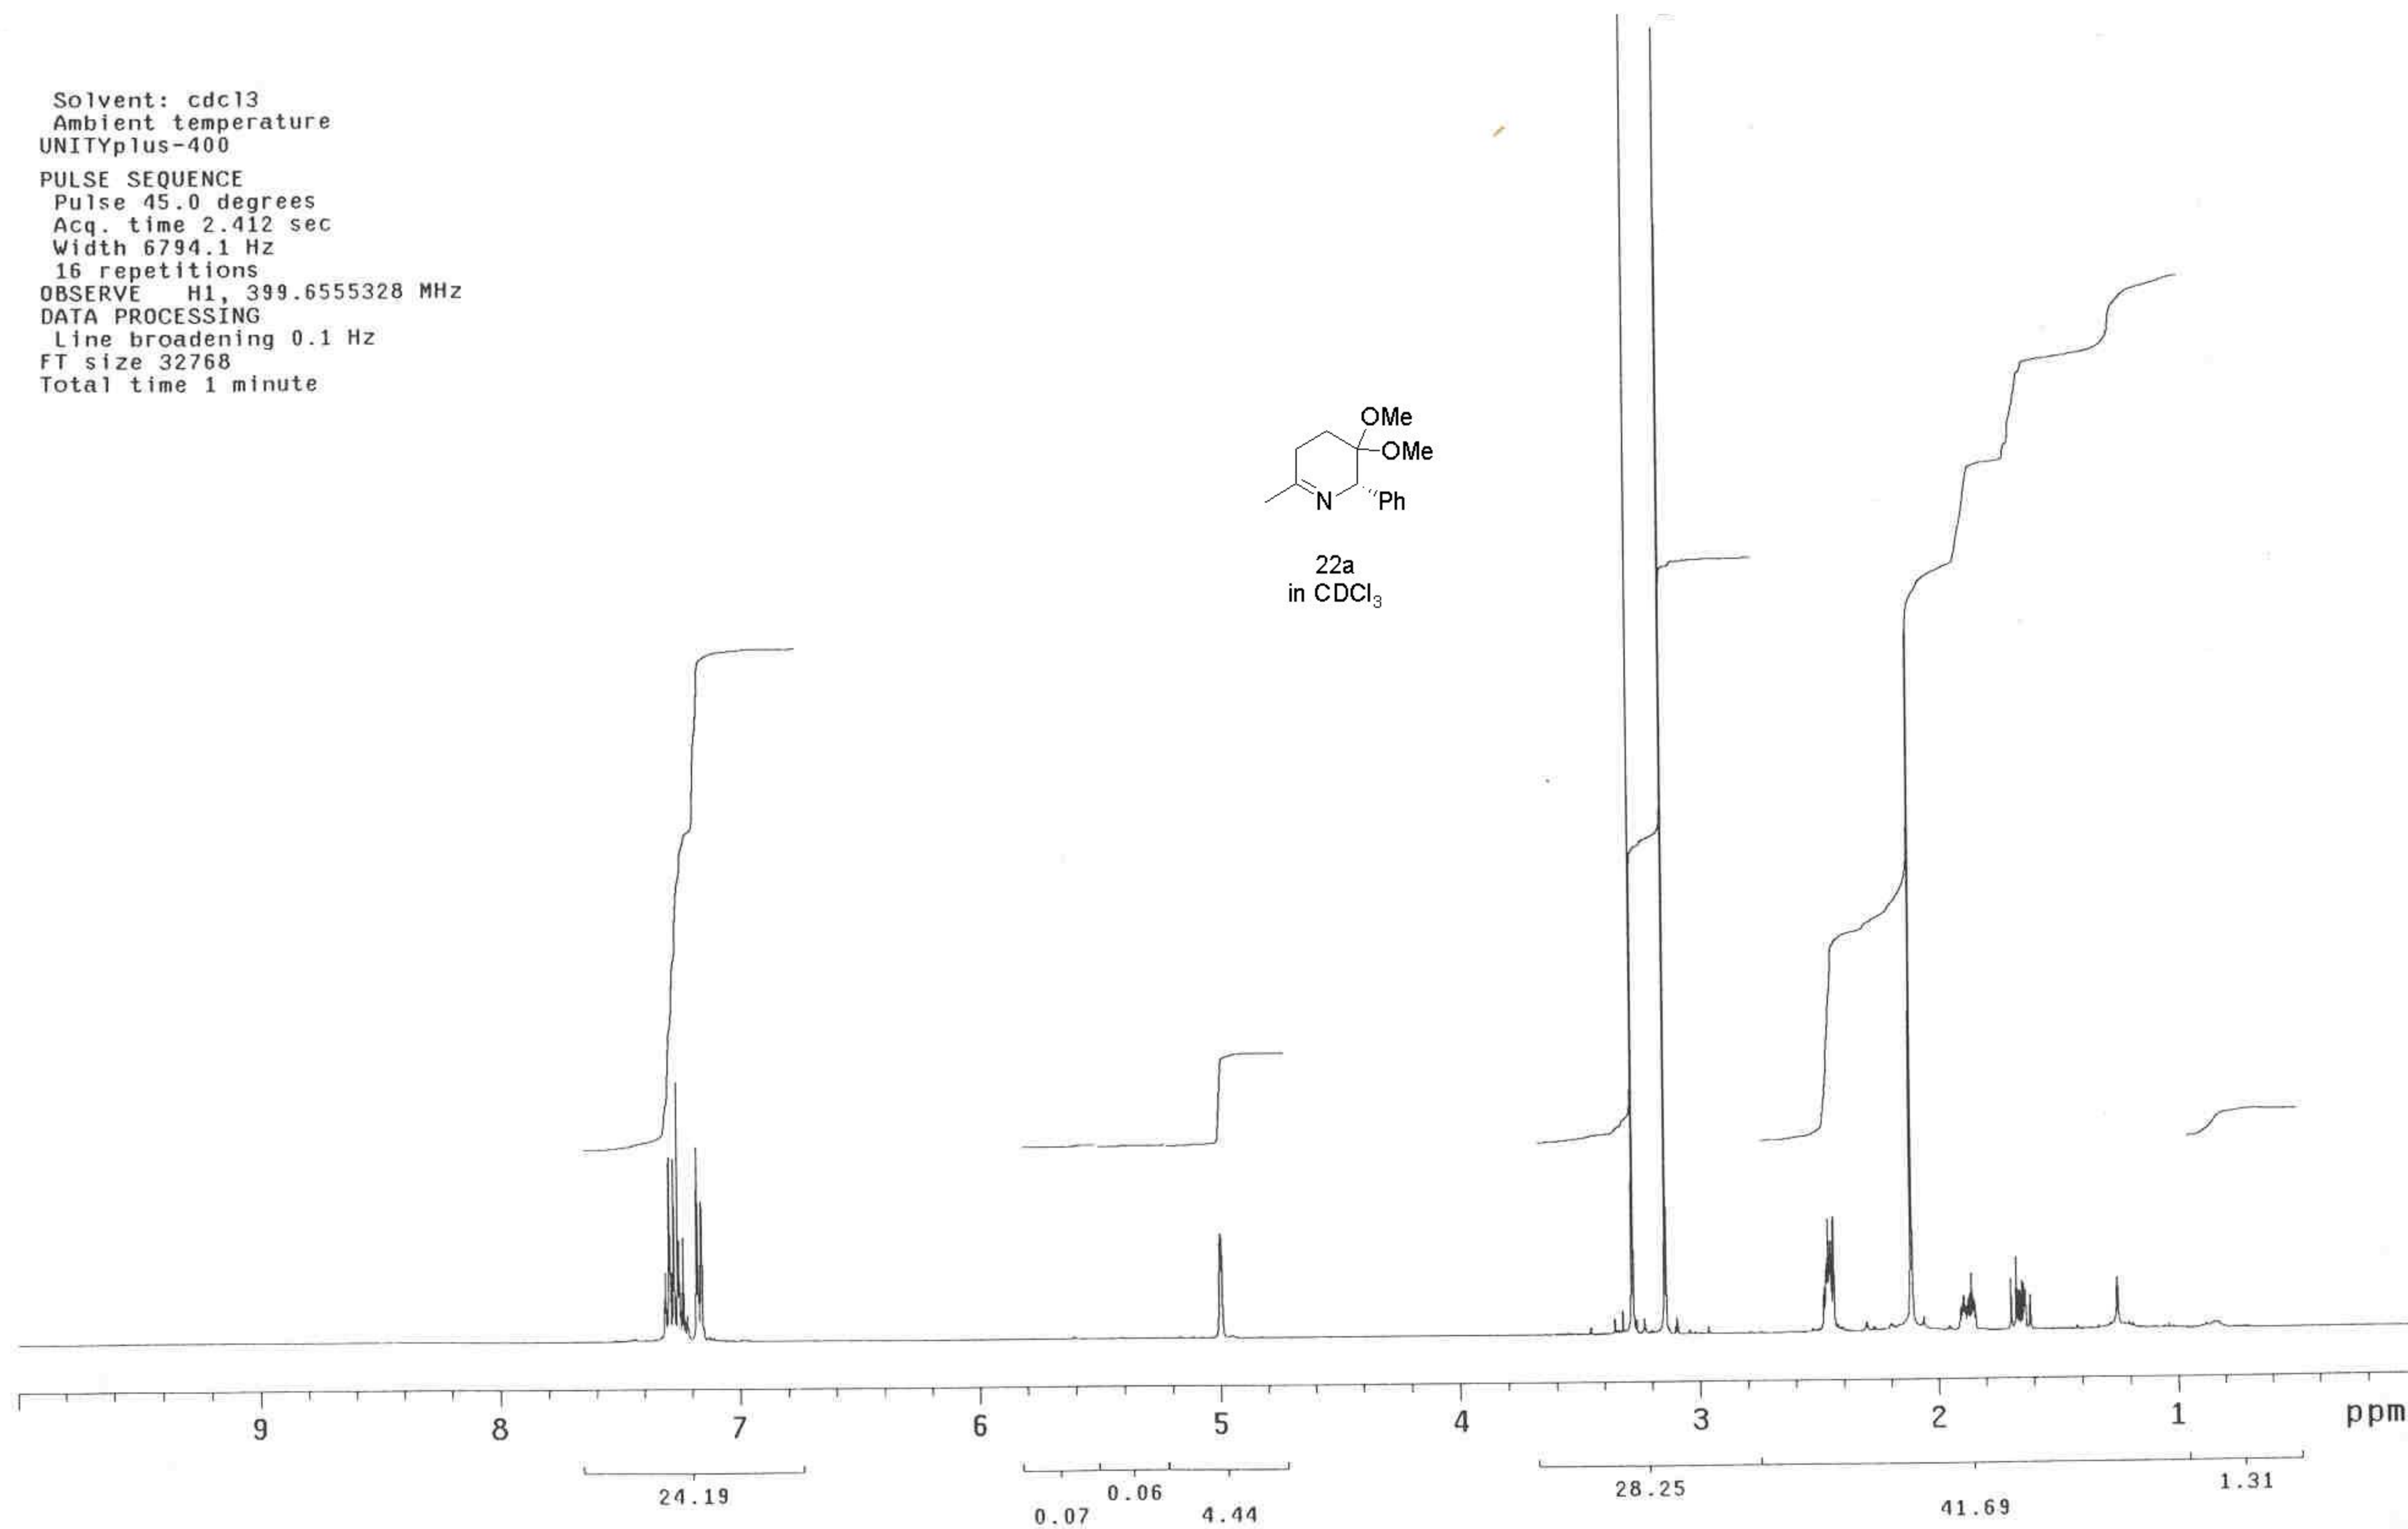

Solvent: cdcl3  
Ambient temperature  
Sample #13  
File: 1302  
UNITYplus-300  
PULSE SEQUENCE  
Pulse 45.0 degrees  
Acq. time 3.215 sec  
Width 5096.5 Hz  
32 repetitions  
OBSERVE H1, 299.7983245 MHz  
DATA PROCESSING  
Line broadening 0.1 Hz  
FT size 32768  
Total time 1 minutes

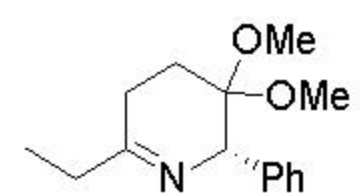

22  
Camphorsulfonate salt  
in CDCl<sub>3</sub>

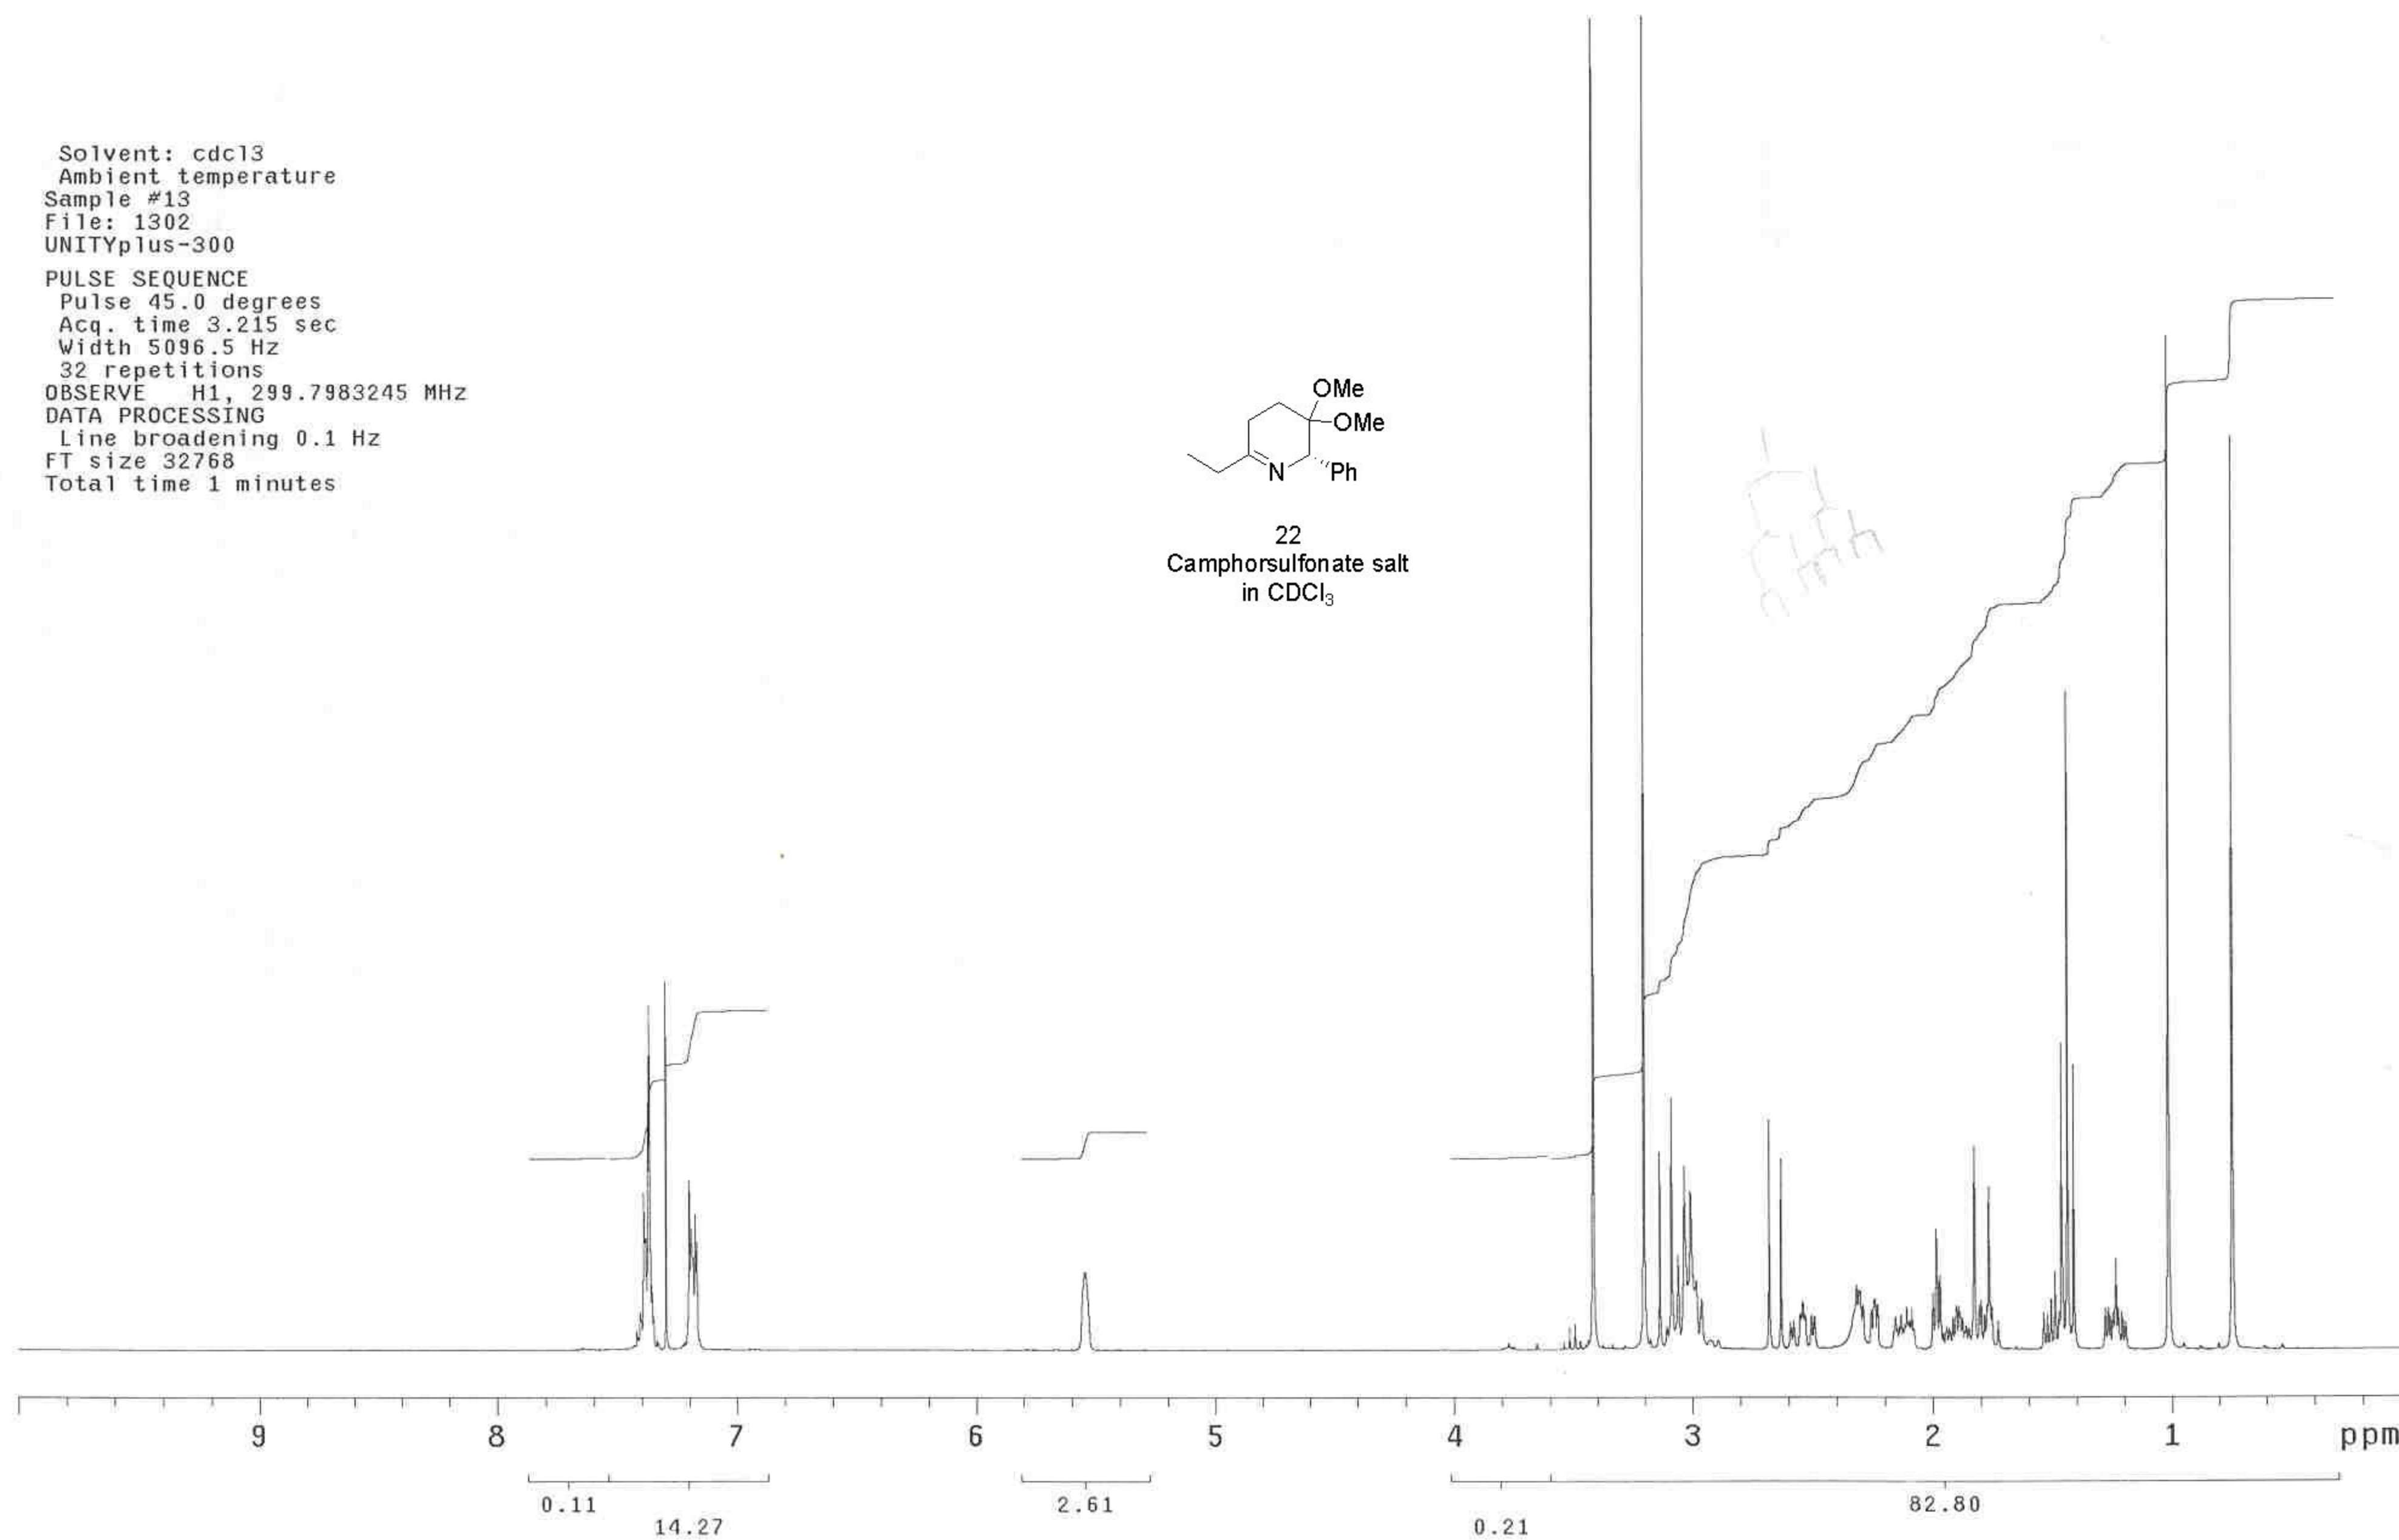

Solvent: d2o  
 Ambient temperature  
 Sample #13  
 File: 1301  
 UNITYplus-300  
 PULSE SEQUENCE  
 Pulse 45.0 degrees  
 Acq. time 3.215 sec  
 Width 5096.5 Hz  
 32 repetitions  
 OBSERVE H1, 299.7990949 MHz  
 DATA PROCESSING  
 Line broadening 0.1 Hz  
 FT size 32768  
 Total time 1 minutes

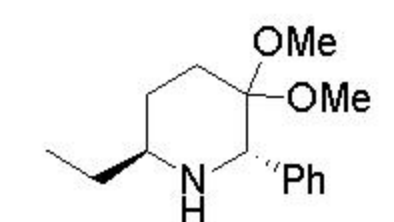

23  
 Tosylate salt in D2O

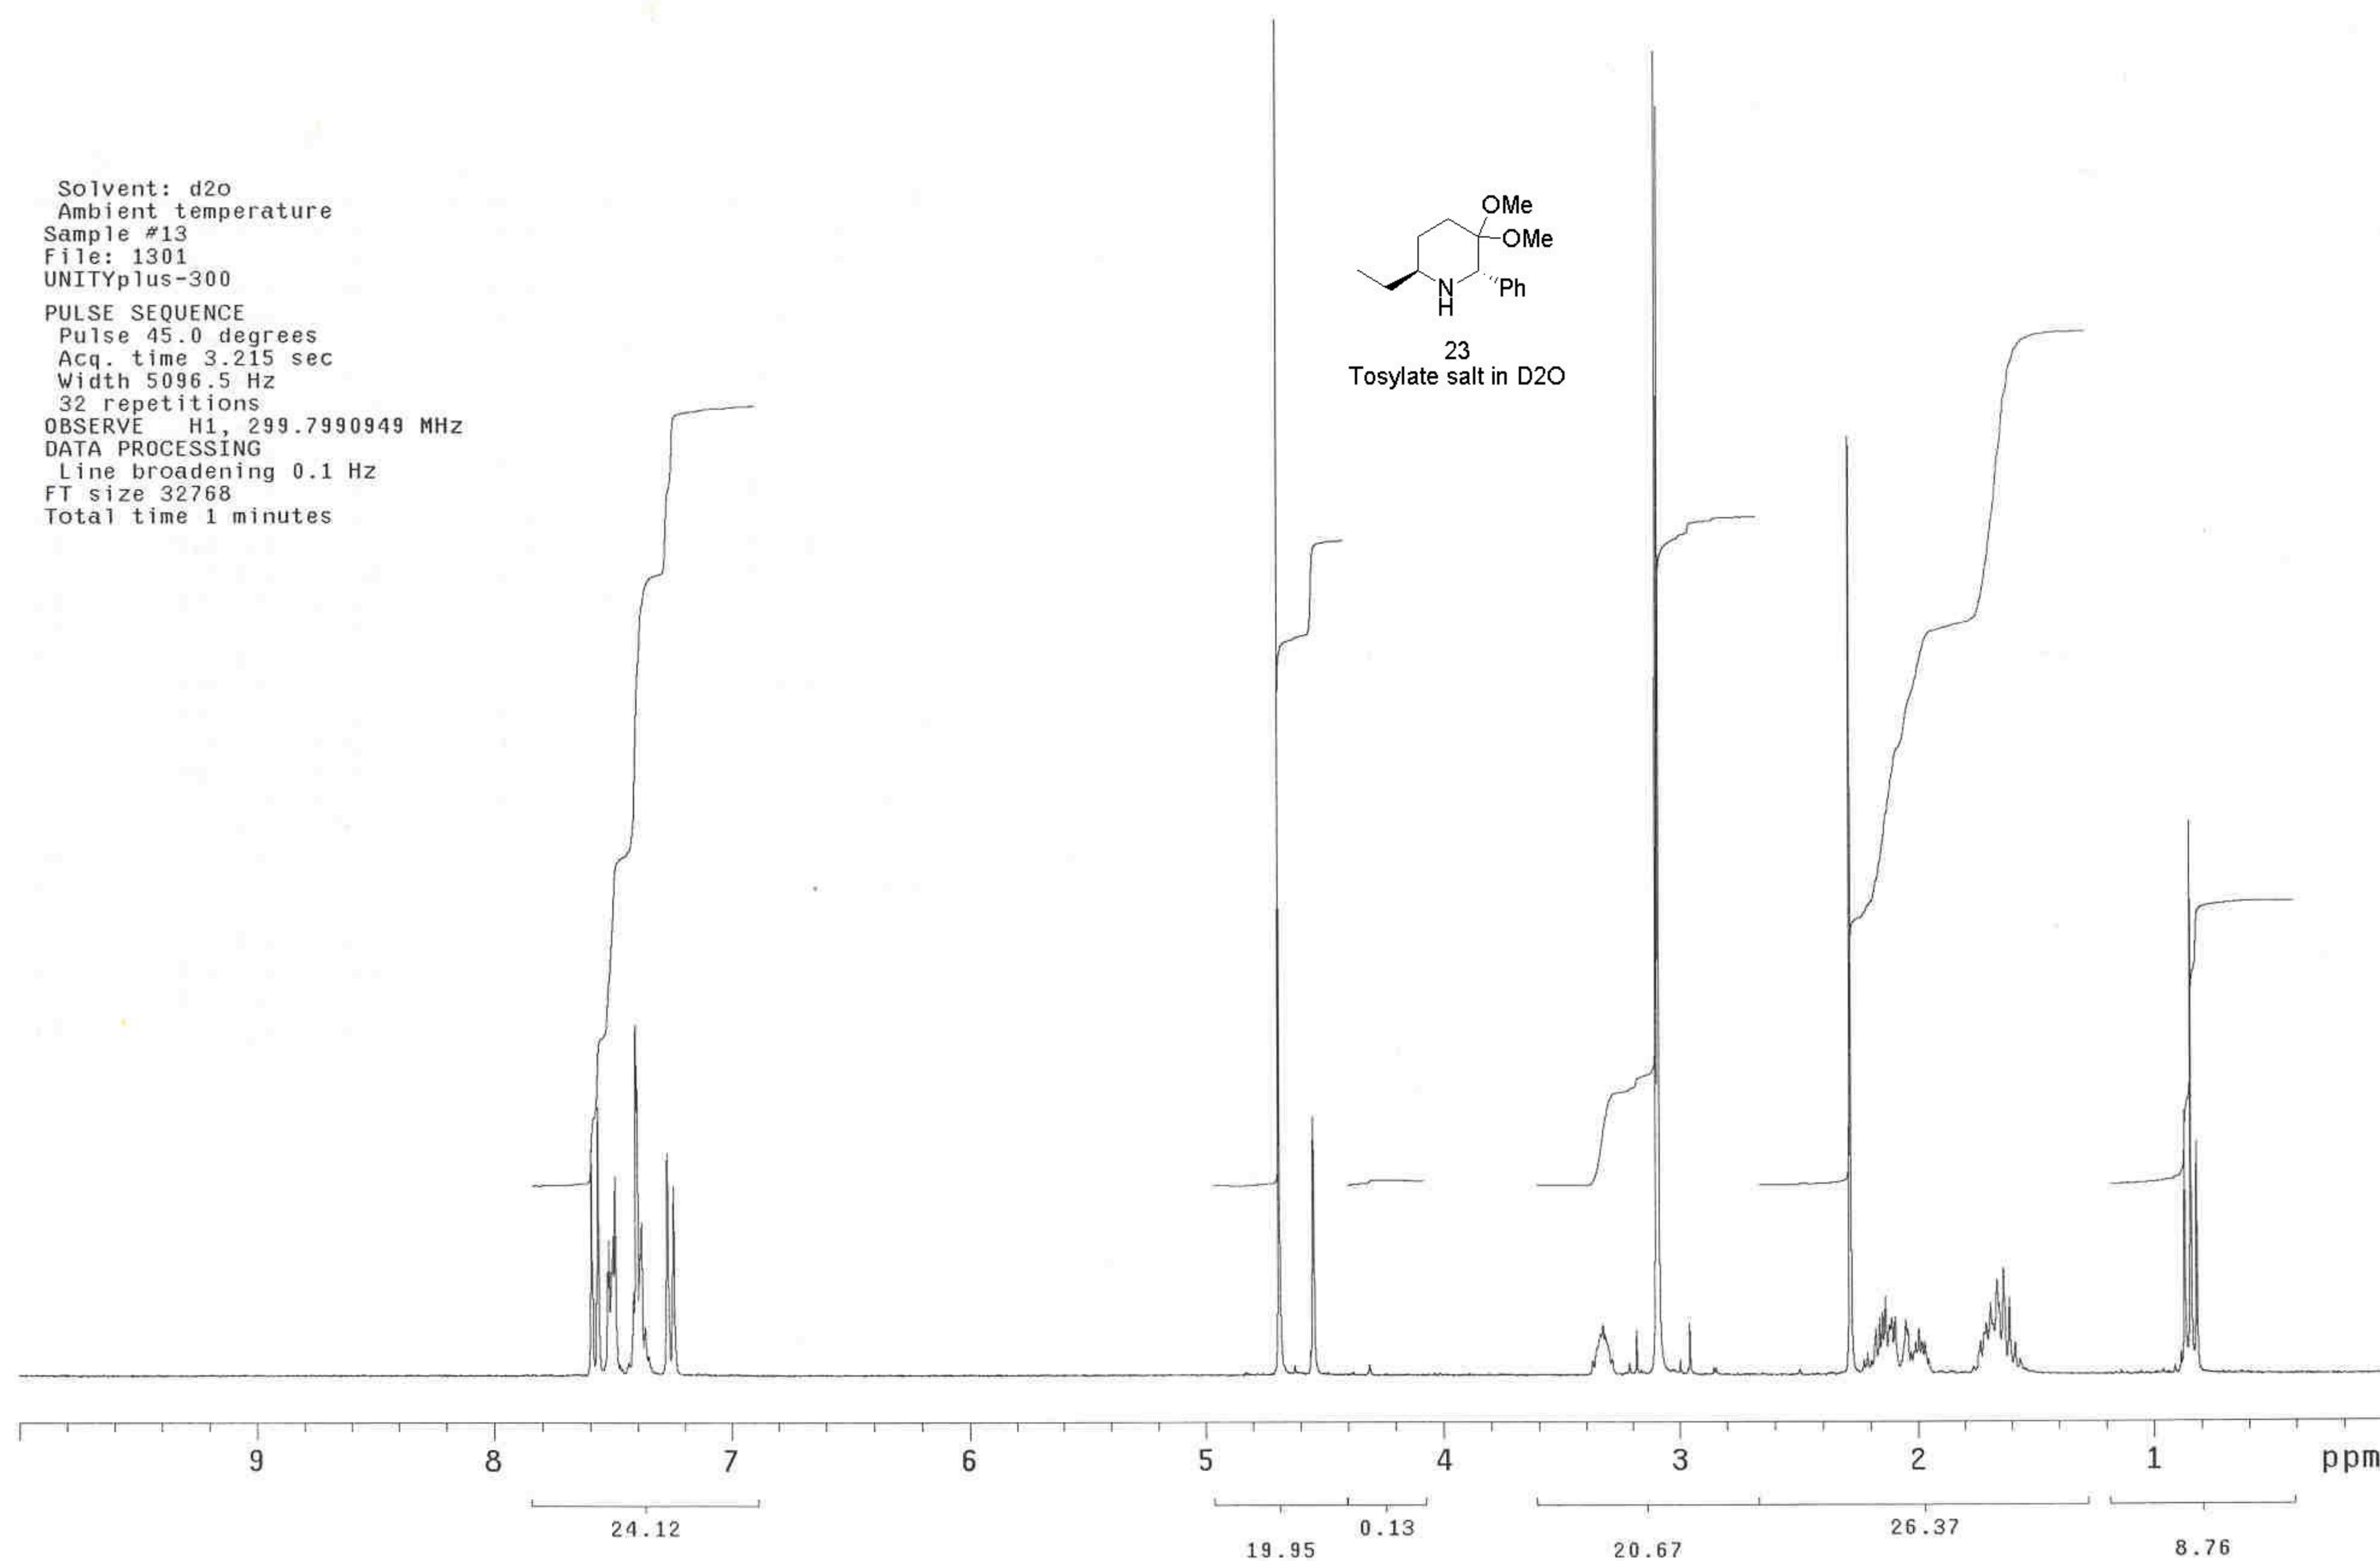



Solvent: cdcl3  
 Ambient temperature  
 UNITYplus-400  
 PULSE SEQUENCE  
 Pulse 45.0 degrees  
 Acq. time 2.411 sec  
 Width 6795.2 Hz  
 16 repetitions  
 OBSERVE H1, 399.7291450 MHz  
 DATA PROCESSING  
 Line broadening 0.1 Hz  
 FT size 32768  
 Total time 1 minute

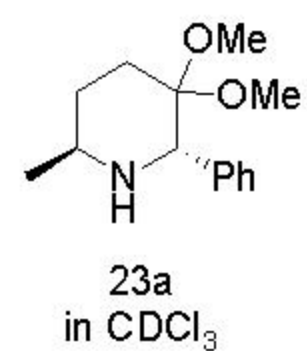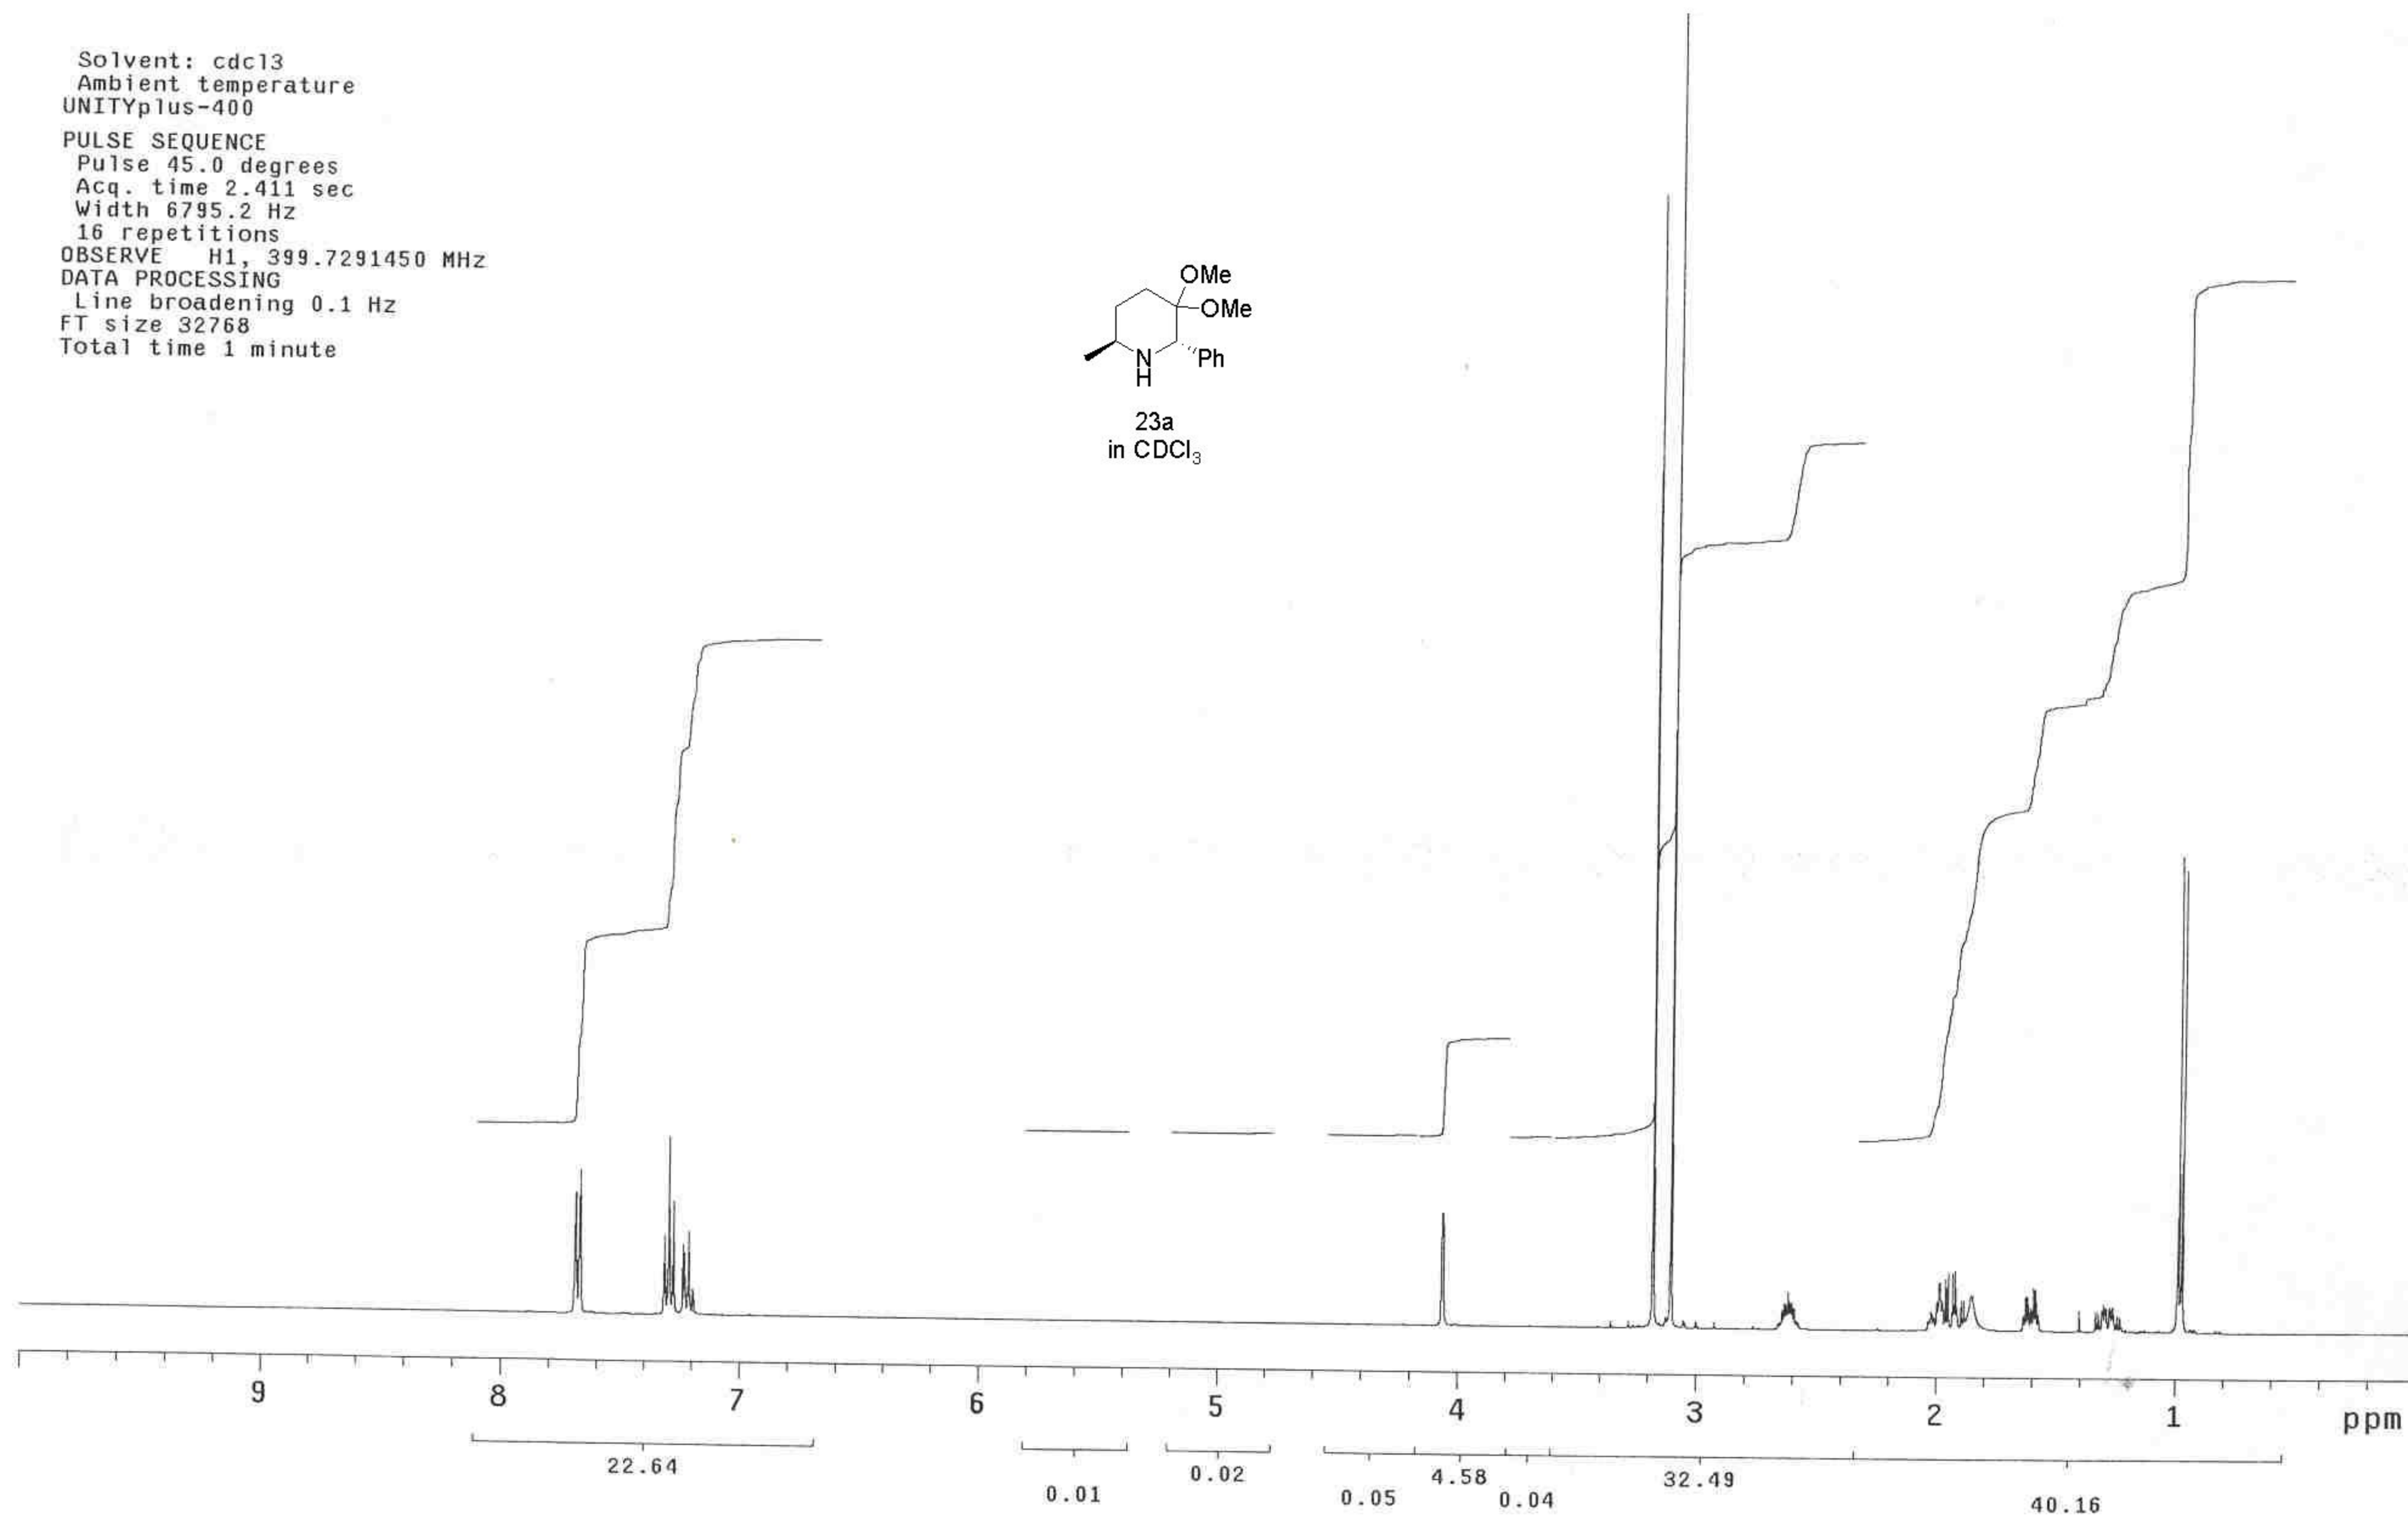

Solvent: d2o  
 Ambient temperature  
 UNITYplus-400  
 PULSE SEQUENCE  
 Pulse 45.0 degrees  
 Acq. time 2.411 sec  
 Width 6795.2 Hz  
 16 repetitions  
 OBSERVE H1, 399.7301723 MHz  
 DATA PROCESSING  
 Line broadening 0.1 Hz  
 FT size 32768  
 Total time 1 minute

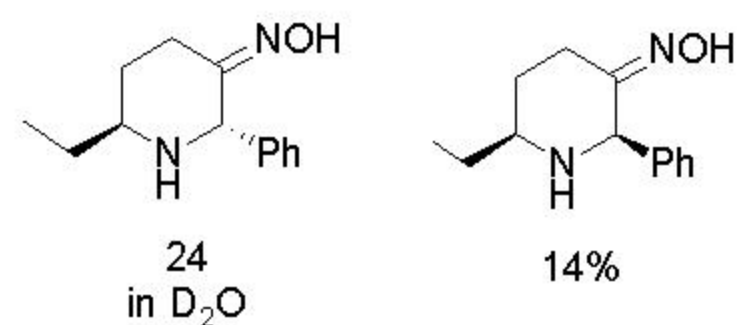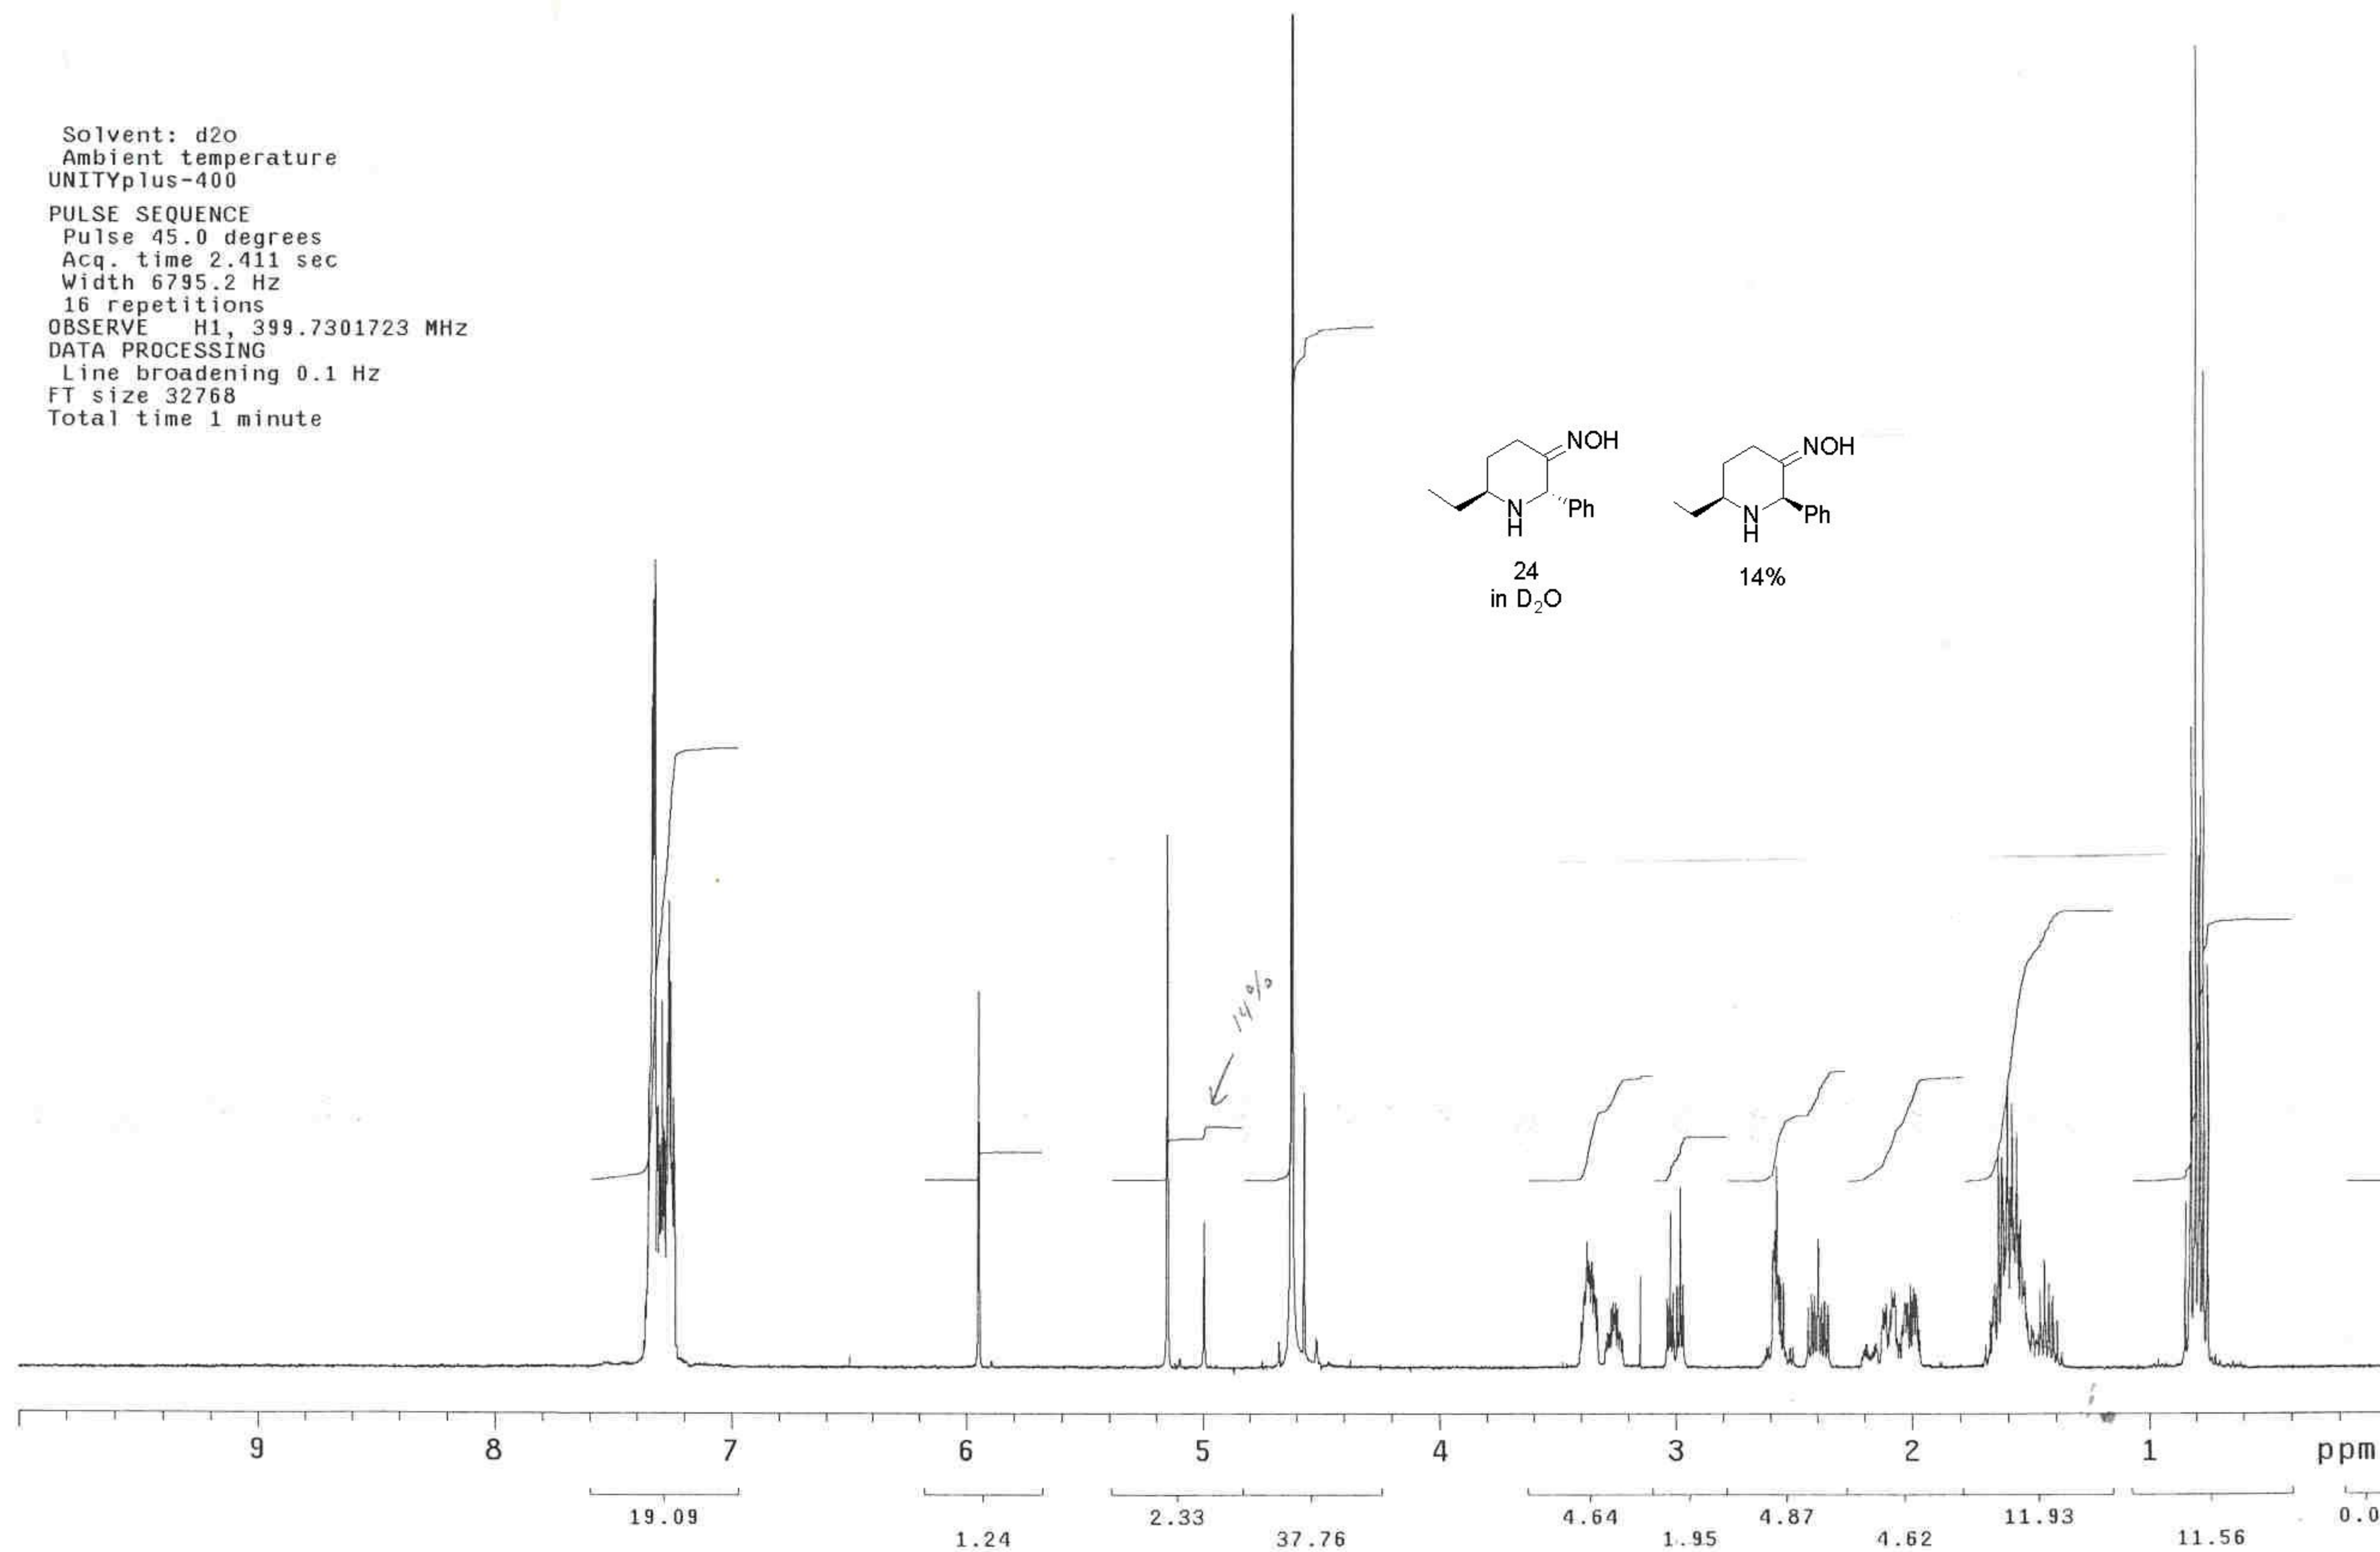

Solvent: d2o  
 Ambient temperature  
 Sample #36  
 File: 3601  
 UNITYplus-400  
 PULSE SEQUENCE  
 Pulse 45.0 degrees  
 Acq. time 2.410 sec  
 Width 6798.1 Hz  
 32 repetitions  
 OBSERVE H1, 399.8924674 MHz  
 DATA PROCESSING  
 Line broadening 0.1 Hz  
 FT size 32768  
 Total time 1 minute

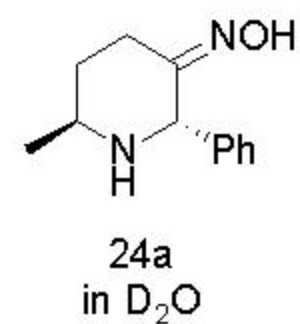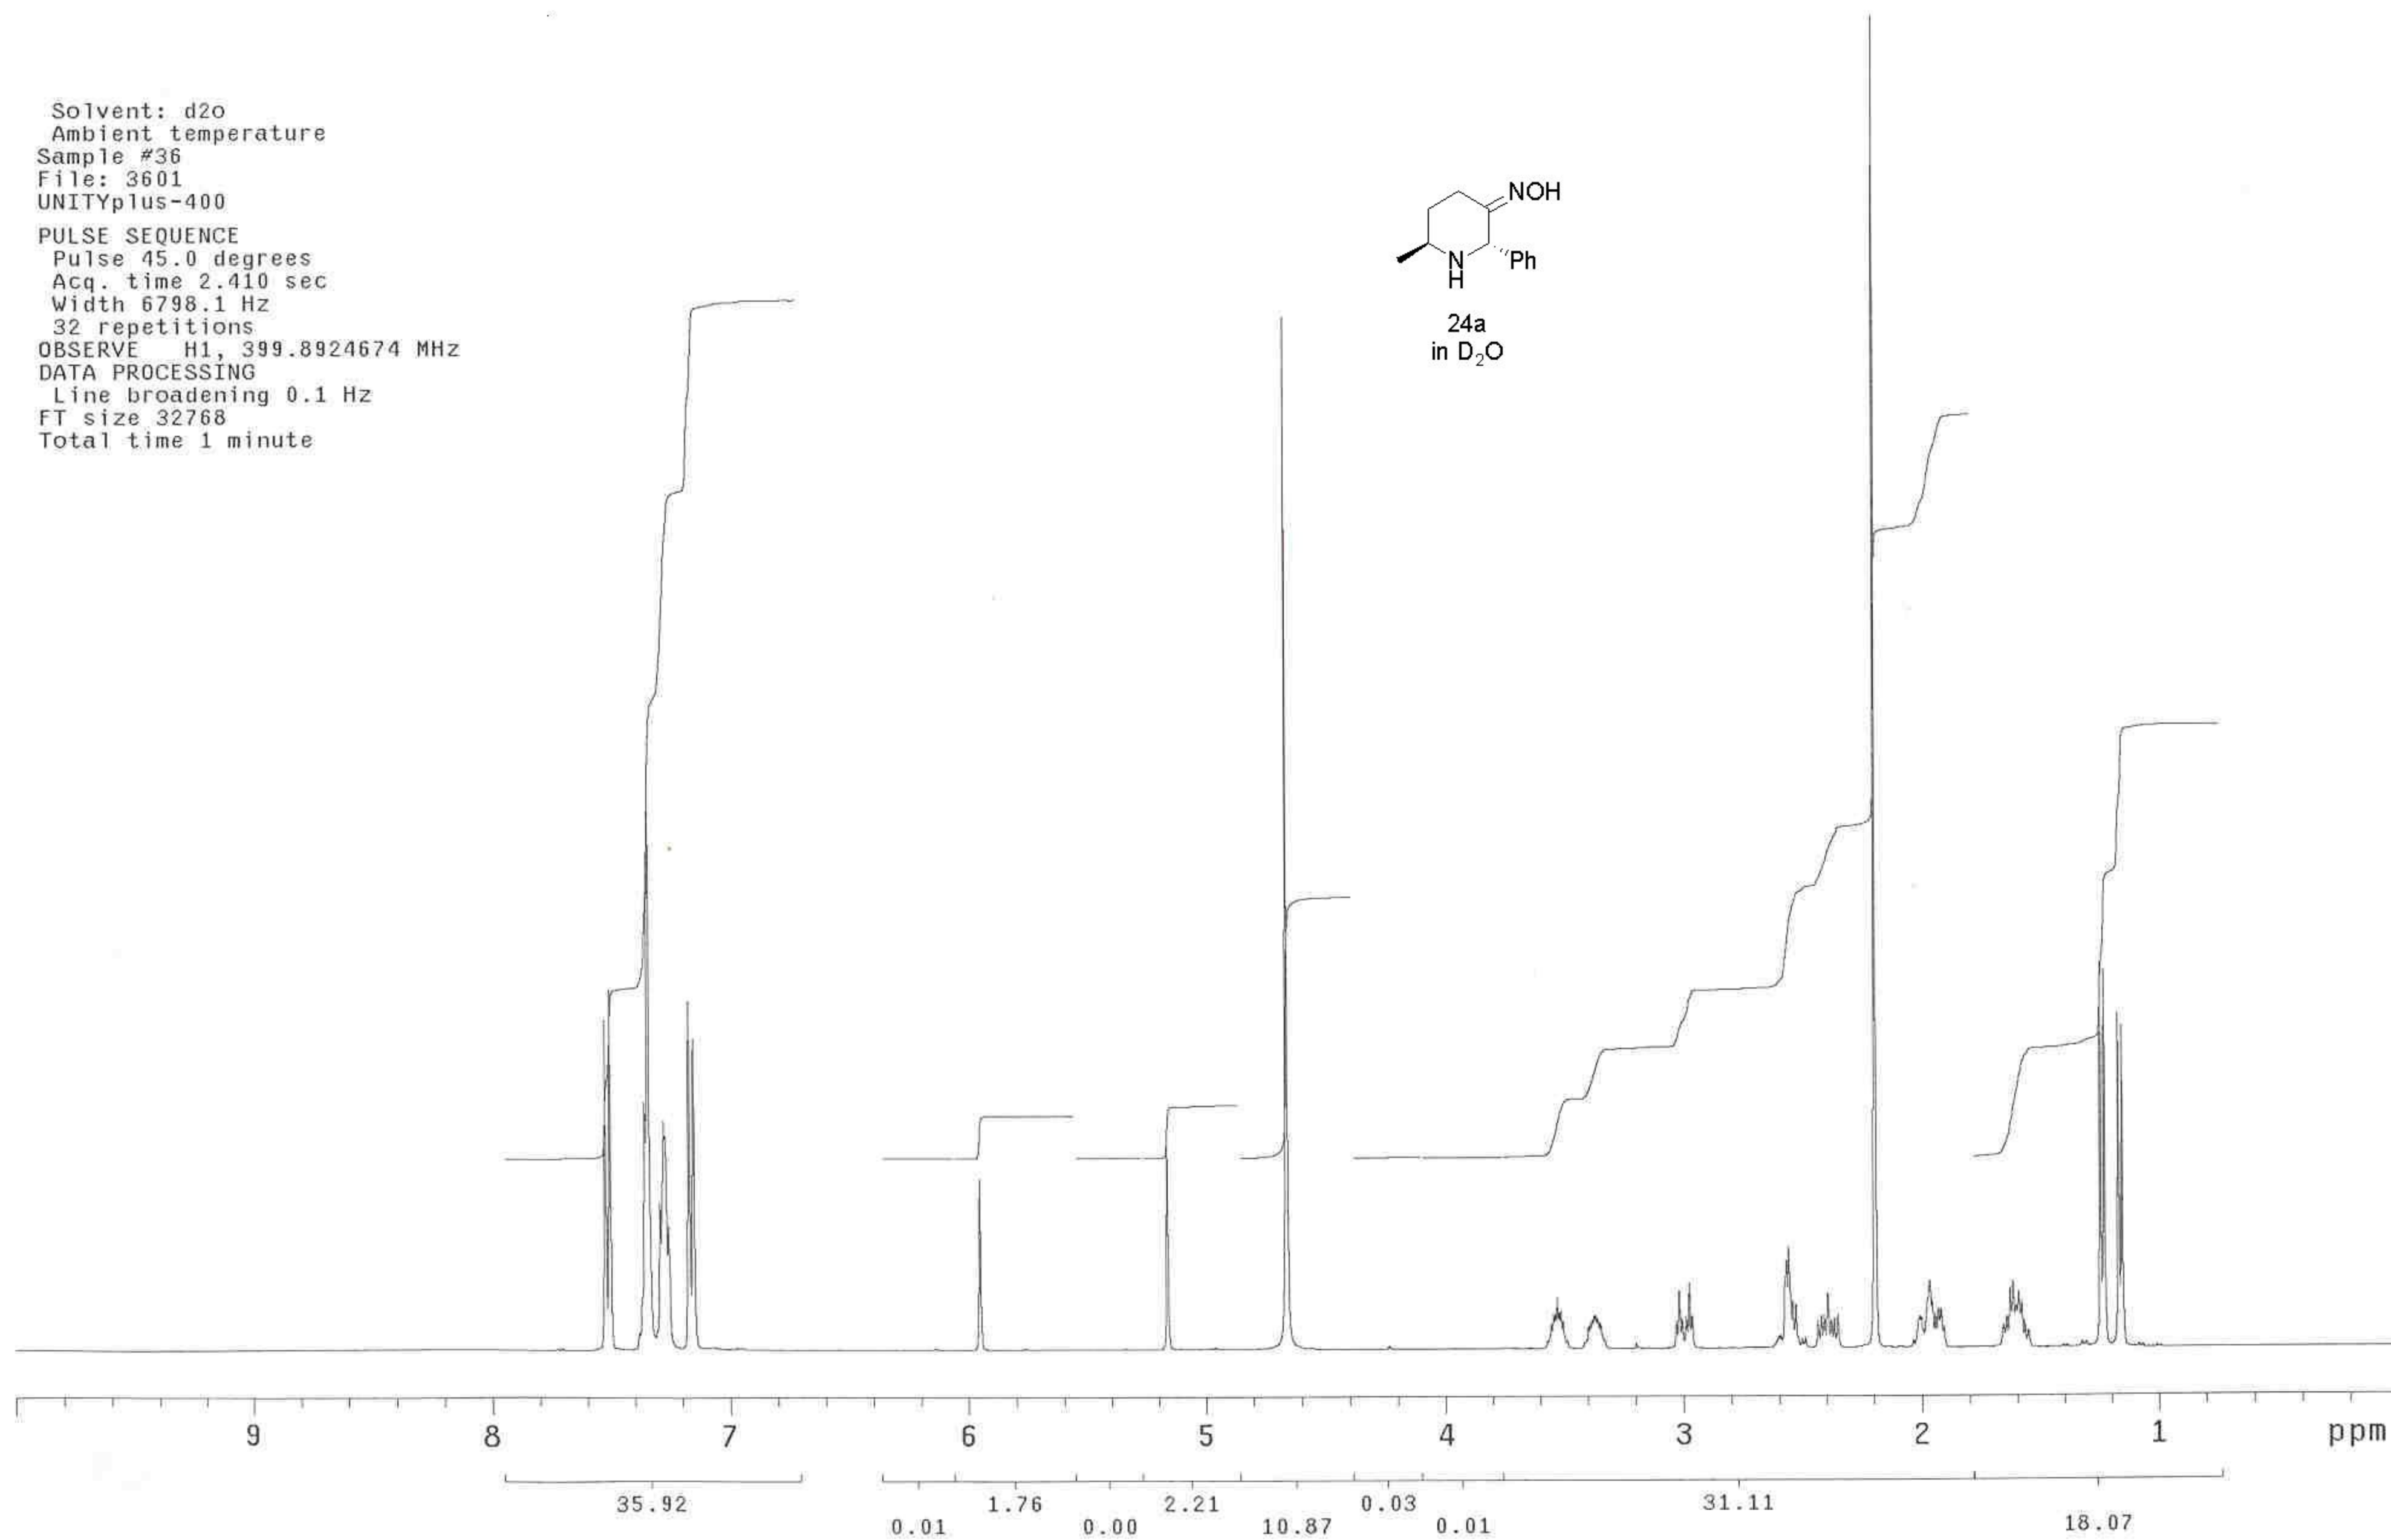

Solvent: cdc13  
 Ambient temperature  
 UNITYplus-400  
 PULSE SEQUENCE  
 Pulse 45.0 degrees  
 Acq. time 2.411 sec  
 Width 6795.2 Hz  
 16 repetitions  
 OBSERVE H1, 399.7291450 MHz  
 DATA PROCESSING  
 Line broadening 0.1 Hz  
 FT size 32768  
 Total time 1 minute

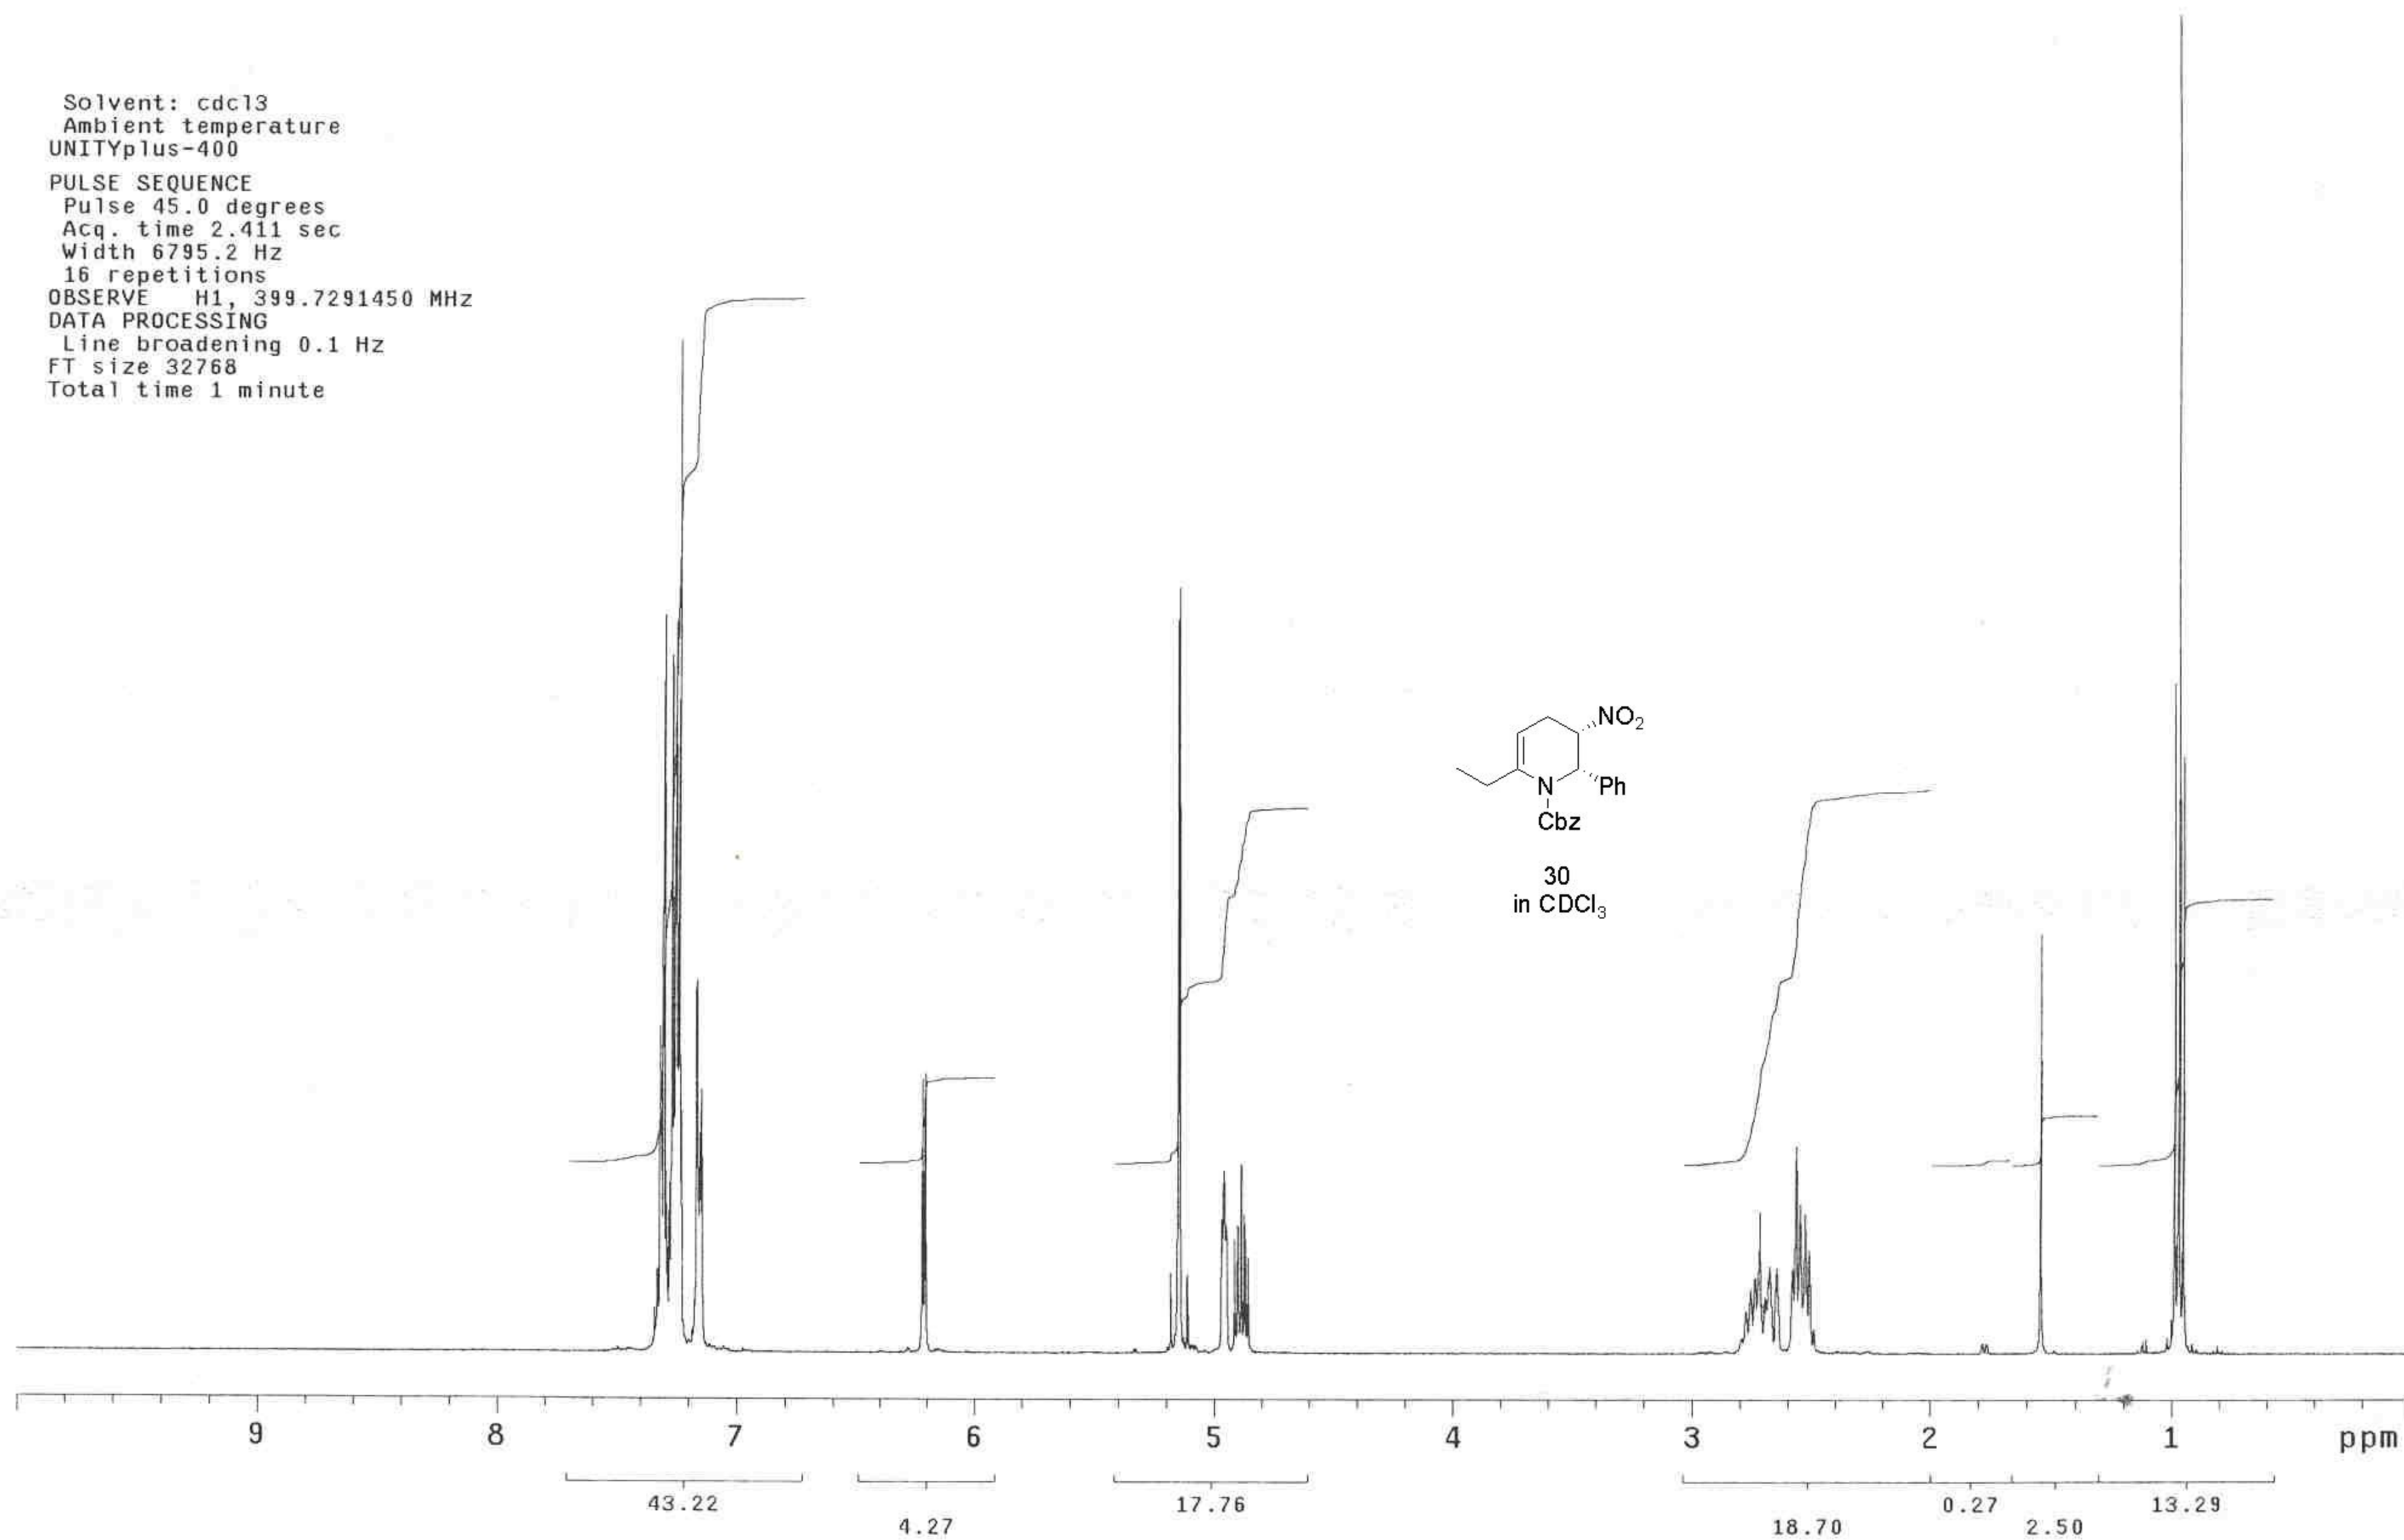



Solvent: cd3od  
Ambient temperature  
UNITYplus-400  
PULSE SEQUENCE  
Pulse 45.0 degrees  
Acq. time 2.411 sec  
Width 6795.2 Hz  
16 repetitions  
OBSERVE H1, 399.7209483 MHz  
DATA PROCESSING  
Line broadening 0.1 Hz  
FT size 32768  
Total time 1 minute

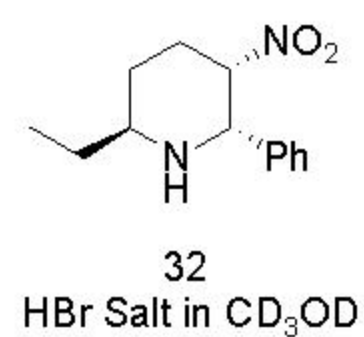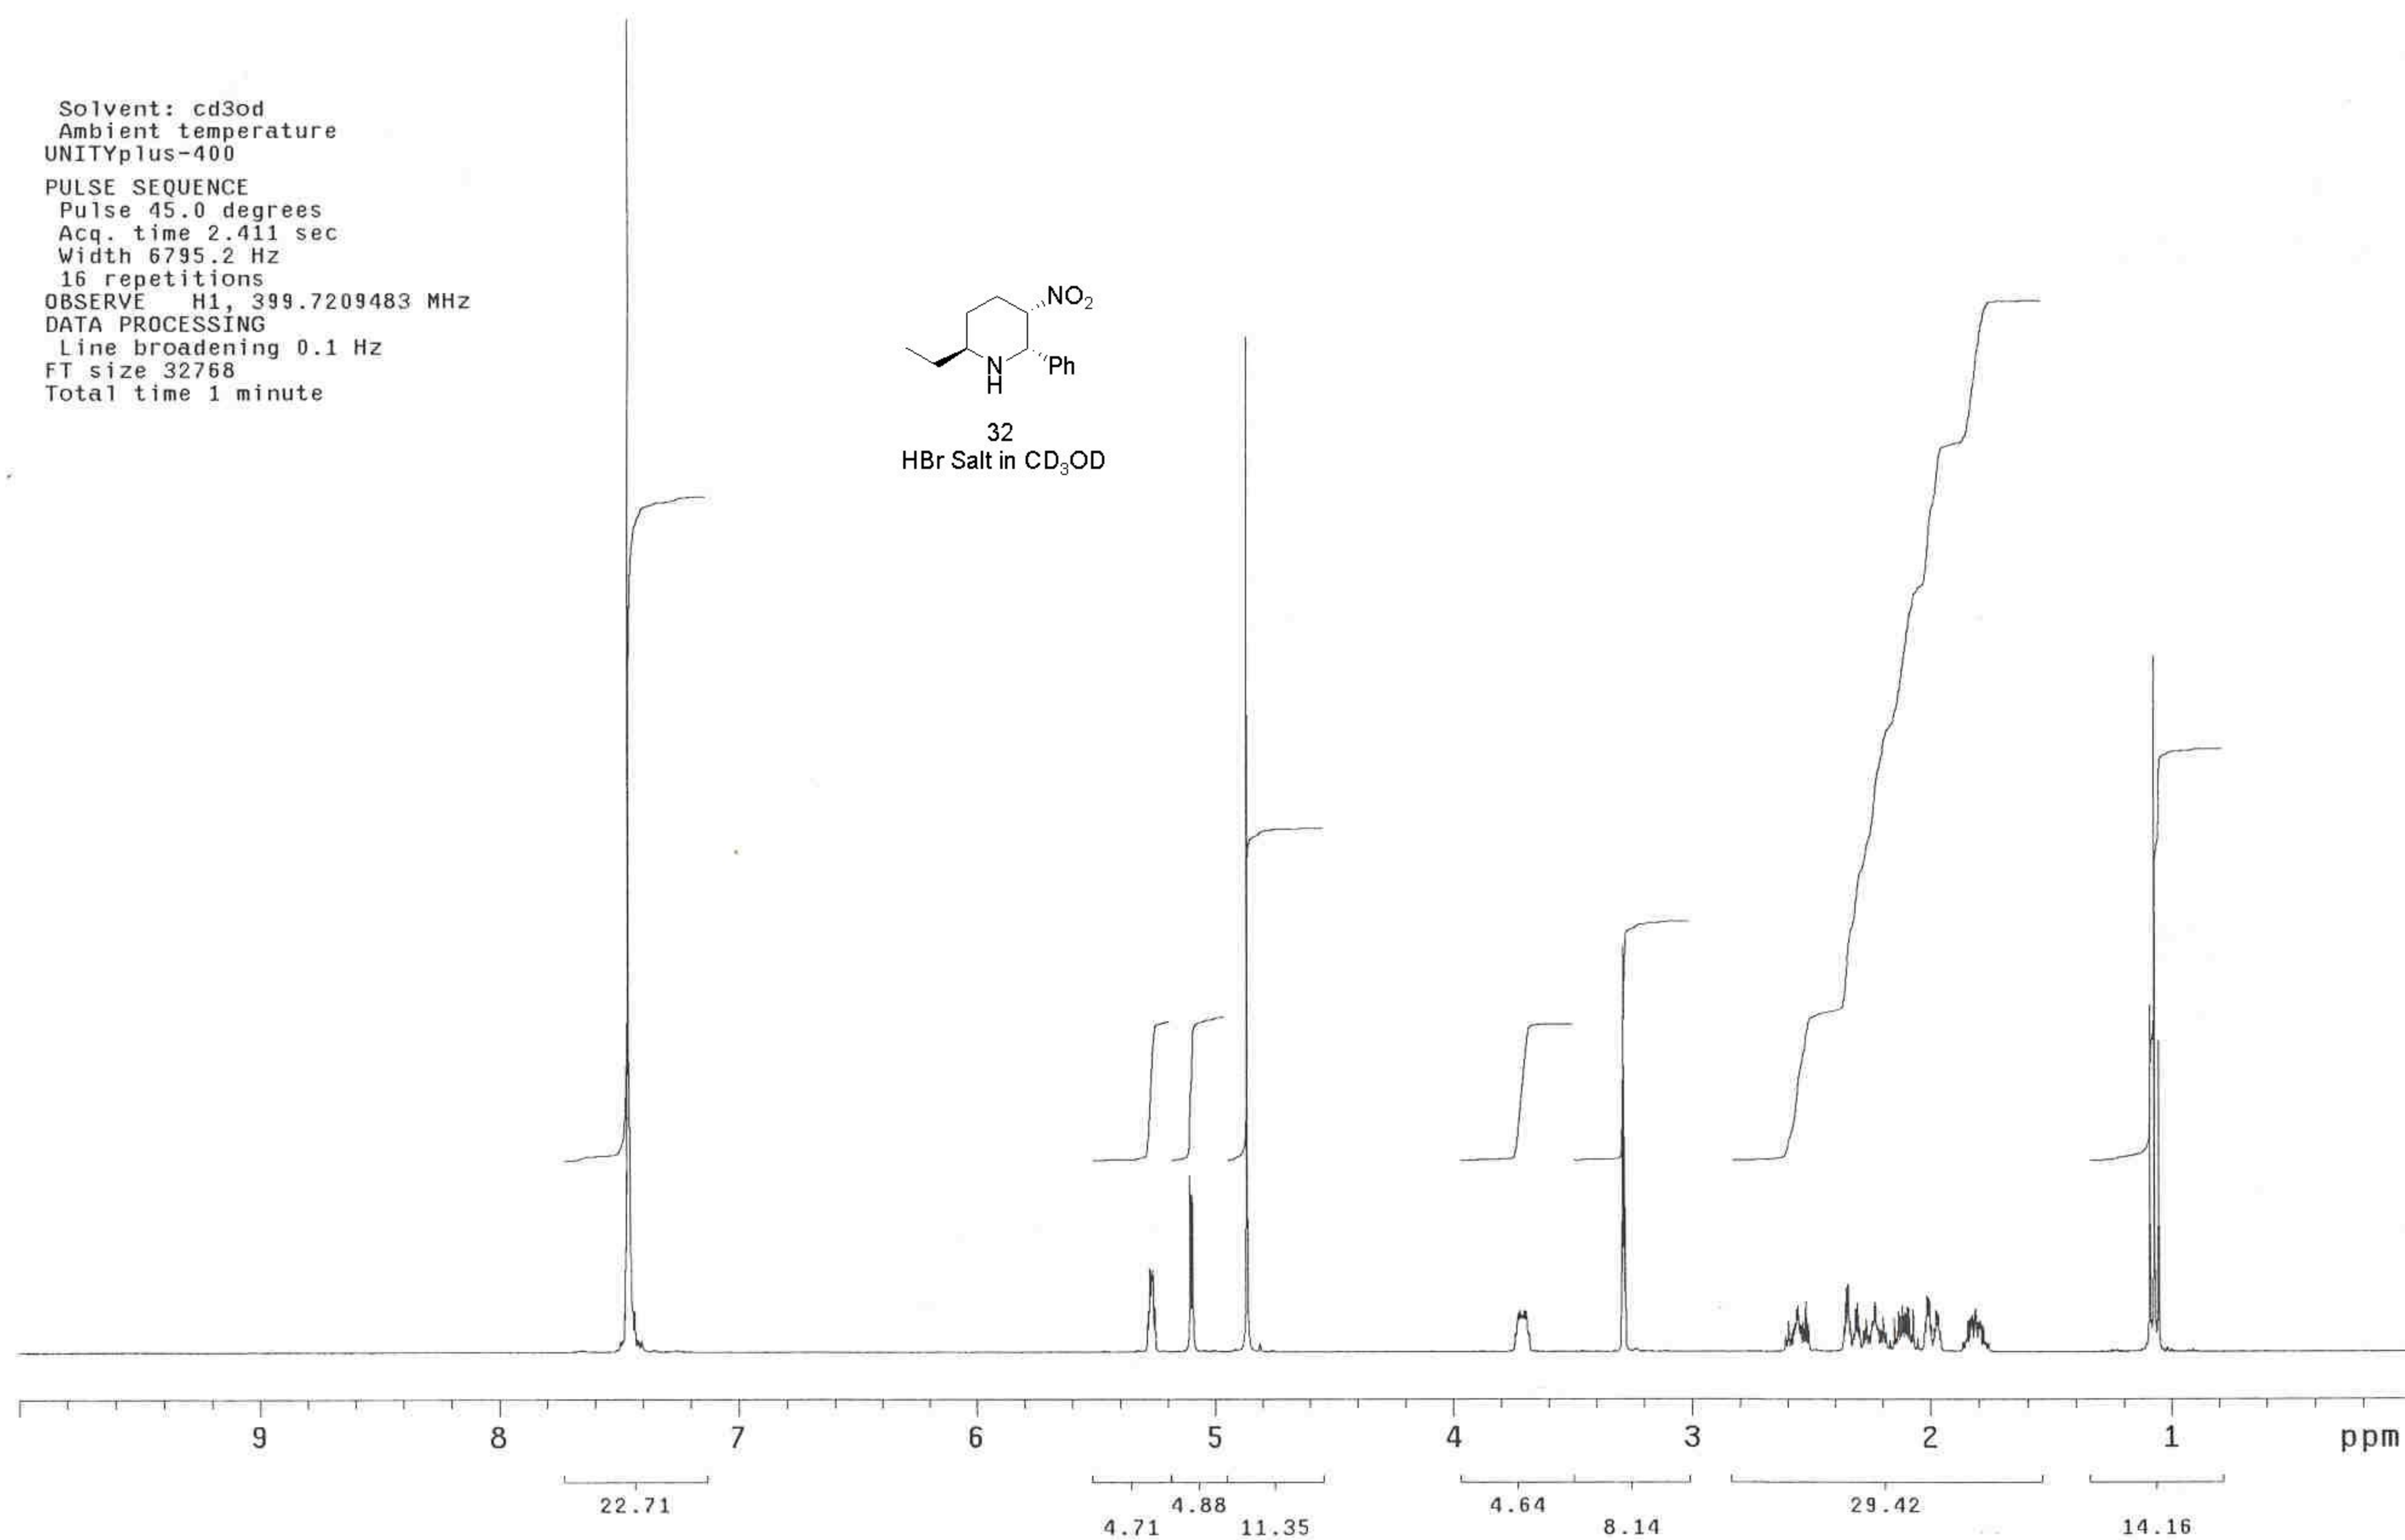

Solvent: cd3od  
Ambient temperature  
UNITYplus-400  
PULSE SEQUENCE  
Pulse 45.0 degrees  
Acq. time 2.411 sec  
Width 6795.2 Hz  
16 repetitions  
OBSERVE H1, 399.7209483 MHz  
DATA PROCESSING  
Line broadening 0.1 Hz  
FT size 32768  
Total time 1 minute

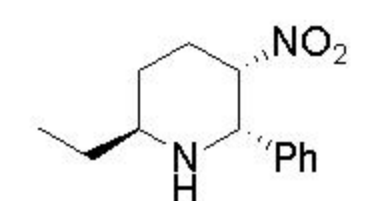

34  
HBr Salt in CD<sub>3</sub>OD

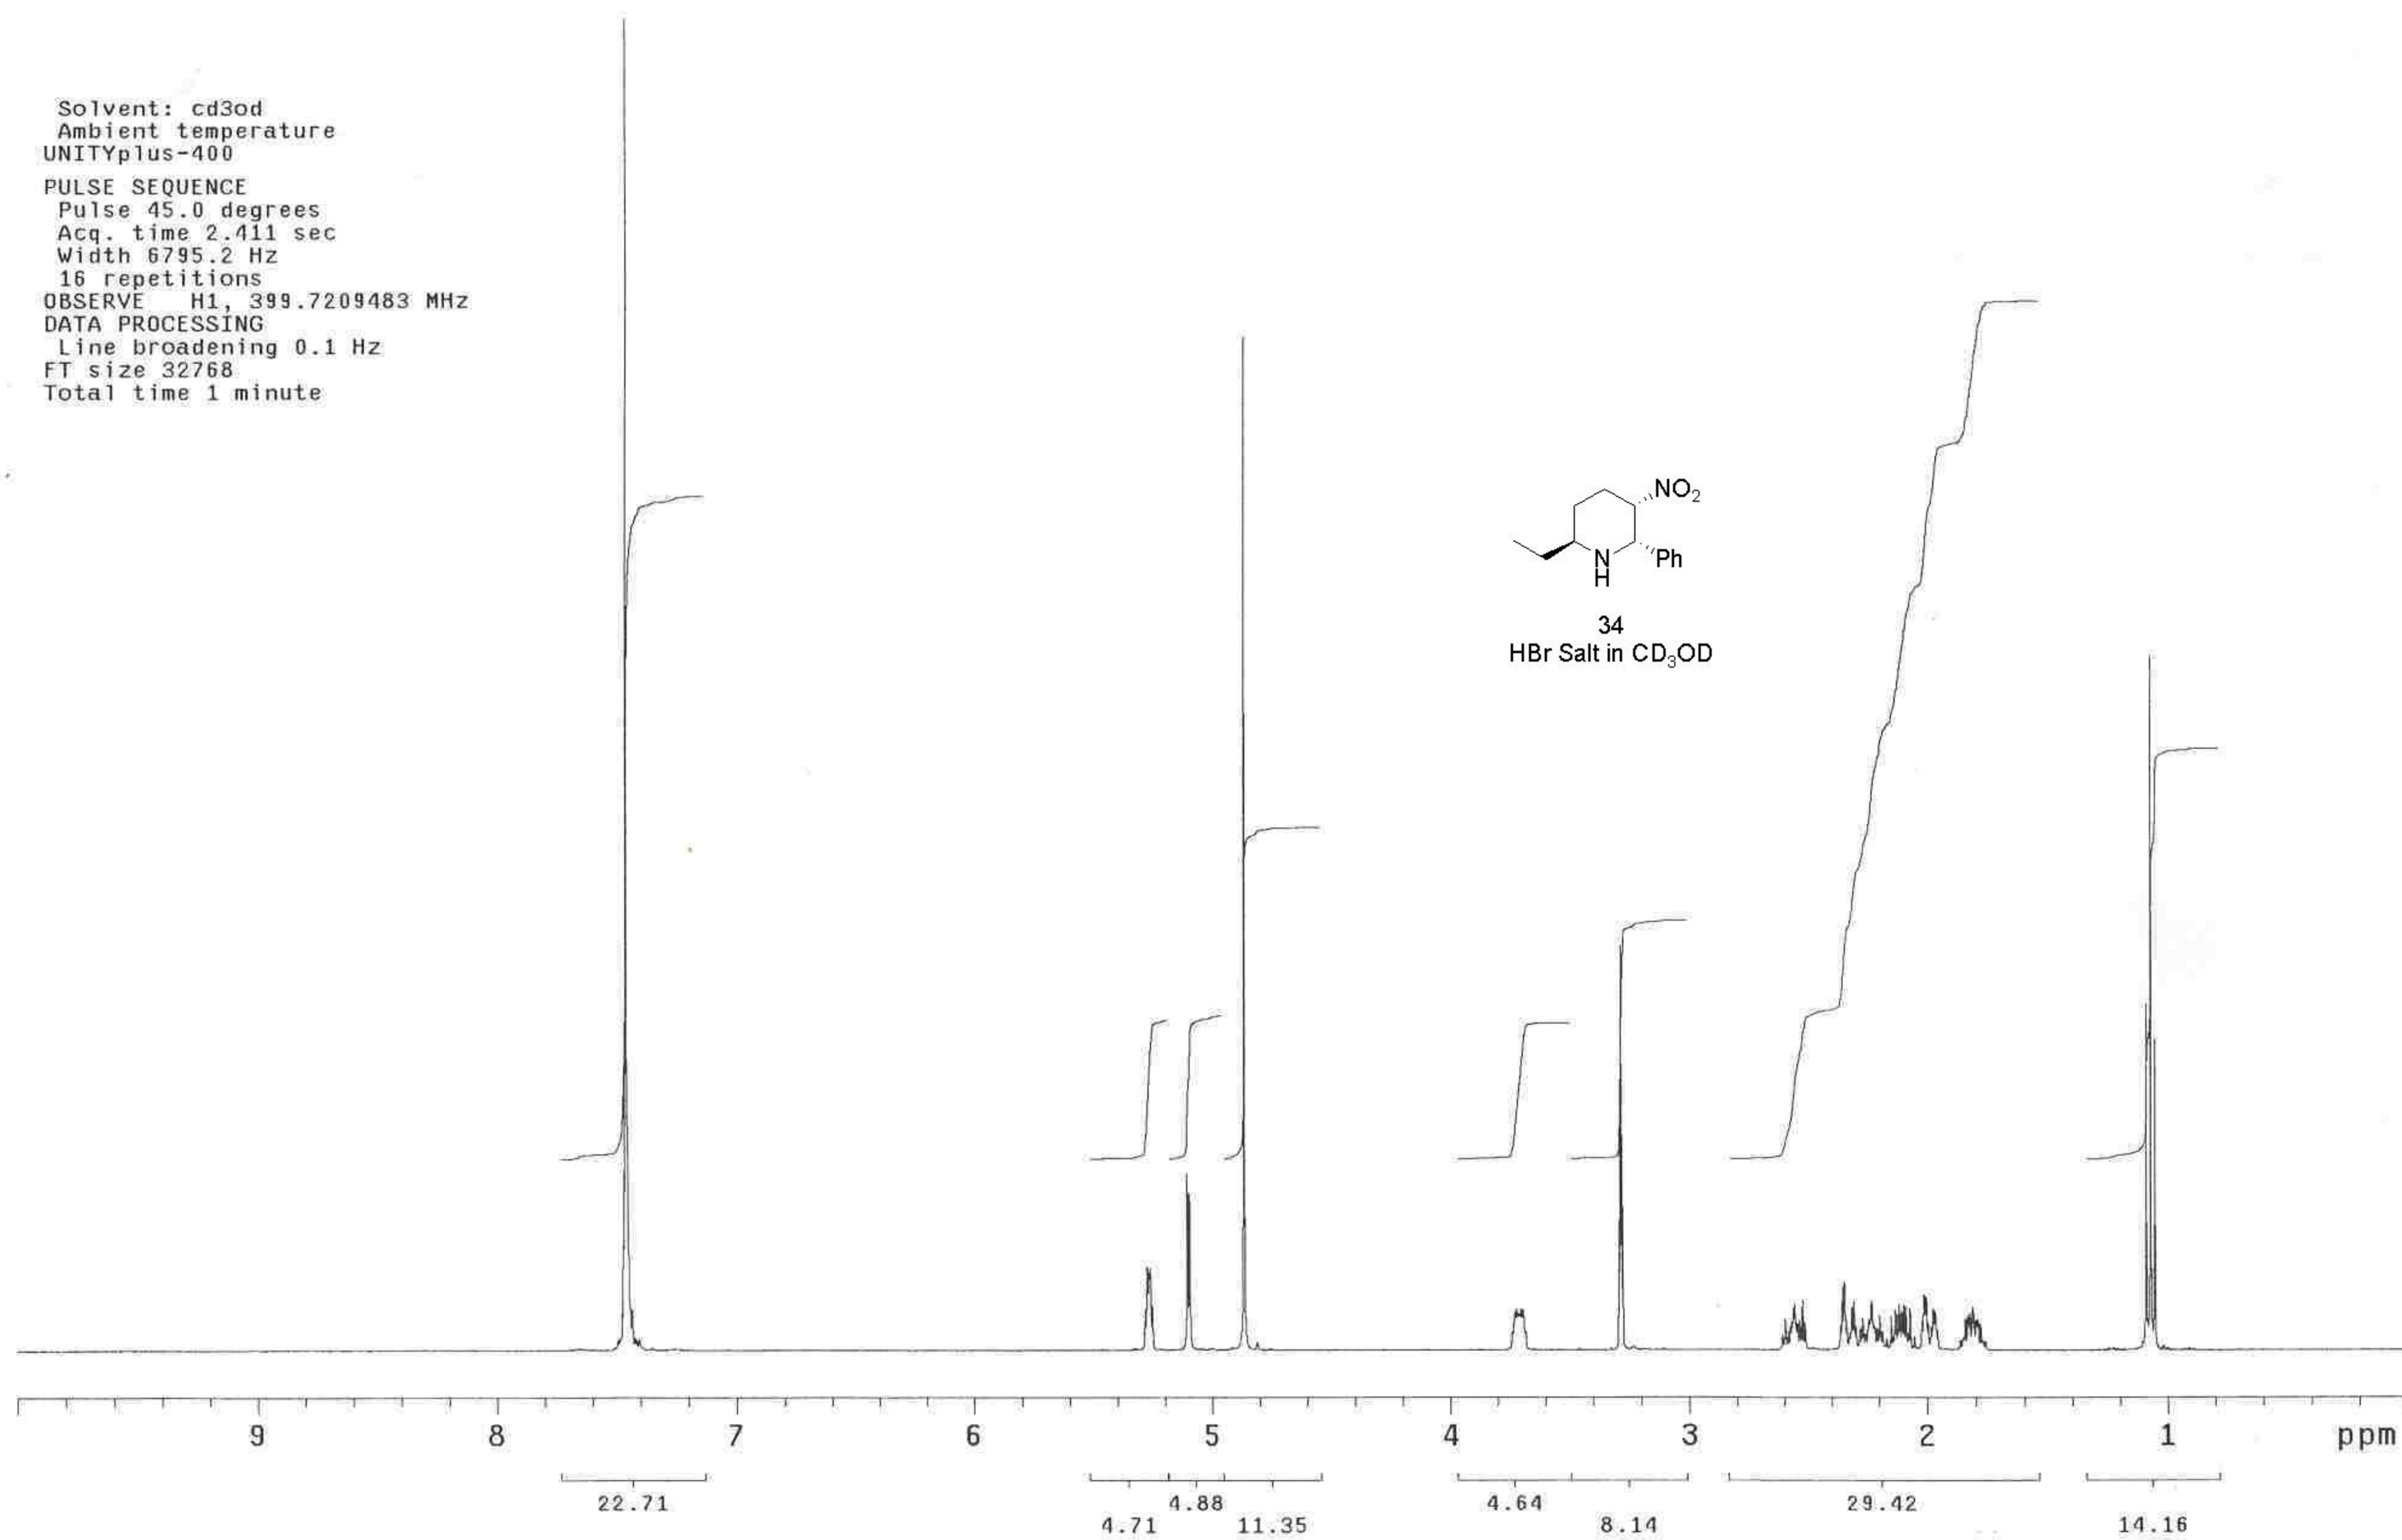

Solvent: d2o  
Ambient temperature  
UNITYplus-400  
PULSE SEQUENCE  
Pulse 45.0 degrees  
Acq. time 2.411 sec  
Width 6795.2 Hz  
16 repetitions  
OBSERVE H1, 399.7301723 MHz  
DATA PROCESSING  
Line broadening 0.1 Hz  
FT size 32768  
Total time 1 minute

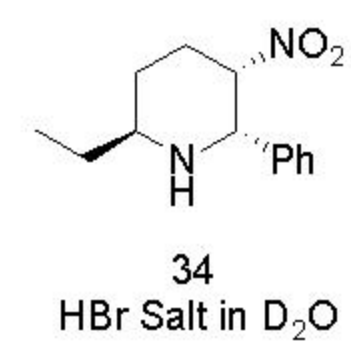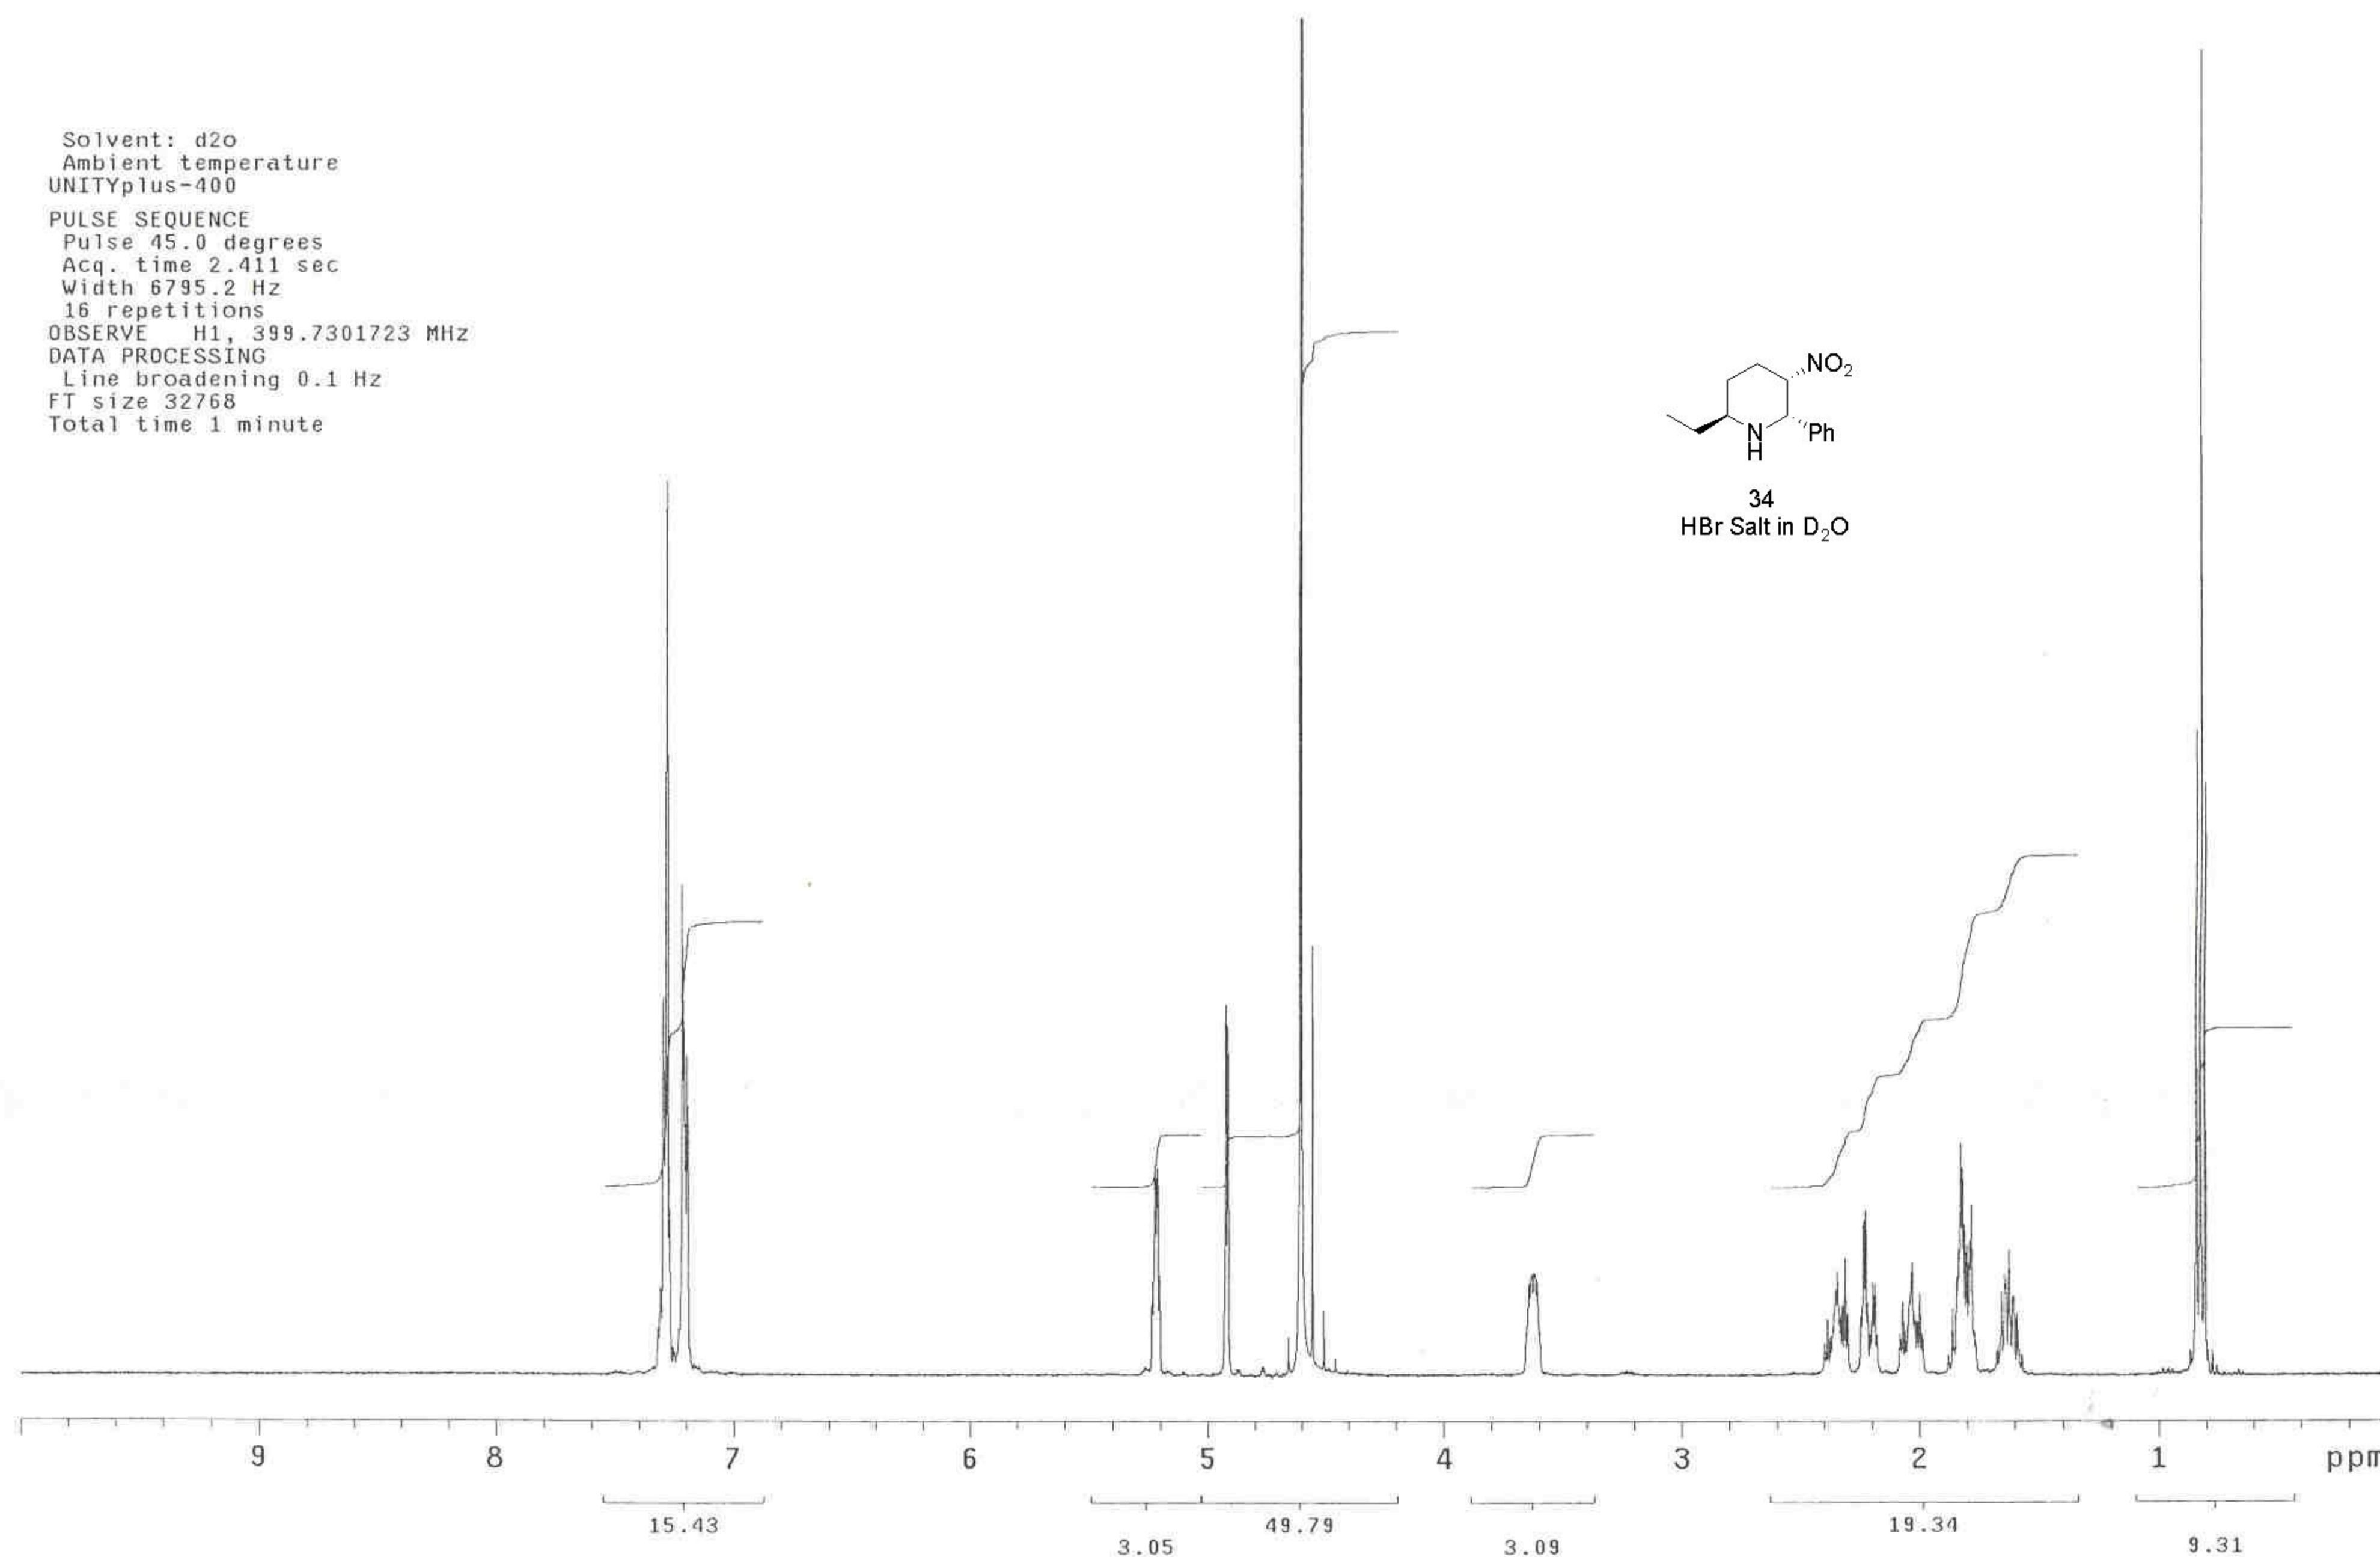

Solvent: d2o  
Ambient temperature  
UNITYplus-400  
PULSE SEQUENCE  
Pulse 45.0 degrees  
Acq. time 2.411 sec  
Width 6795.2 Hz  
16 repetitions  
OBSERVE H1, 399.7204007 MHz  
DATA PROCESSING  
Line broadening 0.1 Hz  
FT size 32768  
Total time 1 minute

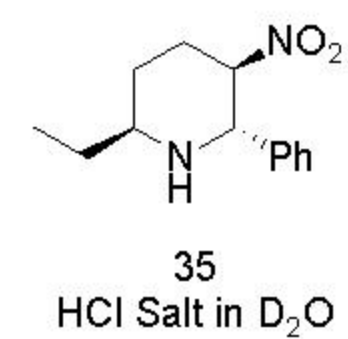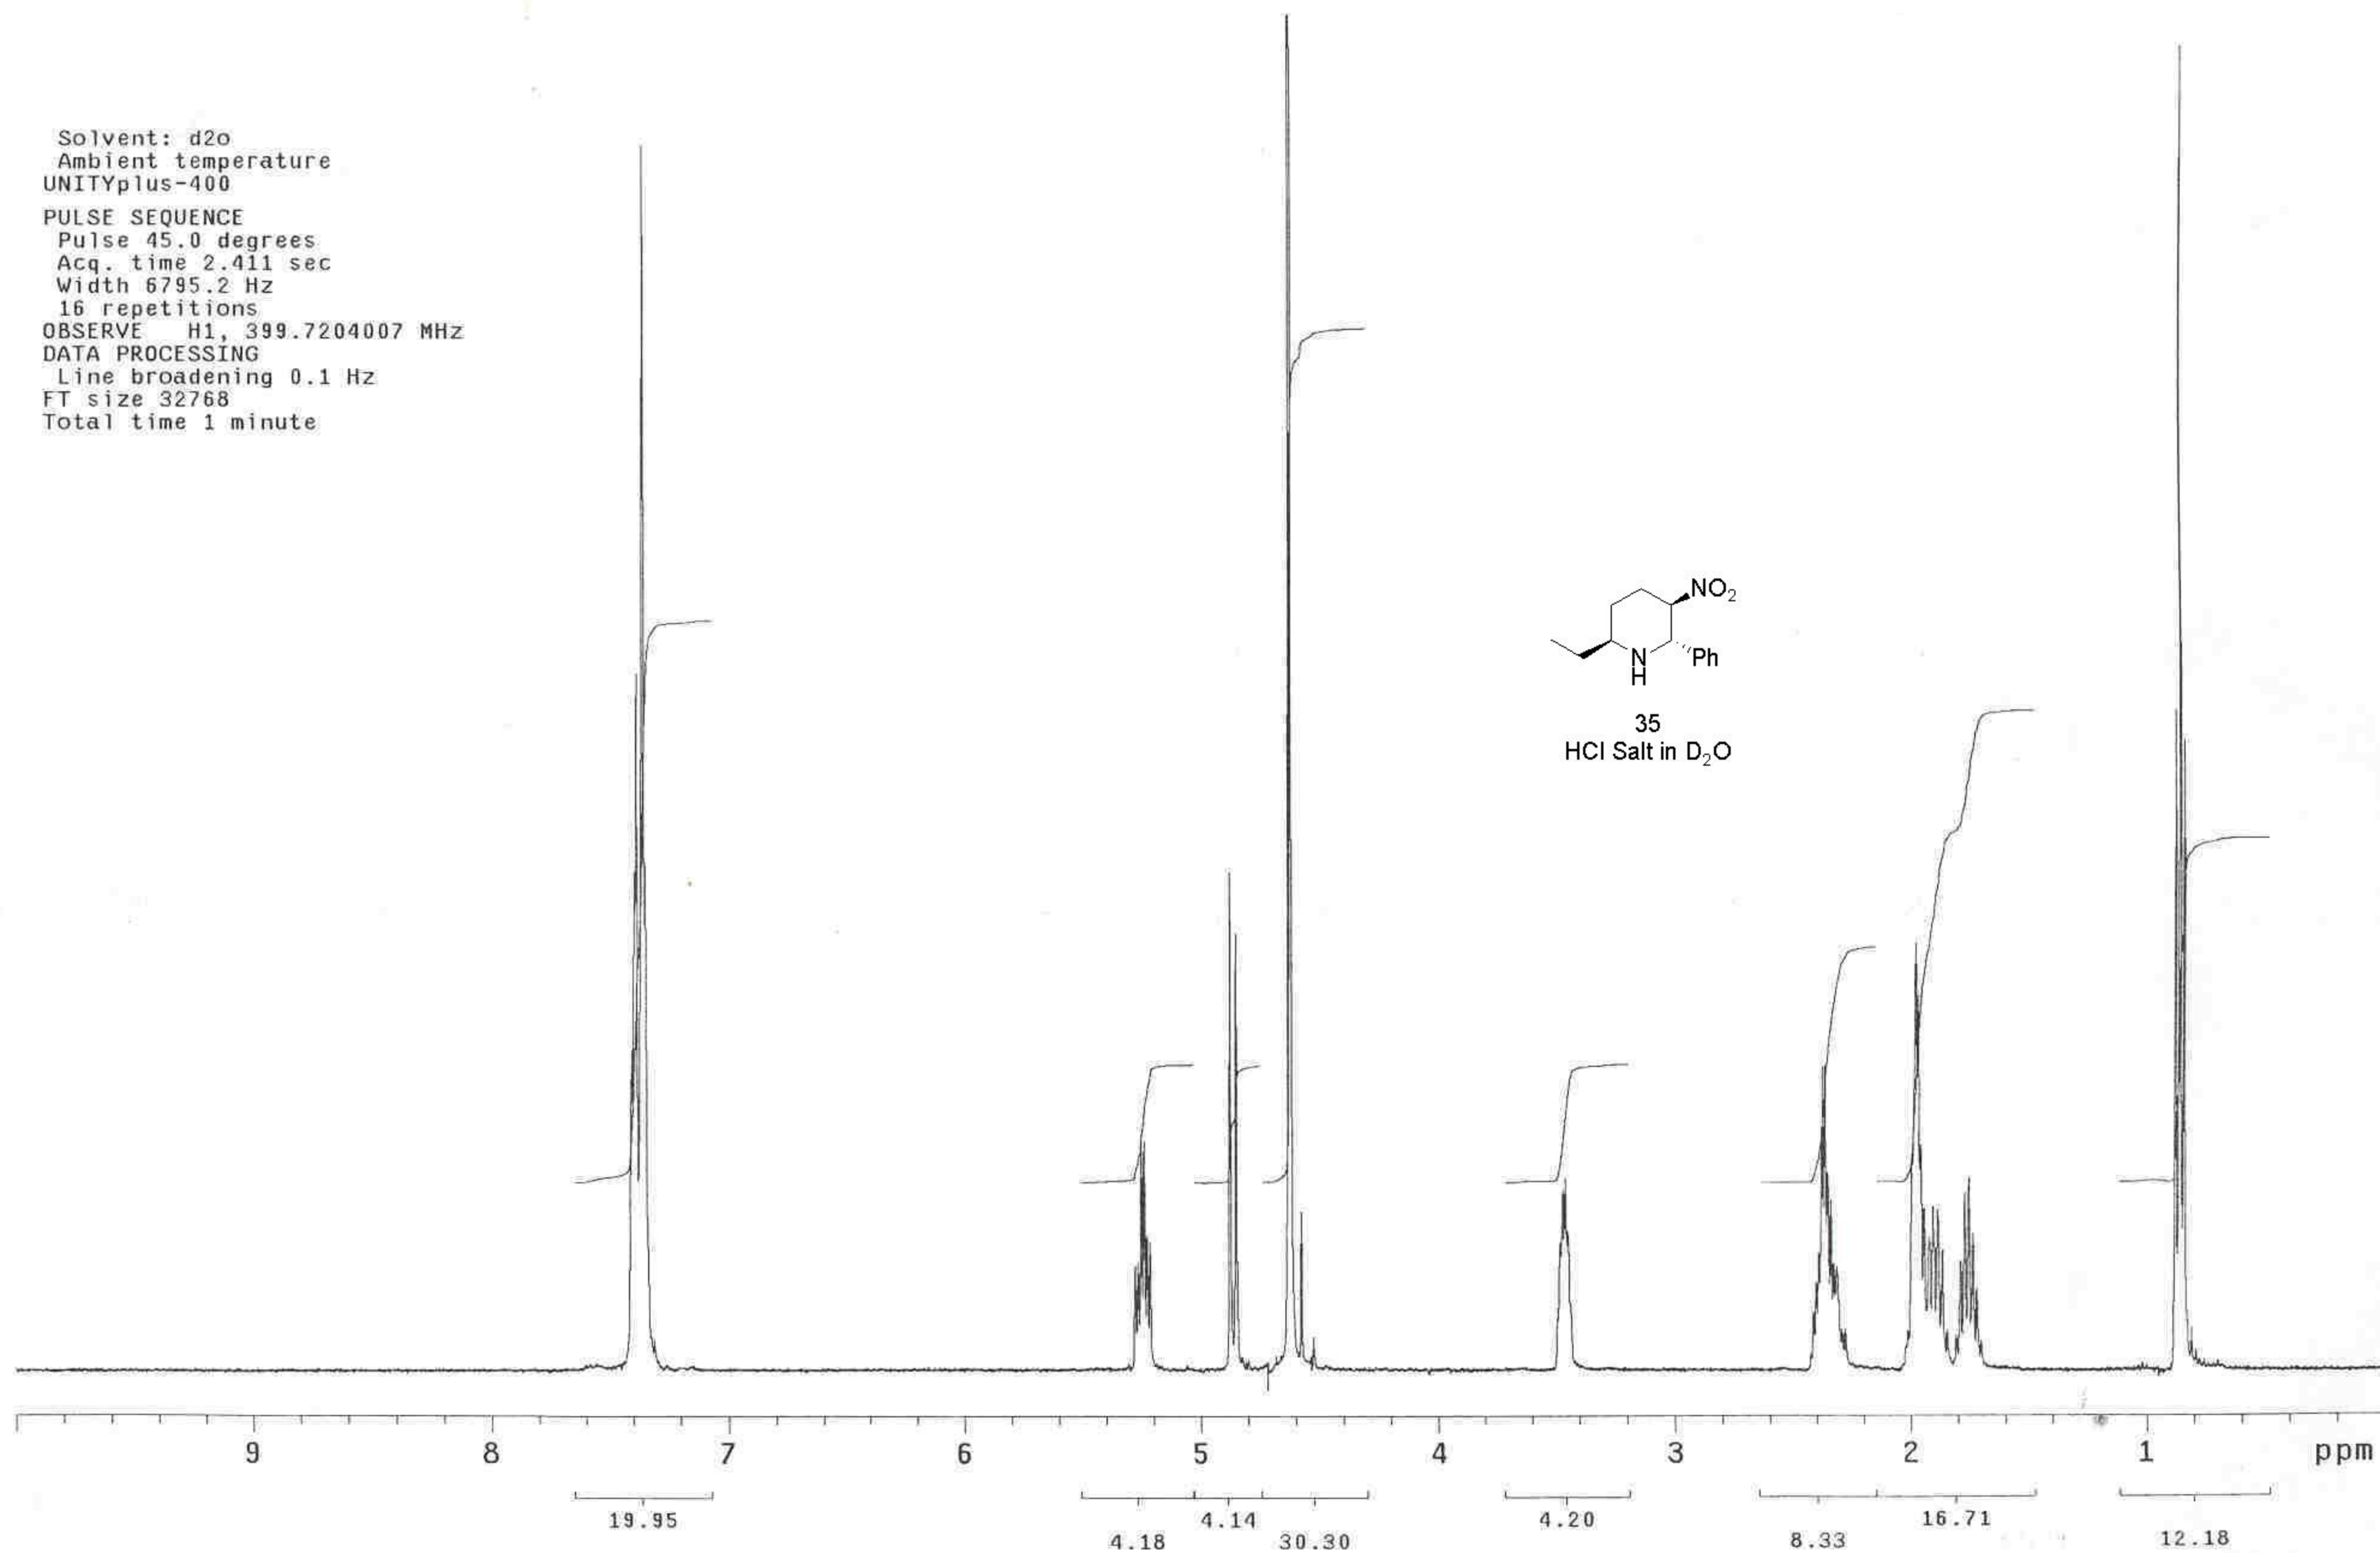



# X-Ray Crystallography ORTEP Diagram for **12-cis**

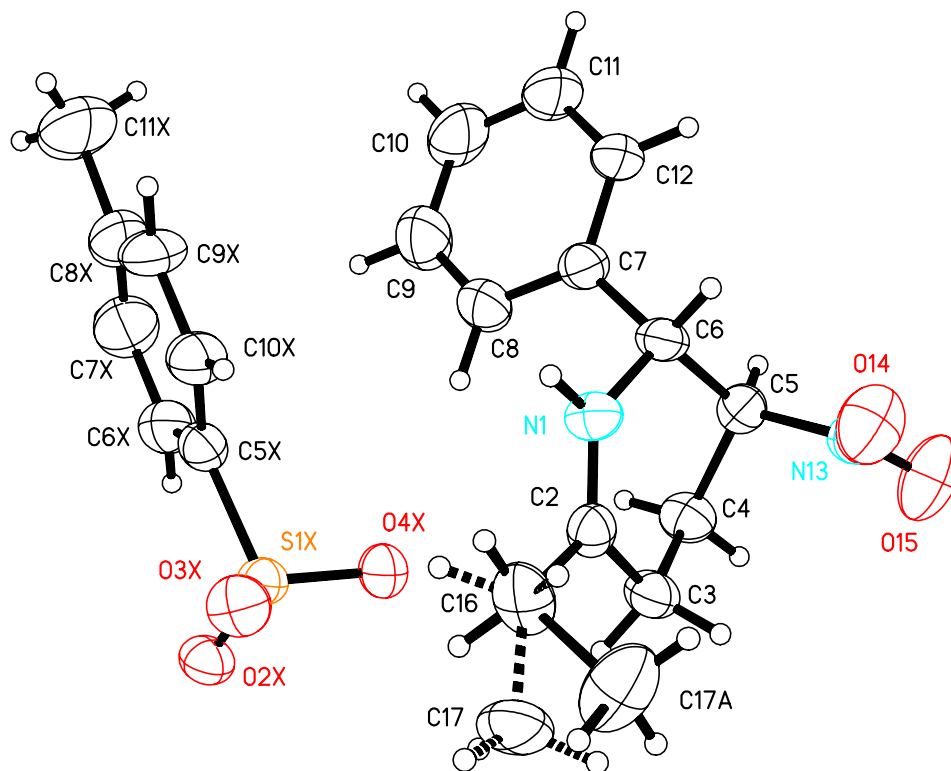

Disorder in ethy residue  
shown with -----

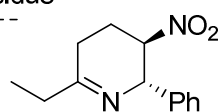

TsOH

**12-trans**

X-Ray Crystallography ORTEP Diagram for **13-syn**

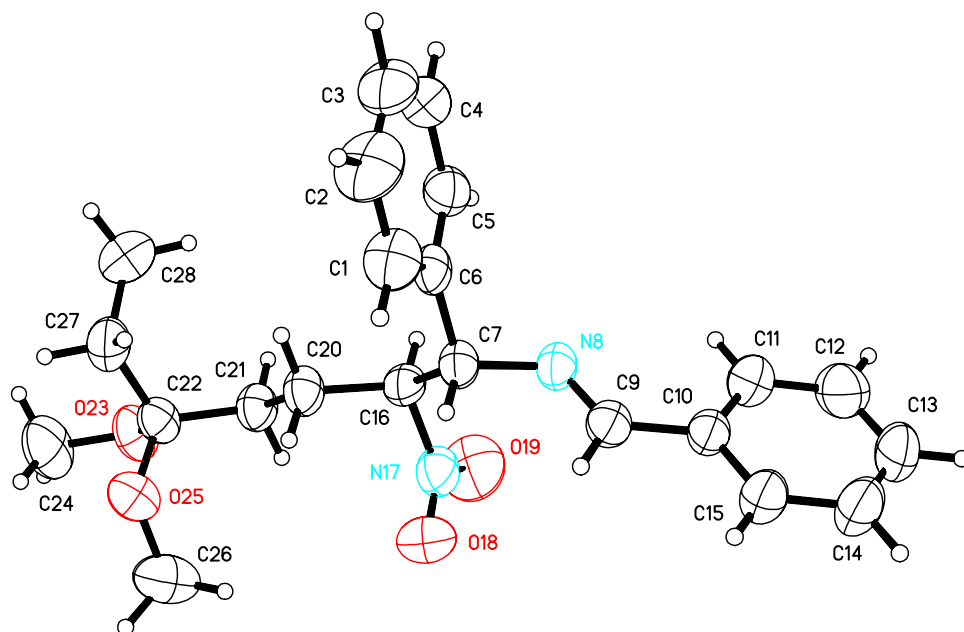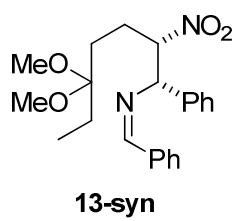

X-Ray Crystallography ORTEP Diagram for **30a**

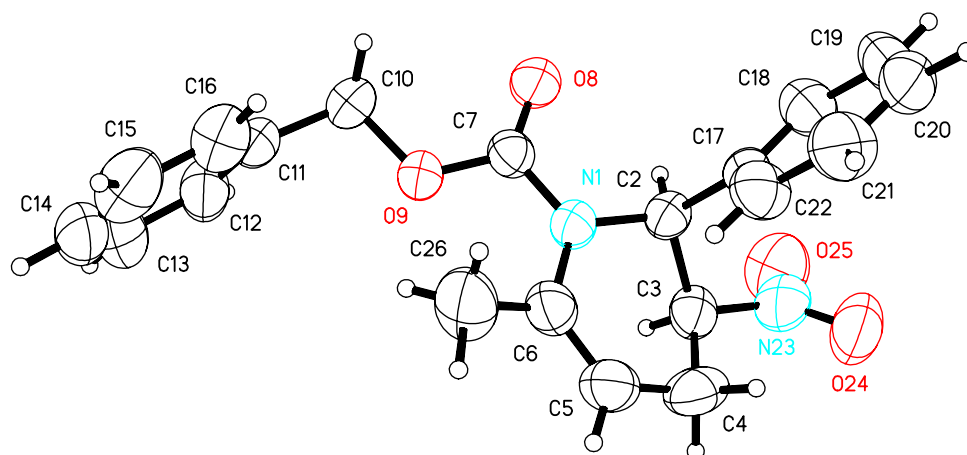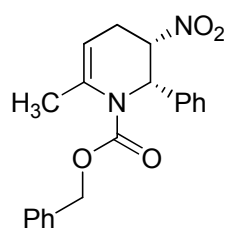

**30a**

X-Ray Crystallography ORTEP Diagram for **34**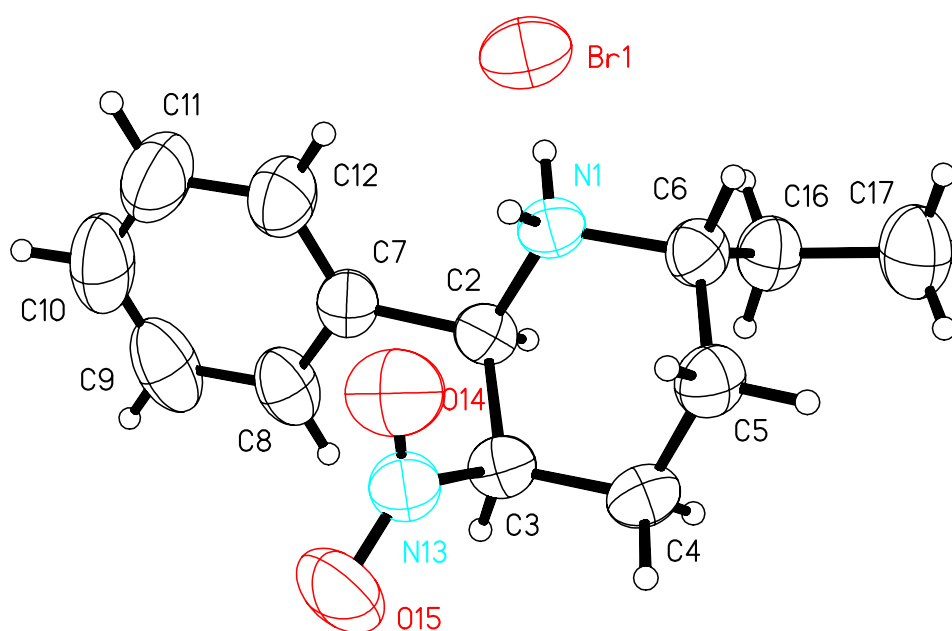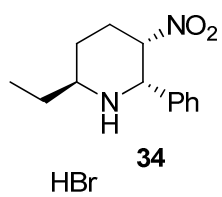

Supplement: Supplementary file 1 [file 4546504]
